# Supplementary material for: CDH13 promoter SNPs with pleiotropic effect on cardiometabolic parameters represent methylation QTLs
Source: PubMed Central journal article supplement (PMC4318987; doi:10.1007/s00439-014-1521-6), 2014-12-28
Supplement: 439_2014_1521_MOESM1_ESM.pdf [file 439_2014_1521_MOESM1_ESM.pdf]

## **SUPPLEMENTAL MATERIAL**

**Title:** *CDH13 promoter SNPs with pleiotropic effect on cardio-metabolic parameters represent methylation-QTLs*

**Authors:** Margus Putku<sup>1</sup>, Mart Kals<sup>2,3</sup>, Rain Inno<sup>1</sup>, Silva Kasela<sup>2,4</sup>, Elin Org<sup>1,5</sup>, Viktor Kožich<sup>6</sup>, Lili Milani<sup>2</sup>, Maris Laan<sup>1</sup>

### **Affiliations:**

<sup>1</sup>Human Molecular Genetics Group, Institute of Molecular and Cell Biology, University of Tartu, Tartu, Estonia; <sup>2</sup>Estonian Genome Center, University of Tartu, Tartu, Estonia; <sup>3</sup>Institute of Mathematical Statistics, University of Tartu, Tartu, Estonia; <sup>4</sup>Department of Biotechnology, Institute of Molecular and Cell Biology, University of Tartu, Tartu, Estonia; <sup>5</sup>Department of Medicine/Division of Cardiology, David Geffen School of Medicine, UCLA, Los Angeles, USA; <sup>6</sup>Institute of Inherited Metabolic Diseases, Charles University – First Faculty of Medicine, Prague, Czech Republic

### **Correspondence and request for reprints:**

Maris Laan, Institute of Molecular and Cell Biology, University of Tartu, Riia St. 23, Tartu 51010, Estonia; Tel: +372-7375008; Fax: +372-7420286; E-mail: [maris.laan@ut.ee](mailto:maris.laan@ut.ee)

## **List of Supplemental Material:**

### **Supplemental Methods**

Study inclusion criteria, measurement of blood pressure and serum lipids in HYPEST/CADCZ participants

Measurement of serum HMW adiponectin in HYPEST

Data collection, blood pressure and lipid measurements in EGCUT participants

Assessment of suitability of DNA from whole blood for CpG-methylation profiling of *CDH13*

Quality control of CpG methylation measurements in HYPEST/ CADCZ

Long-range PCR for *CDH13* promoted region amplification

Data pre-processing and QC of genome-wide DNA methylation array dataset of EGCUT samples

Assessment of age as a confounder of DNA methylation level in *CDH13* promoter region

Genotyping and association testing of the GT-microsatellite located within the *CDH13* promoter CpG island

**Supplemental Table S1** Sequences of oligonucleotide primers

**Supplemental Table S2** CpG-sites targeted for methylation measurement with Sequenom MassARRAY EpiTYPER™ application

**Supplemental Table S3** CpG sites overlapping in HYPEST, CADCZ and EGCUT datasets

**Supplemental Table S4** LD ( $r^2$ ) between common SNPs identified by resequencing in HYPEST and CADCZ and previously known SNPs associated with cardio-metabolic traits using EGCUT genotype data

**Supplemental Table S5** Assessment of age as a potential covariate affecting DNA methylation level - association testing between *CDH13* DNA methylation at 46 CpG sites/units with age among HYPEST and CADCZ study subjects

**Supplemental Table S6** SNP-s identified by promoter region resequencing

**Supplemental Table S7** Genetic association between four overlapping common SNPs identified in HYPEST -CAD CZ study groups and DNA methylation in the ECGUT sample-set

**Supplemental Table S8** Results of HYPEST-CADCZ meta-analysis for association tests between the DNA methylation level at targeted *CDH13* promoter CpG sites/units and cardio-metabolic traits

**Supplemental Figures and legends**

**Supplemental Figure S1** Overview of the study data and analysis

**Supplemental Figure S2** *CDH13* DNA methylation in different blood cell types

**Supplemental Figure S3** *CDH13* promoter region targeted to DNA methylation analysis

**Supplemental Figure S4** Distribution of microsatellite length variants in HYPEST and CAD CZ

**References to Supplemental Methods**

## **SUPPLEMENTAL METHODS**

### **Study inclusion criteria, measurement of blood pressure and serum lipids in HYPEST/CADCZ participants**

HYPEST subjects (full sample: n=1,966; aged 18-85 yrs) have been recruited across Estonia during 2004-2007 by North Estonia Medical Center (Cardiology and Blood Centres), and by Tartu University Hospital (Cardiology Clinic, Blood Centre) with the main aim to analyze genetic-epidemiological risk factors for cardiovascular disease (CVD) in Estonian population (Org et al. 2011). The CADCZ subjects (full sample: n=869; 18-67 yrs) have been recruited across Czech Republic during 1998-2000 by the Cardiology Department of the 2<sup>nd</sup> Clinic of Internal Medicine, Faculty Hospital Královské Vinohrady in Prague with the main aim to study genetic factors relating to homocysteine metabolism in coronary artery disease (CAD) (Janosíková et al. 2003). For the current study, the HYPEST and CADCZ patients were selected based on the following criteria: (i) clinically diagnosed CVD (MI, CAD, hypertension) or (ii) determined metabolic risk-factors CVD (serum LDL >3 mmol/L, total cholesterol >5 mmol/L; blood pressure >140/90 mmHg).

For all HYPEST and CADCZ subjects resting blood pressure (BP) had been measured by trained clinicians during recruitment. In both studies three BP measurements per subject were obtained after a rest in a sitting position using a standard mercury column sphygmomanometer and size-adjusted cuffs and the median value was recorded. Although longitudinal clinical data for past BP measurements is available for HYPEST subjects (Org et al. 2011), the current study used BP values documented at the recruitment prior the blood draw for DNA extractions. This allowed correct incorporation of subject's age as a potential confounder for methylation level of some CpG sites (Bell et al. 2012; Gomes et al. 2012).

Biochemical parameters (total cholesterol, LDL, HDL and triglycerides) from fasting serum of each participant were measured at the recruitment. Clinical chemistry assays for HYPEST samples were performed using standardized assays (Cobas Integra 800® analytical platform, Roche Diagnostics, Inc. USA) applied at the accredited hospital laboratories in Tartu (United Laboratories, Tartu University Clinics) and in Tallinn (Diagnostic Division Laboratory, North Estonia Medical Center). For CAD CZ, serum lipids were measured by routine diagnostics assays at Faculty Hospital Královské Vinohrady, Institute of Clinical Chemistry.

Among 192 HYPEST and 166 CAD CZ subjects 15.6% and 32.5% received lipid-lowering medications, and 86.4% and 25.5% antihypertensive treatment, respectively. For the subjects under treatment, corrected values for blood lipids and for BP were used in subsequent genetic data analysis. Serum lipid levels were corrected according to Wu et al. (2007) (total cholesterol +1.31 mmol/L; HDL -0.059 mmol/L; LDL +1.243 mmol/L; triglycerides +0.222 mmol/L) and BP values according to Tobin et al. (2005) (SBP +15 mmHg; DBP +10 mmHg).

### **Measurement of serum HMW adiponectin in HYPEST**

Serum samples of HYPEST subjects were stored at -86 °C immediately after blood draw. The concentration of high molecular weight (HMW) adiponectin in serum was measured for the study subjects with available stored serum samples (n=184) using Human HMW Adiponectin/Acrp30 ELISA assay (R&D Systems) protocol as recommended by the manufacturer. HMW Adiponectin concentration in serum samples was measured in duplicate on one ELISA reaction plate and the average of two measurements was calculated and used in the following association analysis. Intra- and interassay coefficients of variation were < 5% and < 15%, respectively.

### **Data collection, blood pressure and lipid measurements in EGCUT participants**

The population-based biobank of the Estonian Genome Center of the University of Tartu (EGCUT, <http://www.geenivaramu.ee/en/>) includes epidemiological-clinical datasets and DNA samples extracted from blood for Estonian adults across all age groups (n=51,515; Leitsalu et al. 2014). Each participant filled out a Computer Assisted Personal interview ([http://www.geenivaramu.ee/sites/default/files/geenivaramu/ksimustiku\\_tutvustus.pdf](http://www.geenivaramu.ee/sites/default/files/geenivaramu/ksimustiku_tutvustus.pdf)) during 1-2 hours at a recruitment office, including personal data, genealogical data, lifestyle data and medical history (diseases recorded in ICD-10 systems and the use of medicaments). Height, weight and BP phenotypes (SBP and DBP) were measured at the recruitment office according to standard medical procedures. BP was measured three times per subject after a rest in a sitting position and the median values were used in the analysis. Serum lipid parameters (total cholesterol, LDL, HDL and triglycerides) were assessed from fresh blood at the United Laboratories, Tartu University Clinics using identical assays and platforms as for the HYPEST samples. The whole project is conducted according to the Estonian Genes Research Act (<http://www.geenivaramu.ee/for-scientists/human-genes-research-act.html>; Dec 13<sup>th</sup>, 2000) and all participants have signed the informed consent.

In the current study, *in silico* data for the *CDH13* region was extracted and analyzed for the EGCUT samples (n=165; aged 18-84; 41.6±22.7 years) with available datasets for both, genome-wide DNA methylation (Infinium HumanMethylation450 BeadChip, Illumina) and genome-wide imputed genotypes (HumanOmniExpress BeadChips, Illumina). Among the included 165 EGCUT subjects 5.5% received lipid-lowering and 24.2% antihypertensive treatment. In the statistical analyses, serum lipid and BP values of these individuals were corrected using the identical approach as described for the HYPEST and CAD CZ subjects.

## **Assessment of suitability of DNA from whole blood for CpG-methylation profiling of *CDH13***

Whole blood consists of many different cell types, which may be characterized by differential CpG-methylation at several loci (Adalsteinsson et al. 2012). In order to assess the suitability of DNA extracted from whole blood for the reliable CpG methylation profiling at the *CDH13* locus, a publicly available genome-wide DNA methylation dataset for purified human blood cells was used (Reinius et al. 2012; [http://publications.scilifelab.se/kere\\_j/methylation](http://publications.scilifelab.se/kere_j/methylation)). This dataset comprises of DNA methylation profiles of six healthy male subjects determined for whole blood, mononuclear cells, granulocytes, and cells from seven selected purified lineages. DNA methylation analysis was performed with the Infinium Human Methylation 450K bead chip technology (Illumina, USA). For the current study DNA methylation values for 69 CpG sites present at the 450K chip for the *CDH13* genic region (GRCh37/hg19, Chr16:82,638,798 – 83,838,786) were comparatively assessed in different blood cell types and whole blood (**Figure S2**). All analyzed blood cell types demonstrated similar CpG methylation profile across the entire *CDH13* promoter and genic region, supporting the suitability of using whole blood cells for the inter-individual DNA methylation studies of *CDH13*.

## **Experimental and analytical details, and quality control of CpG methylation measurements in HYPEST/ CAD CZ**

Four EpiTYPER<sup>TM</sup> assays were designed to cover 110 CpG sites (13-40 CpG-sites/assay) within a ~1.5 kb target region (1162 bp; GRCh37/hg19, Chr16: 82,660,652 – 82,661,813; **Figure S3**) using the EpiDesigner software as instructed by the manufacturer. The sequence context (e.g. presence of GT-microsatellite repeats) did not allow the inclusion of six CpG-sites. Genomic DNA (400 ng) extracted from whole blood was bisulfite treated using the EZ-

96 DNA Methylation<sup>TM</sup> kit (Zymo Research). Converted DNA was amplified (length of PCR products 289-470 bp) with primers (**Table S1**) containing T7-promoter tag and treated with shrimp alkaline phosphatase (Sequenom Inc.). Purified products were *in vitro* transcribed and fragmented using T-specific cleavage. Fragments (1-57 bp) were analyzed with MassARRAY Analyzer 4 (Sequenom Inc.), and methylation values were calculated by EpiTYPER Analyzer v.1.0 (Sequenom Inc.). Fragments containing >1 CpG sites were named as CpG-units (60 CpG-sites formed 21 CpG-units with 2-6 CpG sites/unit) and the methylation value for a CpG-unit was calculated as average methylation across the CpG-sites forming a unit. The remaining 50 CpG-sites within the targeted region contained 1 CpG-site per fragment and were assessed individually.

EpiTYPER Analyzer assesses the quality for every measured mass spectrum representing one EpiTYPER<sup>TM</sup> assay, and confidence values (CV; 0 = low and 5 = high confidence, respectively) for the spectrums are calculated. Confidence is calculated by analyzing the recalibration of the spectrum, the number of missing signals, and the number of additional signals. After empirical estimation, only assays with  $CV \geq 3$  (88.4% across all assays and analyzed individuals) were included for subsequent analysis. The challenge of the EpiTYPER<sup>TM</sup> assay method is reliable measurement of CpG-methylation for the genomic regions with a high density of CpG sites, such as *CDH13* promoter CpG-island (**Figure S3**). During Quality Control (QC), EpiTYPER<sup>TM</sup> Analyzer program automatically excluded from methylation calculations the fragments with too low (<1500 Da) or too high (>7000 Da) mass for technically reliable in mass-spectrometry measuring range (20 CpG-sites). Fragments with indistinguishable mass or low CpG-methylation call rate were excluded from statistical tests (24 CpG-sites).



Protocol for DNA methylation detection by the EpiTYPER™ assay is detailed in

<http://bioscience.sequenom.com/sites/bioscience.sequenom.com/files/EpiTYPER%20Application%20Note.pdf>). Its principles are described by Ehrich et al (2005).

### **Long-range PCR for *CDH13* promoted region amplification**

Long-range PCR (2,602 bp) was carried out in a 40 µl reaction mixture containing 0.25 mM of each dNTPs (Solis BioDyne, Estonia), 1X Long PCR buffer, 1.5 mM MgCl<sub>2</sub> and 1.25 units of Long PCR enzyme mix (Thermo Fisher Scientific, Lithuania), 0.125 µM of both primers (forward: 5'-TGGTCCATTGCTCAGTGTCCTGC-3', reverse 5'-TGCACCAGTCTCCCCATCCCA-3'), 2.5% dimethyl sulfoxide and 100 ng of template DNA. The amplification was performed in GeneAmp 2700 (Applied Biosciences, USA) instruments under following conditions: initial denaturation at 95°C for 3 min, followed by 10 'touchdown' cycles of 95°C for 15s, and annealing from 66°C to 57°C for 30s, and 68°C for 2.5 min, then an additional 25 cycles of 95°C for 15s, 56°C for 30s and 68°C for 2.5 min. Starting from the 11th cycle the extension time was prolonged by 1s for each remaining cycle. The reaction was ended by final incubation of 68°C for 10 min.

### **Genome-wide DNA methylation array dataset of EGCUT samples**

For genome-wide DNA methylation profiling of EGCUT samples (n=165), 500 ng of each genomic DNA was bisulfite modified using the EZ DNA Methylation kit (Zymo Research, Cat. # D5004) according to the manufacturer's recommendations for the Illumina Infinium Assay. After purification, 4 µl of each bisulfite-converted DNA sample was used for amplification and hybridization on Infinium HumanMethylation450 BeadChips (Illumina Infinium HD Methylation protocol). The original IDAT files were extracted from the HiScanSQ scanner. Data pre-processing and QC analyses were performed in R using the Bioconductor package *minfi* version 3.0.1 (Aryee et al. 2014;

<http://bioconductor.org/packages/release/bioc/vignettes/minfi/inst/doc/minfi.pdf>). ‘Raw’ pre-processing was used to convert the intensities from the red and the green channels into methylated and unmethylated signals. Beta values were computed using Illumina’s formula [ $\beta = M/(M+U+100)$ ]. The difference in the distribution of beta values for type I and type II probes was corrected for using the SWAN normalization method (Maksimovic et al. 2012). Detection *P*-values were obtained for every genomic position in every sample. Failed positions were defined as signal levels lower than background from both the methylated and unmethylated channels. Samples with non-significant detection *p*-values ( $> 0.01$ ) in more than 10% of the probes were discarded. Using MixupMapper we also corrected for mixups in the methylation data (Westra et al. 2011). After SWAN normalization Beta-values were transformed to M-values:  $M = \log_2(\beta/1-\beta)$ . Further, we applied a principal component analysis (PCA) on the methylation correlation matrix to correct for physiological or environmental variation (e.g. phenotype difference) as well as systematic experimental variation (e.g. batch and technical effect). In order to target the difference in the genetic variation of methylation, we removed the global variation in methylation by using the residual methylation for each probe after removing the optimal number of PCs. This optimum was determined based on the maximum number of *cis*-meQTLs.

### **Imputation of genome-wide genotyping data in EGCUT**

Imputing of unobserved genotypes was implemented in IMPUTE v2 (Howie et al. 2009) using The 1000 Genomes Project sequencing data (Phase 1) as a reference panel (Abecasis et al. 2012; <http://www.1000genomes.org/>). In the EGCUT dataset, the directly genotyped SNPs were coded as 0, 1 or 2, while the imputed SNP dosage values were called at a 0.95 confidence level, ranging between 0 and 2. SNPs with an imputation quality  $< 0.4$ .

### **Assessment of age as a confounder of DNA methylation level in *CDH13* promoter region**

Prior association testing with genetic and cardio-metabolic parameters, the subject's age was assessed as a potential covariate modulating DNA methylation at the studied 46 CpG sites/sites in HYPEST and CADCZ. Results of association testing with age (linear regression; gender, experiment series as cofactors) were combined in a meta-analysis using the inverse-variance method under a fixed-effects model implemented in R, ver. 3.0.2 (R Development Core Team 2014, <http://www.r-project.org/>). None of the CpG methylation – age nominal associations ( $P < 0.05$ ) remained significant after multiple testing correction ( $\alpha = 5.4 \times 10^{-4}$ ) (Table S5).

### **Analysis of the GT-microsatellite located within the *CDH13* promoter CpG island**

The CpG island of *CDH13* harbors a polymorphic GT-microsatellite (hg19, Chr16: 82,660,943-82,660,986). Fragment analysis was performed for the accurate determination of the length of microsatellite alleles for the resequenced HYPEST and CADCZ subjects (n=358). PCR reaction (15  $\mu$ l) contained 0.25 mM of each dNTPs, 1X B1 PCR buffer, 2.5 mM MgCl<sub>2</sub> and 0.375 units of HOT FIREPol DNA Polymerase (Solis BioDyne, Estonia), 0.25  $\mu$ M of both primers (forward: 5'-6-FAM-CCCGTTTCTGCATTCGGATC-3', reverse 5'-TTGATGTGGGCGAGAATGTC-3') and 75 ng of template DNA. The microsatellite amplification was performed under following conditions: initial denaturation at 95°C for 13 min, followed by 10 'touchdown' cycles of 95°C for 30s, and annealing from 60°C to 51°C for 30s, and 72°C for 1 min, then an additional 25 cycles of 95°C for 30s, 50°C for 30s and 72°C for 1 min. The reaction was ended by final incubation of 72°C for 10 min. GeneAmp 2700 (Applied Biosciences, USA) instruments were used. PCR products were diluted in formamide, mixed with the GeneScan™ 600 LIZ® size standard and analyzed for the fragment length with 3730xl DNA Analyzer (Applied Biosystems).

In subsequent data analysis the study subjects were divided into two groups based on the determined length of their microsatellite alleles (**Figure S4**). Individuals carrying one or two extremely long ( $\geq 299$  bp; HYPEST, n=18; CADCZ, n=29) alleles formed the 'long allele' group, subjects with two  $< 299$  bp alleles formed the 'normal allele' group. The effect of the microsatellite length on methylation level on neighboring CpG sites/unites was tested using logistic regression implemented in R software. Age and gender were used as covariates in all analyses. Length of the microsatellite showed no evidence of association with DNA methylation (data not presented).

**Table S1.** Sequences of oligonucleotide primers

|                           | Primer ID                 | Sequence 5' - 3' <sup>a</sup>                              | PCR product length (bp) | CpG-site coverage |
|---------------------------|---------------------------|------------------------------------------------------------|-------------------------|-------------------|
| A. DNA methylation assays | CDH13_assay1_F            | aggaagagagTTTTTTTGTATTAGGTTGGAAGTGG                        | 289                     | CpG_1-13          |
|                           | CDH13_assay1_R            | cagtaatacactcactatagggagaaggctCCAAATAAATCAACAACAACATCAC    |                         |                   |
|                           | CDH13_assay2_F            | aggaagagagGGGAGGAGGAGAGAGTTTTTAG                           | 470                     | CpG_51-90         |
|                           | CDH13_assay2_R            | cagtaatacactcactatagggagaaggctAAACTCCAATAACTAAACAATAAAAATA |                         |                   |
|                           | CDH13_assay3_F            | aggaagagagGTTAGAGTGGGAGTTTTGTGTGTGG                        | 339                     | CpG_15-45         |
|                           | CDH13_assay3_R            | cagtaatacactcactatagggagaaggctACAAAACCTCTCCTCAAAACCTAAC    |                         |                   |
|                           | CDH13_assay4_F            | aggaagagagGGTTTTGTTTTGTTTTGTTTTTATT                        | 438                     | CpG_91-116        |
|                           | CDH13_assay4_R            | cagtaatacactcactatagggagaaggctCACCCCTATTATCCAACCAACTAA     |                         |                   |
| B. Sequencing primers     | CDH13_F1                  | TGGTCCATTGCTCAGTGTCTGC <sup>b</sup>                        | 2602                    | NA                |
|                           | CDH13_R1                  | TGCACCAGTCTCCCCATCCCA <sup>b</sup>                         |                         |                   |
|                           | CDH13_seqF2               | CAGCTTTGGTGCCAGATGCACA                                     |                         |                   |
|                           | CDH13_seqF3               | GCCATTGGTCTGGTCATCAGCC                                     |                         |                   |
|                           | CDH13_seqF4               | GGGTAACCTTTGGTTCCCTCCTCCG                                  |                         |                   |
|                           | CDH13_seqF5               | CTGCTGCCTTCCCTGAGCGG                                       |                         |                   |
|                           | CDH13_seqR2               | TTTCTCTGCGCTCCGCTCCC                                       |                         |                   |
|                           | CDH13_seqR3               | GCCCCGATCTGTCTTCGCCG                                       |                         |                   |
| CDH13_seqR4               | AATTGCACGGGGGACTGGCG      |                                                            |                         |                   |
| CDH13_seqR5               | ACCTCCAGGTAICTCAGAACAGCAG |                                                            |                         |                   |

Methylation assays were designed using EpiDesigner software as instructed by the manufacturer. Sequencing primers were designed with MPrimer3 software (<http://bioinfo.ut.ee/mprimer3/>).

<sup>a</sup>Tags in lower case letters, forward 10mer tag to balance the PCR; reverse T7-promoter tag for in vitro transcription and 8bp insert to prevent abortive cycling

<sup>b</sup>Initial long-range PCR primers

**Table S2.** CpG-sites targeted for methylation measurement with Sequenom MassARRAY EpiTYPER™ application

| CpG site/unit | Position on chr.16<br>GRCh37/hg19 <sup>a</sup> | Final association<br>testing | Reason for exclusion <sup>b</sup> |
|---------------|------------------------------------------------|------------------------------|-----------------------------------|
| CpG_1         | 82,660,317                                     | +                            |                                   |
| CpG_2         | 82,660,328                                     | +                            |                                   |
| CpG_3         | 82,660,376                                     | +                            |                                   |
| CpG_4-8       | 82,660,432-82,660,450                          | -                            | Fragment with too high mass       |
| CpG_9         | 82,660,464                                     | +                            |                                   |
| CpG_10        | 82,660,482                                     | -                            | Fragment with too low mass        |
| CpG_11        | 82,660,490                                     | +                            |                                   |
| CpG_12        | 82,660,505                                     | +                            |                                   |
| CpG_13        | 82,660,554                                     | +                            |                                   |
| CpG_14        | 82,660,596                                     | -                            | Not covered by assays             |
| CpG_15        | 82,660,630                                     | +                            |                                   |
| CpG_16-17     | 82,660,652-82,660,654                          | +                            |                                   |
| CpG_18-21     | 82,660,670-82,660,680                          | -                            | Overlapping mass with CpG_33-35   |
| CpG_22        | 82,660,690                                     | +                            |                                   |
| CpG_23        | 82,660,705                                     | +                            |                                   |
| CpG_24        | 82,660,714                                     | -                            | Removed after QC                  |
| CpG_25        | 82,660,718                                     | -                            | Fragment with too low mass        |
| CpG_26        | 82,660,727                                     | -                            | Fragment with too low mass        |
| CpG_27-29     | 82,660,761-82,660,767                          | +                            |                                   |
| CpG_30-31     | 82,660,774-82,660,779                          | +                            |                                   |
| CpG_32        | 82,660,791                                     | +                            |                                   |
| CpG_33-35     | 82,660,796-82,660,805                          | -                            | Overlapping mass with CpG_18-21   |
| CpG_36        | 82,660,826                                     | +                            |                                   |
| CpG_37        | 82,660,834                                     | +                            |                                   |
| CpG_38        | 82,660,843                                     | +                            |                                   |

|           |                       |   |                                 |
|-----------|-----------------------|---|---------------------------------|
| CpG_39-42 | 82,660,847-82,660,855 | + |                                 |
| CpG_43    | 82,660,866            | + |                                 |
| CpG_44    | 82,660,873            | - | Fragment with too low mass      |
| CpG_45    | 82,660,890            | + |                                 |
| CpG_46-50 | 82,660,938-82,660,998 | - | Not covered by assays           |
| CpG_51    | 82,661,041            | - | Removed after QC                |
| CpG_52    | 82,661,050            | + |                                 |
| CpG_53    | 82,661,087            | + |                                 |
| CpG_54    | 82,661,095            | + |                                 |
| CpG_55    | 82,661,125            | - | Removed after QC                |
| CpG_56    | 82,661,134            | - | Fragment with too low mass      |
| CpG_57-58 | 82,661,139-82,661,141 | + |                                 |
| CpG_59    | 82,661,159            | - | Duplicate mass with CpG_82      |
| CpG_60-61 | 82,661,166-82,661,170 | - | Overlapping mass with CpG_65    |
| CpG_62-64 | 82,661,175-82,661,188 | + |                                 |
| CpG_65    | 82,661,195            | - | Overlapping mass with CpG_60-61 |
| CpG_66    | 82,661,202            | + |                                 |
| CpG_67    | 82,661,217            | + |                                 |
| CpG_68    | 82,661,231            | - | Fragment with too low mass      |
| CpG_69-70 | 82,661,244-82,661,248 | + |                                 |
| CpG_71-72 | 82,661,267-82,661,275 | + |                                 |
| CpG_73-74 | 82,661,285-82,661,290 | + |                                 |
| CpG_75-76 | 82,661,313-82,661,326 | + |                                 |
| CpG_77-81 | 82,661,336-82,661,349 | + |                                 |
| CpG_82    | 82,661,355            | - | Duplicate mass with CpG_59      |
| CpG_83    | 82,661,360            | + |                                 |
| CpG_84-85 | 82,661,384-82,661,390 | + |                                 |
| CpG_86    | 82,661,399            | + |                                 |

|             |                       |   |                                 |
|-------------|-----------------------|---|---------------------------------|
| CpG_87-88   | 82,661,404-82,661,413 | + |                                 |
| CpG_89      | 82,661,421            | + |                                 |
| CpG_90      | 82,661,438            | + |                                 |
| CpG_91      | 82,661,469            | + |                                 |
| CpG_92      | 82,661,480            | + |                                 |
| CpG_93      | 82,661,488            | - | Removed after QC                |
| CpG_94-96   | 82,661,510-82,661,521 | - | Fragment with too high mass     |
| CpG_97      | 82,661,550            | - | Removed after QC                |
| CpG_98-103  | 82,661,580-82,661,622 | - | Fragment with too high mass     |
| CpG_104     | 82,661,633            | + |                                 |
| CpG_105     | 82,661,638            | - | Removed after QC                |
| CpG_106     | 82,661,670            | + |                                 |
| CpG_107     | 82,661,696            | + |                                 |
| CpG_108     | 82,661,701            | + |                                 |
| CpG_109     | 82,661,725            | + |                                 |
| CpG_110-111 | 82,661,730-82,661,739 | - | Duplicate mass with CpG_113-114 |
| CpG_112     | 82,661,746            | - | Removed after QC                |
| CpG_113-114 | 82,661,769-82,661,781 | - | Duplicate mass with CpG_110-111 |
| CpG_115     | 82,661,797            | - | Removed after QC                |
| CpG_116     | 82,661,812            | + |                                 |

---

<sup>a</sup>In case of CpG-units, the positions of the first and last CpG-sites in the unit

<sup>b</sup>Described in Materials and methods



**Table S3.** CpG sites overlapping in HYPEST, CAD CZ and EGCUT datasets

| Position on chr.16<br>GRCh37/hg19 | CpG code in<br>HYPEST/CADCZ | CpG code in<br>EGCUT |
|-----------------------------------|-----------------------------|----------------------|
| 82,660,317                        | CpG_1                       | cg02069674           |
| 82,660,328                        | CpG_2                       | cg01880569           |
| 82,660,376                        | CpG_3                       | cg00423443           |
| 82,660,464                        | CpG_9                       | cg07301944           |
| 82,660,490                        | CpG_11                      | cg08977371           |
| 82,660,505                        | CpG_12                      | cg09825093           |
| 82,660,630                        | CpG_15                      | cg01301138           |
| 82,661,725                        | CpG_109                     | cg19369556           |

**Table S4.** LD ( $r^2$ ) between common SNPs identified by resequencing in HYPEST and CAD CZ and previously known SNPs associated with cardio-

| SNP A      | Position of SNP A <sup>a</sup> | SNP B      | Position of SNP B | Trait SNP B has been associated with            | $r^2$       |
|------------|--------------------------------|------------|-------------------|-------------------------------------------------|-------------|
| rs12443878 | 82,659,933                     | rs10514542 | 82,557,684        | total cholesterol level                         | 0.00112203  |
| rs12443878 | 82,659,933                     | rs11646213 | 82,642,651        | hypertension, metabolic syndrome, pre-eclampsia | 0.666202    |
| rs12443878 | 82,659,933                     | rs12444338 | 82,660,155        | hypertension                                    | 0.775768    |
| rs12443878 | 82,659,933                     | rs12922394 | 82,672,327        | adiponectin level                               | 8.70E-06    |
| rs12443878 | 82,659,933                     | rs4783244  | 82,662,268        | adiponectin level                               | 0.490769    |
| rs12443878 | 82,659,933                     | rs62040565 | 82,660,946        |                                                 | 0.554124    |
| rs12443878 | 82,659,933                     | rs6565105  | 83,065,664        | LDL level                                       | 0.00913971  |
| rs12443878 | 82,659,933                     | rs7195409  | 83,527,592        | adiponectin level                               | 0.00484313  |
| rs12443878 | 82,659,933                     | rs8055236  | 83,212,398        | coronary artery disease                         | 2.69E-05    |
| rs12443878 | 82,659,933                     | rs8060301  | 82,661,744        |                                                 | 0.473274    |
| rs12443878 | 82,659,933                     | rs12596316 | 82,646,152        | adiponectin level                               | 0.663666    |
| rs12443878 | 82,659,933                     | rs3852724  | 82,646,094        | adiponectin level                               | 0.223743    |
| rs12443878 | 82,659,933                     | rs3865185  | 82,646,462        | adiponectin level                               | 0.223743    |
| rs12443878 | 82,659,933                     | rs3865186  | 82,646,972        | adiponectin level                               | 0.215396    |
| rs12443878 | 82,659,933                     | rs3865188  | 82,650,717        | adiponectin level                               | 0.797744    |
| rs12443878 | 82,659,933                     | rs7193788  | 82,656,160        | adiponectin level                               | 0.268075    |
| rs12443878 | 82,659,933                     | rs8053728  | 82,485,251        | adiponectin level                               | 0.000300612 |
| rs12444338 | 82,660,155                     | rs10514542 | 82,557,684        |                                                 | 0.0478803   |
| rs12444338 | 82,660,155                     | rs11646213 | 82,642,651        |                                                 | 0.485736    |
| rs12444338 | 82,660,155                     | rs12922394 | 82,672,327        |                                                 | 0.0338514   |
| rs12444338 | 82,660,155                     | rs4783244  | 82,662,268        |                                                 | 0.676577    |
| rs12444338 | 82,660,155                     | rs62040565 | 82,660,946        |                                                 | 0.439904    |
| rs12444338 | 82,660,155                     | rs6565105  | 83,065,664        |                                                 | 0.0132675   |
| rs12444338 | 82,660,155                     | rs7195409  | 83,527,592        |                                                 | 0.000325375 |
| rs12444338 | 82,660,155                     | rs8055236  | 83,212,398        |                                                 | 4.90E-07    |
| rs12444338 | 82,660,155                     | rs8060301  | 82,661,744        |                                                 | 0.651728    |
| rs12444338 | 82,660,155                     | rs12596316 | 82,646,152        |                                                 | 0.803393    |
| rs12444338 | 82,660,155                     | rs3852724  | 82,646,094        |                                                 | 0.0502016   |
| rs12444338 | 82,660,155                     | rs3865185  | 82,646,462        |                                                 | 0.0502016   |
| rs12444338 | 82,660,155                     | rs3865186  | 82,646,972        |                                                 | 0.0455023   |
| rs12444338 | 82,660,155                     | rs3865188  | 82,650,717        |                                                 | 0.950897    |

|            |            |            |            |             |
|------------|------------|------------|------------|-------------|
| rs12444338 | 82,660,155 | rs7193788  | 82,656,160 | 0.11109     |
| rs12444338 | 82,660,155 | rs8053728  | 82,485,251 | 0.00146287  |
| rs62040565 | 82,660,946 | rs10514542 | 82,557,684 | 0.000706188 |
| rs62040565 | 82,660,946 | rs11646213 | 82,642,651 | 0.392202    |
| rs62040565 | 82,660,946 | rs12596316 | 82,646,152 | 0.329218    |
| rs62040565 | 82,660,946 | rs3852724  | 82,646,094 | 0.141232    |
| rs62040565 | 82,660,946 | rs3865185  | 82,646,462 | 0.141232    |
| rs62040565 | 82,660,946 | rs3865186  | 82,646,972 | 0.128909    |
| rs62040565 | 82,660,946 | rs3865188  | 82,650,717 | 0.439904    |
| rs62040565 | 82,660,946 | rs12922394 | 82,672,327 | 0.00673134  |
| rs62040565 | 82,660,946 | rs4783244  | 82,662,268 | 0.276115    |
| rs62040565 | 82,660,946 | rs6565105  | 83,065,664 | 0.000287672 |
| rs62040565 | 82,660,946 | rs7195409  | 83,527,592 | 0.00190484  |
| rs62040565 | 82,660,946 | rs8055236  | 83,212,398 | 0.000379176 |
| rs62040565 | 82,660,946 | rs8060301  | 82,661,744 | 0.269388    |
| rs62040565 | 82,660,946 | rs7193788  | 82,656,160 | 0.128349    |
| rs62040565 | 82,660,946 | rs8053728  | 82,485,251 | 0.00247931  |
| rs8060301  | 82,661,744 | rs10514542 | 82,557,684 | 0.00781923  |
| rs8060301  | 82,661,744 | rs11646213 | 82,642,651 | 0.325643    |
| rs8060301  | 82,661,744 | rs12596316 | 82,646,152 | 0.528015    |
| rs8060301  | 82,661,744 | rs3852724  | 82,646,094 | 0.0214908   |
| rs8060301  | 82,661,744 | rs3865185  | 82,646,462 | 0.0214908   |
| rs8060301  | 82,661,744 | rs3865186  | 82,646,972 | 0.0194557   |
| rs8060301  | 82,661,744 | rs3865188  | 82,650,717 | 0.671102    |
| rs8060301  | 82,661,744 | rs7193788  | 82,656,160 | 0.0903346   |
| rs8060301  | 82,661,744 | rs8053728  | 82,485,251 | 6.74E-05    |
| rs8060301  | 82,661,744 | rs12922394 | 82,672,327 | 0.0482887   |
| rs8060301  | 82,661,744 | rs4783244  | 82,662,268 | 0.97755     |
| rs8060301  | 82,661,744 | rs6565105  | 83,065,664 | 0.00459503  |
| rs8060301  | 82,661,744 | rs7195409  | 83,527,592 | 0.00125748  |
| rs8060301  | 82,661,744 | rs8055236  | 83,212,398 | 0.0031027   |

<sup>a</sup> Genomic position on chromosome 16 (GRCh37/hg19).

**Table S5.** Assessment of age as a potential covariate affecting DNA methylation level - association testing between *CDH13* DNA methylation at 46 CpG sites/units with age among HYPEST and CADCZ study subjects.

| CpG site/unit <sup>a</sup> | Position at chr.16 <sup>b</sup> | HYPEST       |             |              |             |                              |
|----------------------------|---------------------------------|--------------|-------------|--------------|-------------|------------------------------|
|                            |                                 | Beta         | SE          | CI_2.5%      | CI_97.5%    | <i>P</i> -value <sup>c</sup> |
| CpG_1                      | 82,660,317                      | 0.123530606  | 0.111189983 | -0.094397757 | 0.341458969 | 0.268363584                  |
| CpG_2                      | 82,660,328                      | -0.075080105 | 0.113001526 | -0.296559026 | 0.146398816 | 0.507464508                  |
| CpG_3                      | 82,660,376                      | -0.01199093  | 0.086487661 | -0.18150363  | 0.15752177  | 0.889921817                  |
| CpG_9                      | 82,660,464                      | 0.108083079  | 0.059695514 | -0.008917978 | 0.225084137 | 0.072208292                  |
| CpG_11                     | 82,660,490                      | 0.094646396  | 0.121185098 | -0.14287203  | 0.332164823 | 0.436107752                  |
| CpG_12                     | 82,660,505                      | -0.007599618 | 0.042869718 | -0.091622721 | 0.076423485 | 0.859531991                  |
| CpG_13                     | 82,660,554                      | 0.000882758  | 0.020352111 | -0.039006647 | 0.040772162 | 0.965460882                  |
| CpG_15                     | 82,660,630                      | 0.053754357  | 0.024103988 | 0.006511409  | 0.100997305 | 0.027245789                  |
| CpG_16-17                  | 82,660,652-82,660,654           | -0.006805114 | 0.028139905 | -0.061958314 | 0.048348086 | 0.80924552                   |
| CpG_22                     | 82,660,690                      | 0.071276043  | 0.036052175 | 0.000615079  | 0.141937007 | 0.049896832                  |
| CpG_23                     | 82,660,705                      | 0.024095765  | 0.018462135 | -0.012089355 | 0.060280886 | 0.193868924                  |
| CpG_27-29                  | 82,660,761-82,660,767           | -0.023273906 | 0.032389211 | -0.086755592 | 0.040207781 | 0.473578544                  |
| CpG_30-31                  | 82,660,774-82,660,779           | -0.005066314 | 0.007728085 | -0.020213082 | 0.010080455 | 0.513117529                  |
| CpG_32                     | 82,660,791                      | -0.060440848 | 0.036412146 | -0.131807342 | 0.010925647 | 0.099306635                  |
| CpG_36                     | 82,660,826                      | 0.03578648   | 0.047330864 | -0.056980308 | 0.128553268 | 0.450911463                  |
| CpG_37                     | 82,660,834                      | -0.001127509 | 0.010483729 | -0.021675241 | 0.019420223 | 0.914499514                  |
| CpG_38                     | 82,660,843                      | 0.044910455  | 0.056521296 | -0.065869249 | 0.155690159 | 0.428186264                  |
| CpG_39-42                  | 82,660,847-82,660,855           | 0.035404015  | 0.032413865 | -0.028125992 | 0.098934023 | 0.276535068                  |
| CpG_43                     | 82,660,866                      | -0.05743231  | 0.08742592  | -0.228783965 | 0.113919346 | 0.5122491                    |
| CpG_45                     | 82,660,890                      | -0.088744573 | 0.076630541 | -0.238937672 | 0.061448527 | 0.248695321                  |
| CpG_52                     | 82,661,050                      | -0.010720618 | 0.05295688  | -0.114514196 | 0.09307296  | 0.83987268                   |
| CpG_53                     | 82,661,087                      | -0.042906088 | 0.092189295 | -0.223593786 | 0.137781611 | 0.643002611                  |
| CpG_54                     | 82,661,095                      | -0.012946121 | 0.064825533 | -0.14000183  | 0.114109589 | 0.842010141                  |
| CpG_57-58                  | 82,661,139-82,661,141           | 0.02637258   | 0.108986585 | -0.187237201 | 0.239982362 | 0.809176922                  |
| CpG_62-64                  | 82,661,175-82,661,188           | 0.049730328  | 0.073710917 | -0.094740415 | 0.19420107  | 0.50117436                   |
| CpG_66                     | 82,661,202                      | 0.117449905  | 0.062352684 | -0.00475911  | 0.239658919 | 0.061749011                  |
| CpG_67                     | 82,661,217                      | 0.046485501  | 0.02523284  | -0.002969956 | 0.095940958 | 0.067614777                  |

|           |                       |              |             |              |              |             |
|-----------|-----------------------|--------------|-------------|--------------|--------------|-------------|
| CpG_69-70 | 82,661,244-82,661,248 | -0.013126538 | 0.036979401 | -0.085604833 | 0.059351757  | 0.723183715 |
| CpG_71-72 | 82,661,267-82,661,275 | -0.003647646 | 0.039489504 | -0.081045652 | 0.07375036   | 0.926544098 |
| CpG_73-74 | 82,661,285-82,661,290 | 0.00557398   | 0.023600005 | -0.040681179 | 0.051829139  | 0.813652038 |
| CpG_75-76 | 82,661,313-82,661,326 | 0.047108978  | 0.03702009  | -0.025449065 | 0.119667022  | 0.205511581 |
| CpG_77-81 | 82,661,336-82,661,349 | 0.056317666  | 0.036046039 | -0.014331273 | 0.126966605  | 0.120556764 |
| CpG_83    | 82,661,360            | -0.011799148 | 0.127533568 | -0.261760349 | 0.238162052  | 0.926425721 |
| CpG_84-85 | 82,661,384-82,661,390 | -0.075329113 | 0.113002855 | -0.296810638 | 0.146152413  | 0.506201056 |
| CpG_86    | 82,661,399            | 0.220611227  | 0.218574264 | -0.207786459 | 0.649008913  | 0.314640596 |
| CpG_87-88 | 82,661,404-82,661,413 | -0.051502037 | 0.088167101 | -0.224306379 | 0.121302305  | 0.560114775 |
| CpG_89    | 82,661,421            | -0.034253899 | 0.056669748 | -0.145324564 | 0.076816766  | 0.546813769 |
| CpG_90    | 82,661,438            | -0.126867568 | 0.057456355 | -0.239479954 | -0.014255183 | 0.028902462 |
| CpG_91    | 82,661,469            | -0.076579185 | 0.14964965  | -0.369887109 | 0.216728739  | 0.610220156 |
| CpG_92    | 82,661,480            | 0.019486136  | 0.030777593 | -0.040836838 | 0.07980911   | 0.528412307 |
| CpG_104   | 82,661,633            | 0.109957763  | 0.128097688 | -0.141109092 | 0.361024618  | 0.393274147 |
| CpG_106   | 82,661,670            | -0.087158964 | 0.096080766 | -0.275473805 | 0.101155877  | 0.366989477 |
| CpG_107   | 82,661,696            | -0.070606906 | 0.058136514 | -0.18455238  | 0.043338567  | 0.228128904 |
| CpG_108   | 82,661,701            | -0.463092994 | 0.2904138   | -1.032293584 | 0.106107595  | 0.115182989 |
| CpG_109   | 82,661,725            | 0.039740901  | 0.039539897 | -0.037755874 | 0.117237675  | 0.317813354 |
| CpG_116   | 82,661,812            | 0.005455072  | 0.194959513 | -0.376658552 | 0.387568695  | 0.977745661 |

|                            |                                 | CAD CZ       |             |              |              |                 |
|----------------------------|---------------------------------|--------------|-------------|--------------|--------------|-----------------|
| CpG site/unit <sup>a</sup> | Position at chr.16 <sup>b</sup> | Beta         | SE          | CI_2.5%      | CI_97.5%     | <i>P</i> -value |
| CpG_1                      | 82,660,317                      | 0.329957615  | 0.173750449 | -0.010587008 | 0.670502238  | 0.059442587     |
| CpG_2                      | 82,660,328                      | 0.139969192  | 0.169078201 | -0.191417991 | 0.471356376  | 0.409052201     |
| CpG_3                      | 82,660,376                      | 0.09231098   | 0.145642926 | -0.193143909 | 0.377765869  | 0.527146586     |
| CpG_9                      | 82,660,464                      | 0.062443943  | 0.223030098 | -0.374687017 | 0.499574904  | 0.779868648     |
| CpG_11                     | 82,660,490                      | -0.060770043 | 0.154208542 | -0.363013231 | 0.241473145  | 0.694087593     |
| CpG_12                     | 82,660,505                      | 0.112517277  | 0.075742398 | -0.035935095 | 0.26096965   | 0.139448841     |
| CpG_13                     | 82,660,554                      | -0.028860607 | 0.047894343 | -0.122731795 | 0.065010582  | 0.547668408     |
| CpG_15                     | 82,660,630                      | -0.059502274 | 0.077367385 | -0.211139562 | 0.092135015  | 0.443058894     |
| CpG_16-17                  | 82,660,652-82,660,654           | -0.050058202 | 0.09285742  | -0.232055402 | 0.131938997  | 0.590631604     |
| CpG_22                     | 82,660,690                      | 0.013214173  | 0.097155727 | -0.177207553 | 0.203635898  | 0.891996778     |
| CpG_23                     | 82,660,705                      | -0.06659232  | 0.118485131 | -0.298818909 | 0.165634269  | 0.574939372     |
| CpG_27-29                  | 82,660,761-82,660,767           | -0.160926048 | 0.066915554 | -0.292078124 | -0.029773971 | 0.017455547     |
| CpG_30-31                  | 82,660,774-82,660,779           | -0.074858244 | 0.076950604 | -0.225678657 | 0.075962168  | 0.332235473     |
| CpG_32                     | 82,660,791                      | -0.160373062 | 0.073567632 | -0.304562971 | -0.016183153 | 0.031022025     |
| CpG_36                     | 82,660,826                      | -0.062933298 | 0.077391099 | -0.214617065 | 0.08875047   | 0.417463733     |
| CpG_37                     | 82,660,834                      | -0.026063414 | 0.023791734 | -0.072694356 | 0.020567528  | 0.275073142     |
| CpG_38                     | 82,660,843                      | -0.265776556 | 0.103696875 | -0.469018697 | -0.062534416 | 0.011464392     |
| CpG_39-42                  | 82,660,847-82,660,855           | -0.039816188 | 0.151539138 | -0.336827441 | 0.257195064  | 0.793190122     |
| CpG_43                     | 82,660,866                      | -0.300541686 | 0.341168072 | -0.96921882  | 0.368135447  | 0.379780007     |
| CpG_45                     | 82,660,890                      | -0.05364061  | 0.100071535 | -0.249777215 | 0.142495996  | 0.592747579     |
| CpG_52                     | 82,661,050                      | -0.038764559 | 0.049636953 | -0.136051198 | 0.058522081  | 0.436089474     |
| CpG_53                     | 82,661,087                      | 0.145320805  | 0.087943907 | -0.027046086 | 0.317687696  | 0.100771662     |
| CpG_54                     | 82,661,095                      | -0.046329359 | 0.050997963 | -0.146283529 | 0.053624812  | 0.365134959     |
| CpG_57-58                  | 82,661,139-82,661,141           | 0.029236276  | 0.063153351 | -0.094542018 | 0.153014569  | 0.644120354     |
| CpG_62-64                  | 82,661,175-82,661,188           | 0.023705278  | 0.057973856 | -0.089921392 | 0.137331948  | 0.683259164     |
| CpG_66                     | 82,661,202                      | 0.141924752  | 0.100254685 | -0.05457082  | 0.338420324  | 0.159024647     |
| CpG_67                     | 82,661,217                      | 0.07269912   | 0.08564236  | -0.095156822 | 0.240555062  | 0.397373134     |

|           |                       |              |             |              |             |             |
|-----------|-----------------------|--------------|-------------|--------------|-------------|-------------|
| CpG_69-70 | 82,661,244-82,661,248 | 0.00852209   | 0.042217322 | -0.074222341 | 0.09126652  | 0.840323735 |
| CpG_71-72 | 82,661,267-82,661,275 | -0.130233183 | 0.069281228 | -0.266021895 | 0.00555553  | 0.062216707 |
| CpG_73-74 | 82,661,285-82,661,290 | -0.119861162 | 0.107391391 | -0.33034442  | 0.090622095 | 0.266284832 |
| CpG_75-76 | 82,661,313-82,661,326 | 0.049607158  | 0.07274165  | -0.092963856 | 0.192178172 | 0.496439028 |
| CpG_77-81 | 82,661,336-82,661,349 | 0.049828726  | 0.051970828 | -0.052032224 | 0.151689677 | 0.339321126 |
| CpG_83    | 82,661,360            | 0.061167682  | 0.109378999 | -0.153211216 | 0.275546581 | 0.576875567 |
| CpG_84-85 | 82,661,384-82,661,390 | -0.06306398  | 0.098800648 | -0.256709691 | 0.130581731 | 0.524309598 |
| CpG_86    | 82,661,399            | 0.017066168  | 0.124375053 | -0.226704457 | 0.260836794 | 0.891049609 |
| CpG_87-88 | 82,661,404-82,661,413 | 0.014530789  | 0.096604858 | -0.174811253 | 0.203872832 | 0.880649414 |
| CpG_89    | 82,661,421            | -0.056198673 | 0.077584798 | -0.208262082 | 0.095864737 | 0.470067354 |
| CpG_90    | 82,661,438            | 0.134279972  | 0.088100092 | -0.038393036 | 0.306952979 | 0.129628148 |
| CpG_91    | 82,661,469            | -0.034654652 | 0.057472935 | -0.147299534 | 0.077990231 | 0.547523256 |
| CpG_92    | 82,661,480            | -0.072778392 | 0.068709262 | -0.20744607  | 0.061889287 | 0.291376104 |
| CpG_104   | 82,661,633            | -0.067476459 | 0.206436962 | -0.472085469 | 0.337132552 | 0.744301801 |
| CpG_106   | 82,661,670            | -0.047909198 | 0.078000546 | -0.200787459 | 0.104969062 | 0.540098602 |
| CpG_107   | 82,661,696            | -0.046729874 | 0.076916661 | -0.197483759 | 0.10402401  | 0.544569568 |
| CpG_108   | 82,661,701            | 0.102156128  | 0.189005497 | -0.268287838 | 0.472600095 | 0.58978198  |
| CpG_109   | 82,661,725            | -0.230513844 | 0.13687443  | -0.498782797 | 0.037755108 | 0.094451004 |
| CpG_116   | 82,661,812            | 0.118161297  | 0.13672997  | -0.14982452  | 0.386147114 | 0.389002666 |

| CpG site/unit <sup>a</sup> | Position at chr.16 <sup>b</sup> | Meta-analysis <sup>d</sup> |             |              |             |             |
|----------------------------|---------------------------------|----------------------------|-------------|--------------|-------------|-------------|
|                            |                                 | Beta                       | SE          | CI_2.5%      | CI_97.5%    | P-value     |
| CpG_1                      | 82,660,317                      | 0.183506079                | 0.093654667 | -5.37E-05    | 0.367065853 | 0.050067055 |
| CpG_2                      | 82,660,328                      | -8.68E-03                  | 0.093950367 | -0.192820707 | 0.175457965 | 0.926377221 |
| CpG_3                      | 82,660,376                      | 0.015201056                | 0.074364118 | -0.130549937 | 0.160952049 | 0.838030105 |
| CpG_9                      | 82,660,464                      | 0.105032078                | 0.05766564  | -0.007990499 | 0.218054655 | 0.068546386 |
| CpG_11                     | 82,660,490                      | 0.035310538                | 0.095283679 | -0.151442041 | 0.222063117 | 0.710947937 |
| CpG_12                     | 82,660,505                      | 0.021543367                | 0.037308359 | -0.051579673 | 0.094666408 | 0.563641741 |
| CpG_13                     | 82,660,554                      | -0.003666376               | 0.018731086 | -0.04037863  | 0.033045878 | 0.844815648 |
| CpG_15                     | 82,660,630                      | 0.043733798                | 0.023012985 | -0.001370824 | 0.08883842  | 0.057381097 |
| CpG_16-17                  | 82,660,652-82,660,654           | -0.010447666               | 0.026930467 | -0.063230411 | 0.04233508  | 0.698053286 |
| CpG_22                     | 82,660,690                      | 0.064248667                | 0.033800126 | -0.001998362 | 0.130495696 | 0.057322834 |
| CpG_23                     | 82,660,705                      | 0.021946155                | 0.018241978 | -0.013807464 | 0.057699775 | 0.228953912 |
| CpG_27-29                  | 82,660,761-82,660,767           | -0.049402302               | 0.029153613 | -0.106542333 | 0.007737729 | 0.090160509 |
| CpG_30-31                  | 82,660,774-82,660,779           | -0.005767199               | 0.007691291 | -0.020841852 | 0.009307455 | 0.453354135 |
| CpG_32                     | 82,660,791                      | -0.080104454               | 0.032633658 | -0.144065248 | -0.01614366 | 0.014101886 |
| CpG_36                     | 82,660,826                      | 0.008913556                | 0.040378159 | -0.070226181 | 0.088053293 | 0.825285611 |
| CpG_37                     | 82,660,834                      | -0.005184098               | 0.009593605 | -0.023987218 | 0.013619022 | 0.588941792 |
| CpG_38                     | 82,660,843                      | -0.026250947               | 0.049627974 | -0.123519989 | 0.071018095 | 0.59683692  |
| CpG_39-42                  | 82,660,847-82,660,855           | 0.032113069                | 0.031696906 | -0.030011725 | 0.094237862 | 0.310998333 |
| CpG_43                     | 82,660,866                      | -0.072412715               | 0.084689481 | -0.238401047 | 0.093575617 | 0.392530168 |
| CpG_45                     | 82,660,890                      | -0.075768905               | 0.060841152 | -0.195015371 | 0.043477562 | 0.213000852 |
| CpG_52                     | 82,661,050                      | -0.025649144               | 0.036215482 | -0.096630185 | 0.045331897 | 0.478798101 |
| CpG_53                     | 82,661,087                      | 0.055641041                | 0.063633658 | -0.069078637 | 0.180360719 | 0.381902426 |
| CpG_54                     | 82,661,095                      | -0.033567185               | 0.040081528 | -0.112125536 | 0.044991166 | 0.402326921 |
| CpG_57-58                  | 82,661,139-82,661,141           | 0.02851645                 | 0.054642457 | -0.078580797 | 0.135613698 | 0.601758408 |
| CpG_62-64                  | 82,661,175-82,661,188           | 0.033651472                | 0.045568458 | -0.055661065 | 0.12296401  | 0.460221787 |
| CpG_66                     | 82,661,202                      | 0.124276494                | 0.052947604 | 0.020501096  | 0.228051891 | 0.018917134 |
| CpG_67                     | 82,661,217                      | 0.048579263                | 0.02420412  | 0.00114006   | 0.096018466 | 0.044742646 |



|           |                       |              |             |              |             |             |
|-----------|-----------------------|--------------|-------------|--------------|-------------|-------------|
| CpG_69-70 | 82,661,244-82,661,248 | -0.003728668 | 0.02781701  | -0.058249006 | 0.05079167  | 0.893368784 |
| CpG_71-72 | 82,661,267-82,661,275 | -0.034690568 | 0.034307747 | -0.101932517 | 0.03255138  | 0.311940597 |
| CpG_73-74 | 82,661,285-82,661,290 | -0.000208403 | 0.023049985 | -0.045385543 | 0.044968737 | 0.992786133 |
| CpG_75-76 | 82,661,313-82,661,326 | 0.047622935  | 0.032993155 | -0.017042461 | 0.11228833  | 0.148902577 |
| CpG_77-81 | 82,661,336-82,661,349 | 0.054210034  | 0.029619068 | -0.003842272 | 0.11226234  | 0.067213899 |
| CpG_83    | 82,661,360            | 0.0302431    | 0.083025981 | -0.132484832 | 0.192971032 | 0.715663361 |
| CpG_84-85 | 82,661,384-82,661,390 | -0.068377806 | 0.07438012  | -0.214160162 | 0.077404551 | 0.357937544 |
| CpG_86    | 82,661,399            | 0.066852374  | 0.108099392 | -0.145018542 | 0.278723289 | 0.536289083 |
| CpG_87-88 | 82,661,404-82,661,413 | -0.021494779 | 0.065122668 | -0.149132863 | 0.106143305 | 0.741350086 |
| CpG_89    | 82,661,421            | -0.041888591 | 0.045762166 | -0.131580788 | 0.047803605 | 0.360005706 |
| CpG_90    | 82,661,438            | -0.048939295 | 0.048126136 | -0.143264789 | 0.045386198 | 0.30920271  |
| CpG_91    | 82,661,469            | -0.040043505 | 0.053652239 | -0.145199962 | 0.065112951 | 0.455454254 |
| CpG_92    | 82,661,480            | 0.00406708   | 0.028088374 | -0.050985122 | 0.059119281 | 0.884872066 |
| CpG_104   | 82,661,633            | 0.060631066  | 0.108845363 | -0.152701926 | 0.273964057 | 0.577501076 |
| CpG_106   | 82,661,670            | -0.063501072 | 0.060557371 | -0.182191339 | 0.055189195 | 0.294357601 |
| CpG_107   | 82,661,696            | -0.061925696 | 0.046378931 | -0.152826731 | 0.028975338 | 0.181807034 |
| CpG_108   | 82,661,701            | -0.066025567 | 0.158411475 | -0.376506352 | 0.244455218 | 0.676826251 |
| CpG_109   | 82,661,725            | 0.018925199  | 0.037986661 | -0.055527287 | 0.093377686 | 0.618338535 |
| CpG_116   | 82,661,812            | 0.081004307  | 0.111943845 | -0.138401598 | 0.300410212 | 0.469301795 |

<sup>a</sup> Numbering and the precise localization of CpG sites/units within CDH13 promoter region is provided in Figure S2. CpG sites 1-15 are located upstream from CpG island, sites 16-116 are within the CpG island and sites 18-26 are in the first exon.

<sup>b</sup> Genomic position on chromosome 16 (GRCh37/hg19).

<sup>c</sup> Effects and P-values are calculated using linear regression, including gender and experiment series as covariates to the model. Effect of age is determined as increase or decrease in CpG site methylation level in percentile scale (1-100) per annum (0= no methylation; 100= full methylation; positive beta-values= gain of methylation; negative beta-values= loss of methylation).

<sup>d</sup> Results were combined using the inverse-variance method under fixed-effects model.  
SE, standard error; CI, confidence interval.

**Table S6.** SNP-s identified by promoter region resequencing

| SNP <sup>a</sup> | Position on chr.16 |                      | HYPEST                     |                         |                  | CADCZ                   |                  |
|------------------|--------------------|----------------------|----------------------------|-------------------------|------------------|-------------------------|------------------|
|                  | GRCh37/hg19        | Alleles <sup>b</sup> | Effect allele <sup>c</sup> | Effect allele frequency | HWE <sup>d</sup> | Effect allele frequency | HWE <sup>d</sup> |
| rs12443878       | 82,659,933         | C/A                  | A                          | 0.549                   | 0.56             | 0.488                   | 0.76             |
| rs2239857        | 82,659,943         | C/G                  | G                          | 0.042                   | 1                | 0.006                   | 1                |
| rs12444338       | 82,660,155         | G/T                  | T                          | 0.599                   | 0.88             | 0.44                    | 0.21             |
| rs185121433      | 82,660,173         | G/T                  | T                          | 0.018                   | 1                | 0.015                   | 1                |
| rs62040565       | 82,660,946         | T/C                  | C                          | 0.536                   | 0.47             | 0.484                   | 0.87             |
| rs113460564      | 82,661,424         | A/C                  | C                          | 0.008                   | 1                | 0.021                   | 1                |
| rs8060301        | 82,661,744         | T/A                  | A                          | 0.542                   | 0.38             | 0.413                   | 0.87             |
| ss947846714      | 82,661,524         | A/G                  | G                          | 0.003                   | 1                | nd                      |                  |
| ss947846715      | 82,661,651         | C/G                  | G                          | 0.005                   | 1                | nd                      |                  |
| rs77068073       | 82,661,877         | C/T                  | T                          | 0.010                   | 1                | nd                      |                  |
| rs118163260      | 82,660,452         | A/T                  | T                          | 0.003                   | 1                | nd                      |                  |
| rs139512845      | 82,661,409         | C/A                  | A                          | nd                      |                  | 0.006                   | 1                |
| rs111344280      | 82,659,615         | G/A                  | A                          | nd                      |                  | 0.009                   | 1                |
| ss947846716      | 82,661,268         | G/C                  | C                          | nd                      |                  | 0.006                   | 1                |

<sup>a</sup>For novel variants ss numbers are given.

<sup>b</sup>Major/minor allele according to UCSC Genome Browser. For novel variants major/minor allele according to population where it was identified.

<sup>c</sup>Effect allele in genetic association analysis.

<sup>d</sup>HWE,  $P$ -value of the  $X^2$ -test for Hardy-Weinberg-Equilibrium

nd, not defined

**Table S7.** Genetic association between rs8060301, rs12444338, rs62040565, rs12443878 genotypes and DNA methylation in the EGCUT sample-set

| SNP        | SNP position <sup>a</sup> | CpG site <sup>b</sup> | CpG site              |         | Tested |         | BETA   | SE      | CI_2.5%  | CI_97.5% | <i>P</i> -value <sup>c</sup> | FDR <sup>d</sup> |
|------------|---------------------------|-----------------------|-----------------------|---------|--------|---------|--------|---------|----------|----------|------------------------------|------------------|
|            |                           |                       | position <sup>a</sup> | SNPType | allele |         |        |         |          |          |                              |                  |
| rs8060301  | 82,661,744                | cg09415485            | 82,663,111            | A/T     | A      | -0.6816 | 0.0574 | -0.794  | -0.56912 | 1.53E-32 | 1.89E-30                     |                  |
| rs12444338 | 82,660,155                | cg09415485            | 82,663,111            | T/G     | T      | -0.572  | 0.0646 | -0.6986 | -0.44535 | 8.53E-19 | 5.29E-17                     |                  |
| rs12443878 | 82,659,933                | cg09415485            | 82,663,111            | A/C     | A      | -0.4856 | 0.0689 | -0.6205 | -0.35059 | 1.78E-12 | 7.36E-11                     |                  |
| rs62040565 | 82,660,946                | cg09415485            | 82,663,111            | C/T     | C      | -0.386  | 0.0727 | -0.5285 | -0.24354 | 1.10E-07 | 3.40E-06                     |                  |
| rs8060301  | 82,661,744                | cg19369556            | 82,661,725            | A/T     | A      | -0.346  | 0.0739 | -0.4909 | -0.20117 | 2.84E-06 | 7.04E-05                     |                  |
| rs12444338 | 82,660,155                | cg19369556            | 82,661,725            | T/G     | T      | -0.3102 | 0.0748 | -0.4568 | -0.16365 | 3.35E-05 | 0.0006915                    |                  |
| rs12443878 | 82,659,933                | cg19369556            | 82,661,725            | A/C     | A      | -0.2604 | 0.076  | -0.4094 | -0.11137 | 0.000615 | 0.0108978                    |                  |
| rs12443878 | 82,659,933                | cg09044981            | 82,827,677            | A/C     | A      | 0.25661 | 0.0762 | 0.10734 | 0.40588  | 0.000753 | 0.0116788                    |                  |
| rs8060301  | 82,661,744                | cg09044981            | 82,827,677            | A/T     | A      | 0.20308 | 0.0764 | 0.05336 | 0.3528   | 0.007848 | 0.108131                     |                  |
| rs12444338 | 82,660,155                | cg09044981            | 82,827,677            | T/G     | T      | 0.19923 | 0.0771 | 0.04807 | 0.35039  | 0.009787 | 0.1213644                    |                  |
| rs62040565 | 82,660,946                | cg09044981            | 82,827,677            | C/T     | C      | 0.18489 | 0.0774 | 0.03314 | 0.33664  | 0.016939 | 0.1909515                    |                  |
| rs12444338 | 82,660,155                | cg09825093            | 82,660,505            | T/G     | T      | 0.17768 | 0.0776 | 0.02567 | 0.32969  | 0.021965 | 0.2269741                    |                  |
| rs12443878 | 82,659,933                | cg02069674            | 82,660,317            | A/C     | A      | 0.15141 | 0.0776 | -0.0008 | 0.3036   | 0.051174 | 0.4250755                    |                  |
| rs12443878 | 82,659,933                | cg09825093            | 82,660,505            | A/C     | A      | 0.15083 | 0.0777 | -0.0015 | 0.30321  | 0.05237  | 0.4250755                    |                  |
| rs12443878 | 82,659,933                | cg08271366            | 82,816,457            | A/C     | A      | 0.15111 | 0.0772 | -0.0003 | 0.3025   | 0.050423 | 0.4250755                    |                  |
| rs12443878 | 82,659,933                | cg01880569            | 82,660,328            | A/C     | A      | 0.14536 | 0.0776 | -0.0067 | 0.29741  | 0.060973 | 0.4250755                    |                  |
| rs62040565 | 82,660,946                | cg09825093            | 82,660,505            | C/T     | C      | 0.1463  | 0.0779 | -0.0064 | 0.29895  | 0.060325 | 0.4250755                    |                  |
| rs62040565 | 82,660,946                | cg02069674            | 82,660,317            | C/T     | C      | 0.14565 | 0.078  | -0.0071 | 0.29843  | 0.061705 | 0.4250755                    |                  |
| rs62040565 | 82,660,946                | cg19369556            | 82,661,725            | C/T     | C      | -0.1401 | 0.0778 | -0.2927 | 0.01248  | 0.07191  | 0.4693103                    |                  |
| rs62040565 | 82,660,946                | cg07301944            | 82,660,464            | C/T     | C      | 0.13534 | 0.0779 | -0.0174 | 0.2881   | 0.082488 | 0.487074                     |                  |
| rs8060301  | 82,661,744                | cg07128660            | 82,474,489            | A/T     | A      | -0.1348 | 0.0772 | -0.2861 | 0.01644  | 0.080651 | 0.487074                     |                  |
| rs8060301  | 82,661,744                | cg02168291            | 82,671,520            | A/T     | A      | -0.1293 | 0.078  | -0.2822 | 0.02358  | 0.097366 | 0.5487897                    |                  |
| rs12444338 | 82,660,155                | cg08747377            | 82,660,670            | T/G     | T      | -0.1257 | 0.0775 | -0.2776 | 0.02625  | 0.104967 | 0.5659076                    |                  |
| rs12444338 | 82,660,155                | cg16777782            | 82,671,333            | T/G     | T      | 0.12447 | 0.078  | -0.0283 | 0.27726  | 0.110342 | 0.5701002                    |                  |
| rs12443878 | 82,659,933                | cg16777782            | 82,671,333            | A/C     | A      | 0.11501 | 0.0778 | -0.0375 | 0.26755  | 0.139483 | 0.5801549                    |                  |
| rs12443878 | 82,659,933                | cg08747377            | 82,660,670            | A/C     | A      | -0.1155 | 0.0768 | -0.2661 | 0.03508  | 0.132749 | 0.5801549                    |                  |
| rs62040565 | 82,660,946                | cg01880569            | 82,660,328            | C/T     | C      | 0.12202 | 0.078  | -0.0309 | 0.27497  | 0.117913 | 0.5801549                    |                  |
| rs62040565 | 82,660,946                | cg00423443            | 82,660,376            | C/T     | C      | 0.11891 | 0.0782 | -0.0343 | 0.27212  | 0.128235 | 0.5801549                    |                  |

|            |            |            |            |     |   |         |        |         |         |          |           |
|------------|------------|------------|------------|-----|---|---------|--------|---------|---------|----------|-----------|
| rs62040565 | 82,660,946 | cg02263260 | 82,658,496 | C/T | C | 0.11495 | 0.078  | -0.0379 | 0.26776 | 0.14036  | 0.5801549 |
| rs8060301  | 82,661,744 | cg09825093 | 82,660,505 | A/T | A | 0.11991 | 0.0782 | -0.0334 | 0.27317 | 0.125173 | 0.5801549 |
| rs12444338 | 82,660,155 | cg02495250 | 82,735,595 | T/G | T | 0.11177 | 0.0783 | -0.0417 | 0.2652  | 0.153359 | 0.6134344 |
| rs12443878 | 82,659,933 | cg00806490 | 82,660,873 | A/C | A | -0.1032 | 0.0779 | -0.256  | 0.04951 | 0.185277 | 0.6433374 |
| rs12443878 | 82,659,933 | cg02495250 | 82,735,595 | A/C | A | 0.09682 | 0.0784 | -0.0569 | 0.25054 | 0.217008 | 0.6433374 |
| rs12443878 | 82,659,933 | cg02263260 | 82,658,496 | A/C | A | 0.09474 | 0.0785 | -0.059  | 0.24851 | 0.227203 | 0.6433374 |
| rs12443878 | 82,659,933 | cg07301944 | 82,660,464 | A/C | A | 0.08456 | 0.0783 | -0.0689 | 0.23802 | 0.280163 | 0.6433374 |
| rs12444338 | 82,660,155 | cg02069674 | 82,660,317 | T/G | T | 0.10616 | 0.0783 | -0.0473 | 0.25959 | 0.175095 | 0.6433374 |
| rs12444338 | 82,660,155 | cg00806490 | 82,660,873 | T/G | T | -0.1072 | 0.0779 | -0.2598 | 0.04546 | 0.168752 | 0.6433374 |
| rs12444338 | 82,660,155 | cg06341397 | 82,640,290 | T/G | T | 0.09201 | 0.0781 | -0.0611 | 0.24513 | 0.238867 | 0.6433374 |
| rs12444338 | 82,660,155 | cg02168291 | 82,671,520 | T/G | T | -0.0872 | 0.0784 | -0.2409 | 0.06656 | 0.266394 | 0.6433374 |
| rs12444338 | 82,660,155 | cg08271366 | 82,816,457 | T/G | T | 0.08891 | 0.0778 | -0.0636 | 0.24138 | 0.253113 | 0.6433374 |
| rs12444338 | 82,660,155 | cg07301944 | 82,660,464 | T/G | T | 0.08685 | 0.0781 | -0.0662 | 0.23991 | 0.266076 | 0.6433374 |
| rs12444338 | 82,660,155 | cg01880569 | 82,660,328 | T/G | T | 0.08469 | 0.0784 | -0.0689 | 0.23831 | 0.279899 | 0.6433374 |
| rs62040565 | 82,660,946 | cg08497530 | 82,660,434 | C/T | C | -0.1009 | 0.0783 | -0.2543 | 0.05248 | 0.197234 | 0.6433374 |
| rs62040565 | 82,660,946 | cg09109133 | 82,688,759 | C/T | C | 0.10047 | 0.0783 | -0.053  | 0.25399 | 0.199555 | 0.6433374 |
| rs62040565 | 82,660,946 | cg08271366 | 82,816,457 | C/T | C | 0.09472 | 0.0779 | -0.058  | 0.24741 | 0.224084 | 0.6433374 |
| rs62040565 | 82,660,946 | cg00806490 | 82,660,873 | C/T | C | -0.0858 | 0.0785 | -0.2396 | 0.06794 | 0.273942 | 0.6433374 |
| rs8060301  | 82,661,744 | cg16777782 | 82,671,333 | A/T | A | 0.10493 | 0.0784 | -0.0487 | 0.25853 | 0.180565 | 0.6433374 |
| rs8060301  | 82,661,744 | cg08497530 | 82,660,434 | A/T | A | -0.0983 | 0.0784 | -0.2519 | 0.05532 | 0.209804 | 0.6433374 |
| rs8060301  | 82,661,744 | cg01090433 | 82,673,506 | A/T | A | -0.0972 | 0.0784 | -0.2509 | 0.05654 | 0.215321 | 0.6433374 |
| rs8060301  | 82,661,744 | cg16494747 | 82,660,206 | A/T | A | -0.0934 | 0.0783 | -0.2469 | 0.06    | 0.232638 | 0.6433374 |
| rs8060301  | 82,661,744 | cg02495250 | 82,735,595 | A/T | A | 0.09142 | 0.078  | -0.0614 | 0.24425 | 0.241005 | 0.6433374 |
| rs8060301  | 82,661,744 | cg26709234 | 82,868,296 | A/T | A | 0.08958 | 0.0784 | -0.0641 | 0.24327 | 0.253322 | 0.6433374 |
| rs8060301  | 82,661,744 | cg02263260 | 82,658,496 | A/T | A | 0.08891 | 0.0783 | -0.0645 | 0.24233 | 0.255979 | 0.6433374 |
| rs8060301  | 82,661,744 | cg07301944 | 82,660,464 | A/T | A | 0.08793 | 0.0776 | -0.0641 | 0.23996 | 0.256951 | 0.6433374 |
| rs12443878 | 82,659,933 | cg08497530 | 82,660,434 | A/C | A | -0.0824 | 0.0785 | -0.2363 | 0.07153 | 0.294069 | 0.6560091 |
| rs12443878 | 82,659,933 | cg02738205 | 82,741,062 | A/C | A | -0.079  | 0.0784 | -0.2328 | 0.07472 | 0.313699 | 0.6560091 |
| rs12444338 | 82,660,155 | cg02263260 | 82,658,496 | T/G | T | 0.07854 | 0.0786 | -0.0754 | 0.2325  | 0.317424 | 0.6560091 |
| rs62040565 | 82,660,946 | cg08747377 | 82,660,670 | C/T | C | -0.079  | 0.078  | -0.2319 | 0.07383 | 0.310965 | 0.6560091 |
| rs8060301  | 82,661,744 | cg08271366 | 82,816,457 | A/T | A | 0.07945 | 0.0785 | -0.0745 | 0.2334  | 0.311761 | 0.6560091 |

|            |            |            |            |     |   |         |        |         |         |          |           |
|------------|------------|------------|------------|-----|---|---------|--------|---------|---------|----------|-----------|
| rs8060301  | 82,661,744 | cg06341397 | 82,640,290 | A/T | A | 0.08035 | 0.0779 | -0.0723 | 0.23303 | 0.302319 | 0.6560091 |
| rs12443878 | 82,659,933 | cg00423443 | 82,660,376 | A/C | A | 0.06879 | 0.0786 | -0.0852 | 0.2228  | 0.381338 | 0.705648  |
| rs12443878 | 82,659,933 | cg16494747 | 82,660,206 | A/C | A | 0.06684 | 0.0785 | -0.0871 | 0.22076 | 0.394673 | 0.705648  |
| rs12443878 | 82,659,933 | cg06341397 | 82,640,290 | A/C | A | 0.06569 | 0.0785 | -0.0882 | 0.21957 | 0.40272  | 0.705648  |
| rs12444338 | 82,660,155 | cg05374412 | 82,660,727 | T/G | T | -0.0697 | 0.0786 | -0.2237 | 0.08428 | 0.374991 | 0.705648  |
| rs12444338 | 82,660,155 | cg09109133 | 82,688,759 | T/G | T | 0.06249 | 0.0783 | -0.091  | 0.216   | 0.424914 | 0.705648  |
| rs12444338 | 82,660,155 | cg05949171 | 82,660,596 | T/G | T | -0.0611 | 0.0784 | -0.2147 | 0.09247 | 0.435495 | 0.705648  |
| rs12444338 | 82,660,155 | cg07128660 | 82,474,489 | T/G | T | -0.0608 | 0.078  | -0.2136 | 0.09204 | 0.435649 | 0.705648  |
| rs62040565 | 82,660,946 | cg16777782 | 82,671,333 | C/T | C | 0.07077 | 0.0786 | -0.0833 | 0.22483 | 0.367916 | 0.705648  |
| rs62040565 | 82,660,946 | cg02168291 | 82,671,520 | C/T | C | -0.0666 | 0.0786 | -0.2207 | 0.08749 | 0.396817 | 0.705648  |
| rs62040565 | 82,660,946 | cg02755131 | 82,673,726 | C/T | C | 0.06579 | 0.0781 | -0.0872 | 0.21878 | 0.399335 | 0.705648  |
| rs62040565 | 82,660,946 | cg07128660 | 82,474,489 | C/T | C | 0.06274 | 0.0786 | -0.0914 | 0.21688 | 0.424973 | 0.705648  |
| rs62040565 | 82,660,946 | cg16494747 | 82,660,206 | C/T | C | 0.06268 | 0.0784 | -0.091  | 0.2164  | 0.424143 | 0.705648  |
| rs62040565 | 82,660,946 | cg02495250 | 82,735,595 | C/T | C | 0.06179 | 0.0786 | -0.0923 | 0.21594 | 0.432022 | 0.705648  |
| rs62040565 | 82,660,946 | cg05852523 | 82,659,960 | C/T | C | 0.06061 | 0.0782 | -0.0926 | 0.21384 | 0.438185 | 0.705648  |
| rs8060301  | 82,661,744 | cg08977371 | 82,660,490 | A/T | A | -0.0736 | 0.0785 | -0.2274 | 0.08025 | 0.348493 | 0.705648  |
| rs8060301  | 82,661,744 | cg08747377 | 82,660,670 | A/T | A | -0.0649 | 0.0782 | -0.2182 | 0.08842 | 0.406778 | 0.705648  |
| rs8060301  | 82,661,744 | cg01301138 | 82,660,630 | A/T | A | -0.0628 | 0.0786 | -0.2168 | 0.09128 | 0.424461 | 0.705648  |
| rs12444338 | 82,660,155 | cg08497530 | 82,660,434 | T/G | T | -0.0594 | 0.0786 | -0.2134 | 0.09459 | 0.449592 | 0.7147357 |
| rs12444338 | 82,660,155 | cg00423443 | 82,660,376 | T/G | T | 0.05596 | 0.0787 | -0.0982 | 0.21017 | 0.476904 | 0.7485589 |
| rs62040565 | 82,660,946 | cg02738205 | 82,741,062 | C/T | C | -0.0527 | 0.0787 | -0.207  | 0.10153 | 0.502957 | 0.7795827 |
| rs12443878 | 82,659,933 | cg05852523 | 82,659,960 | A/C | A | 0.04898 | 0.0785 | -0.1049 | 0.2029  | 0.532822 | 0.807578  |
| rs8060301  | 82,661,744 | cg02069674 | 82,660,317 | A/T | A | 0.04892 | 0.0787 | -0.1054 | 0.2032  | 0.534313 | 0.807578  |
| rs8060301  | 82,661,744 | cg19854301 | 82,671,450 | A/T | A | -0.0482 | 0.0787 | -0.2025 | 0.10611 | 0.540556 | 0.807578  |
| rs12443878 | 82,659,933 | cg09109133 | 82,688,759 | A/C | A | 0.04583 | 0.0786 | -0.1082 | 0.19986 | 0.559811 | 0.8263872 |
| rs12443878 | 82,659,933 | cg01090433 | 82,673,506 | A/C | A | -0.0448 | 0.0787 | -0.1991 | 0.10942 | 0.568909 | 0.8299378 |
| rs12444338 | 82,660,155 | cg08977371 | 82,660,490 | T/G | T | -0.0433 | 0.0786 | -0.1973 | 0.11072 | 0.58173  | 0.8387735 |
| rs12443878 | 82,659,933 | cg02168291 | 82,671,520 | A/C | A | -0.0403 | 0.0787 | -0.1947 | 0.11399 | 0.608369 | 0.8517527 |
| rs12443878 | 82,659,933 | cg05374412 | 82,660,727 | A/C | A | -0.04   | 0.0787 | -0.1943 | 0.11431 | 0.611339 | 0.8517527 |
| rs62040565 | 82,660,946 | cg05949171 | 82,660,596 | C/T | C | 0.04075 | 0.0782 | -0.1125 | 0.19399 | 0.602187 | 0.8517527 |
| rs12443878 | 82,659,933 | cg01301138 | 82,660,630 | A/C | A | -0.0388 | 0.0786 | -0.1929 | 0.1153  | 0.62154  | 0.8563441 |

|            |            |            |            |     |   |         |        |         |         |          |           |
|------------|------------|------------|------------|-----|---|---------|--------|---------|---------|----------|-----------|
| rs12443878 | 82,659,933 | cg19854301 | 82,671,450 | A/C | A | 0.03374 | 0.0788 | -0.1206 | 0.18811 | 0.668427 | 0.8640861 |
| rs12444338 | 82,660,155 | cg05852523 | 82,659,960 | T/G | T | -0.0355 | 0.0782 | -0.1888 | 0.11774 | 0.64959  | 0.8640861 |
| rs12444338 | 82,660,155 | cg01090433 | 82,673,506 | T/G | T | -0.034  | 0.0787 | -0.1883 | 0.12031 | 0.665723 | 0.8640861 |
| rs12444338 | 82,660,155 | cg01301138 | 82,660,630 | T/G | T | -0.0336 | 0.0787 | -0.1879 | 0.12059 | 0.668982 | 0.8640861 |
| rs12444338 | 82,660,155 | cg26709234 | 82,868,296 | T/G | T | 0.03293 | 0.0786 | -0.1211 | 0.18694 | 0.67514  | 0.8640861 |
| rs8060301  | 82,661,744 | cg04029645 | 82,665,755 | A/T | A | -0.0361 | 0.0787 | -0.1905 | 0.11821 | 0.646332 | 0.8640861 |
| rs8060301  | 82,661,744 | cg02755131 | 82,673,726 | A/T | A | -0.0329 | 0.0787 | -0.1871 | 0.12131 | 0.675938 | 0.8640861 |
| rs12443878 | 82,659,933 | cg07128660 | 82,474,489 | A/C | A | -0.0311 | 0.0785 | -0.1849 | 0.12277 | 0.69228  | 0.8759467 |
| rs8060301  | 82,661,744 | cg00806490 | 82,660,873 | A/T | A | -0.03   | 0.078  | -0.1828 | 0.12286 | 0.700736 | 0.87769   |
| rs12444338 | 82,660,155 | cg02738205 | 82,741,062 | T/G | T | 0.02553 | 0.0787 | -0.1287 | 0.1798  | 0.745664 | 0.8985533 |
| rs12444338 | 82,660,155 | cg02755131 | 82,673,726 | T/G | T | 0.02538 | 0.0785 | -0.1284 | 0.17922 | 0.746379 | 0.8985533 |
| rs62040565 | 82,660,946 | cg19854301 | 82,671,450 | C/T | C | 0.02665 | 0.0787 | -0.1277 | 0.18099 | 0.73507  | 0.8985533 |
| rs62040565 | 82,660,946 | cg01090433 | 82,673,506 | C/T | C | -0.0258 | 0.0788 | -0.1802 | 0.12859 | 0.743136 | 0.8985533 |
| rs12443878 | 82,659,933 | cg08977371 | 82,660,490 | A/C | A | -0.021  | 0.0785 | -0.1748 | 0.13279 | 0.788858 | 0.9154936 |
| rs12444338 | 82,660,155 | cg19854301 | 82,671,450 | T/G | T | -0.0215 | 0.0788 | -0.1759 | 0.13294 | 0.785316 | 0.9154936 |
| rs62040565 | 82,660,946 | cg05374412 | 82,660,727 | C/T | C | -0.0227 | 0.0788 | -0.1771 | 0.13166 | 0.772948 | 0.9154936 |
| rs62040565 | 82,660,946 | cg08977371 | 82,660,490 | C/T | C | 0.02096 | 0.0787 | -0.1333 | 0.17521 | 0.789982 | 0.9154936 |
| rs62040565 | 82,660,946 | cg26709234 | 82,868,296 | C/T | C | 0.01868 | 0.0787 | -0.1356 | 0.17298 | 0.812431 | 0.9327914 |
| rs12443878 | 82,659,933 | cg04029645 | 82,665,755 | A/C | A | 0.01554 | 0.0784 | -0.1381 | 0.16916 | 0.842837 | 0.9487525 |
| rs12443878 | 82,659,933 | cg26709234 | 82,868,296 | A/C | A | 0.01164 | 0.0784 | -0.142  | 0.16523 | 0.881944 | 0.9487525 |
| rs12444338 | 82,660,155 | cg16494747 | 82,660,206 | T/G | T | 0.0103  | 0.0788 | -0.1441 | 0.16472 | 0.896025 | 0.9487525 |
| rs62040565 | 82,660,946 | cg01301138 | 82,660,630 | C/T | C | -0.012  | 0.0785 | -0.1659 | 0.1419  | 0.878385 | 0.9487525 |
| rs62040565 | 82,660,946 | cg04029645 | 82,665,755 | C/T | C | -0.0118 | 0.0783 | -0.1654 | 0.14174 | 0.880126 | 0.9487525 |
| rs8060301  | 82,661,744 | cg09109133 | 82,688,759 | A/T | A | 0.01639 | 0.0787 | -0.1378 | 0.17059 | 0.834936 | 0.9487525 |
| rs8060301  | 82,661,744 | cg00423443 | 82,660,376 | A/T | A | 0.01016 | 0.0787 | -0.1441 | 0.16443 | 0.897315 | 0.9487525 |
| rs8060301  | 82,661,744 | cg01880569 | 82,660,328 | A/T | A | 0.0094  | 0.0786 | -0.1446 | 0.16343 | 0.904841 | 0.9487525 |
| rs8060301  | 82,661,744 | cg02738205 | 82,741,062 | A/T | A | -0.0095 | 0.0786 | -0.1636 | 0.14465 | 0.903861 | 0.9487525 |
| rs8060301  | 82,661,744 | cg05949171 | 82,660,596 | A/T | A | -0.0092 | 0.0787 | -0.1635 | 0.1451  | 0.907003 | 0.9487525 |
| rs8060301  | 82,661,744 | cg05852523 | 82,659,960 | A/T | A | -0.0088 | 0.0783 | -0.1623 | 0.1447  | 0.910496 | 0.9487525 |
| rs12443878 | 82,659,933 | cg05949171 | 82,660,596 | A/C | A | -0.0056 | 0.0782 | -0.159  | 0.14772 | 0.942538 | 0.9739559 |
| rs12444338 | 82,660,155 | cg04029645 | 82,665,755 | T/G | T | 0.00437 | 0.0787 | -0.1498 | 0.15853 | 0.955658 | 0.9793522 |

|            |            |            |            |     |   |         |        |         |         |          |           |
|------------|------------|------------|------------|-----|---|---------|--------|---------|---------|----------|-----------|
| rs12443878 | 82,659,933 | cg02755131 | 82,673,726 | A/C | A | 0.00216 | 0.0782 | -0.1511 | 0.15541 | 0.977934 | 0.9819966 |
| rs62040565 | 82,660,946 | cg06341397 | 82,640,290 | C/T | C | 0.00265 | 0.0786 | -0.1514 | 0.15673 | 0.973085 | 0.9819966 |
| rs8060301  | 82,661,744 | cg05374412 | 82,660,727 | A/T | A | -0.0018 | 0.0788 | -0.1561 | 0.15259 | 0.981997 | 0.9819966 |

<sup>a</sup> Genomic position on chromosome 16 (GRCh37/hg19)

<sup>b</sup> CpG-site code on Infinium HumanMethylation450 BeadChip

<sup>c</sup> Effects (tested allele effect on DNA methylation on transformed scale (Material and Methods)) and *P*-values are calculated using linear regression.

<sup>d</sup> The distribution of observed *P*-values was used to calculate the Benjamin-Hochberg false-discovery rate (FDR).  
SE, standard error; CI, confidence interval.

**Table S8.** Results of HYPEST-CADCZ meta-analysis for association tests between the DNA methylation level at targeted CDH13 promoter CpG sites/units and cardio-metabolic traits

| CpG site/unit <sup>a</sup> | Position at chr.16 <sup>b</sup> | Trait             | HYPEST    |          |           |           |                      |
|----------------------------|---------------------------------|-------------------|-----------|----------|-----------|-----------|----------------------|
|                            |                                 |                   | Beta      | SE       | CI_2.5%   | CI_97.5%  | P-value <sup>c</sup> |
| CpG_1                      | 82,660,317                      | SBP               | -0.409413 | 0.290489 | -0.978761 | 0.159935  | 0.162127             |
| CpG_1                      | 82,660,317                      | DBP               | -0.047645 | 0.184833 | -0.40991  | 0.314621  | 0.797165             |
| CpG_1                      | 82,660,317                      | Total cholesterol | 0.001368  | 0.014208 | -0.02648  | 0.029215  | 0.923429             |
| CpG_1                      | 82,660,317                      | HDL               | 0.003945  | 0.004493 | -0.00486  | 0.01275   | 0.381319             |
| CpG_1                      | 82,660,317                      | LDL               | -0.00378  | 0.01081  | -0.024967 | 0.017406  | 0.727041             |
| CpG_1                      | 82,660,317                      | Triglycerides     | 0.019272  | 0.013937 | -0.008044 | 0.046588  | 0.168831             |
| CpG_2                      | 82,660,328                      | SBP               | -0.666632 | 0.277628 | -1.210773 | -0.122491 | 0.018424             |
| CpG_2                      | 82,660,328                      | DBP               | -0.334633 | 0.177344 | -0.682222 | 0.012955  | 0.062432             |
| CpG_2                      | 82,660,328                      | Total cholesterol | 0.008025  | 0.014203 | -0.019812 | 0.035862  | 0.572915             |
| CpG_2                      | 82,660,328                      | HDL               | 0.000779  | 0.00451  | -0.00806  | 0.009617  | 0.863167             |
| CpG_2                      | 82,660,328                      | LDL               | -0.003234 | 0.010801 | -0.024402 | 0.017935  | 0.765056             |
| CpG_2                      | 82,660,328                      | Triglycerides     | 0.001183  | 0.014122 | -0.026496 | 0.028863  | 0.933333             |
| CpG_3                      | 82,660,376                      | SBP               | -0.01577  | 0.395999 | -0.791914 | 0.760374  | 0.968322             |
| CpG_3                      | 82,660,376                      | DBP               | 0.152466  | 0.249646 | -0.336831 | 0.641763  | 0.542919             |
| CpG_3                      | 82,660,376                      | Total cholesterol | -0.005109 | 0.018581 | -0.041526 | 0.031308  | 0.783747             |
| CpG_3                      | 82,660,376                      | HDL               | -0.003115 | 0.005889 | -0.014657 | 0.008427  | 0.59763              |
| CpG_3                      | 82,660,376                      | LDL               | -0.013207 | 0.014087 | -0.040817 | 0.014403  | 0.350028             |
| CpG_3                      | 82,660,376                      | Triglycerides     | -0.002068 | 0.018301 | -0.037937 | 0.033801  | 0.910189             |
| CpG_9                      | 82,660,464                      | SBP               | -0.256034 | 0.516289 | -1.267943 | 0.755874  | 0.621152             |
| CpG_9                      | 82,660,464                      | DBP               | 0.027498  | 0.325522 | -0.610514 | 0.66551   | 0.932865             |
| CpG_9                      | 82,660,464                      | Total cholesterol | 0.062576  | 0.025318 | 0.012953  | 0.112198  | 0.014578             |
| CpG_9                      | 82,660,464                      | HDL               | 0.007292  | 0.00816  | -0.0087   | 0.023285  | 0.372932             |
| CpG_9                      | 82,660,464                      | LDL               | 0.04993   | 0.019284 | 0.012133  | 0.087727  | 0.010575             |
| CpG_9                      | 82,660,464                      | Triglycerides     | 0.026084  | 0.025361 | -0.023623 | 0.075791  | 0.305392             |
| CpG_11                     | 82,660,490                      | SBP               | 0.064863  | 0.248467 | -0.422124 | 0.55185   | 0.794699             |
| CpG_11                     | 82,660,490                      | DBP               | 0.181621  | 0.155089 | -0.122349 | 0.48559   | 0.244921             |
| CpG_11                     | 82,660,490                      | Total cholesterol | 0.019152  | 0.013452 | -0.007215 | 0.045518  | 0.156769             |
| CpG_11                     | 82,660,490                      | HDL               | 0.002721  | 0.004319 | -0.005745 | 0.011187  | 0.529758             |



|           |                       |                   |           |          |           |          |          |
|-----------|-----------------------|-------------------|-----------|----------|-----------|----------|----------|
| CpG_11    | 82,660,490            | LDL               | 0.003605  | 0.010367 | -0.016715 | 0.023924 | 0.728586 |
| CpG_11    | 82,660,490            | Triglycerides     | -0.015005 | 0.013549 | -0.041561 | 0.011551 | 0.270002 |
| CpG_12    | 82,660,505            | SBP               | -0.314046 | 0.774733 | -1.832496 | 1.204404 | 0.686164 |
| CpG_12    | 82,660,505            | DBP               | -0.097326 | 0.488166 | -1.054114 | 0.859462 | 0.842418 |
| CpG_12    | 82,660,505            | Total cholesterol | 0.020246  | 0.03572  | -0.049764 | 0.090256 | 0.571702 |
| CpG_12    | 82,660,505            | HDL               | -0.010215 | 0.011368 | -0.032496 | 0.012065 | 0.370299 |
| CpG_12    | 82,660,505            | LDL               | 0.03586   | 0.027185 | -0.01742  | 0.089141 | 0.189132 |
| CpG_12    | 82,660,505            | Triglycerides     | -0.032437 | 0.035193 | -0.101414 | 0.036539 | 0.358171 |
| CpG_13    | 82,660,554            | SBP               | 0.78653   | 1.487392 | -2.128705 | 3.701765 | 0.598233 |
| CpG_13    | 82,660,554            | DBP               | 0.455762  | 0.936798 | -1.380329 | 2.291853 | 0.627775 |
| CpG_13    | 82,660,554            | Total cholesterol | 0.009189  | 0.075765 | -0.139307 | 0.157686 | 0.903628 |
| CpG_13    | 82,660,554            | HDL               | 0.031434  | 0.023859 | -0.015328 | 0.078196 | 0.189688 |
| CpG_13    | 82,660,554            | LDL               | -0.01827  | 0.057803 | -0.131561 | 0.095021 | 0.752388 |
| CpG_13    | 82,660,554            | Triglycerides     | 0.007631  | 0.074641 | -0.138662 | 0.153924 | 0.918706 |
| CpG_15    | 82,660,630            | SBP               | -0.648617 | 1.281787 | -3.160874 | 1.86364  | 0.614049 |
| CpG_15    | 82,660,630            | DBP               | -1.229007 | 0.815737 | -2.827821 | 0.369808 | 0.135334 |
| CpG_15    | 82,660,630            | Total cholesterol | 0.102997  | 0.077033 | -0.047985 | 0.253979 | 0.183272 |
| CpG_15    | 82,660,630            | HDL               | 0.017195  | 0.026124 | -0.034006 | 0.068397 | 0.511418 |
| CpG_15    | 82,660,630            | LDL               | 0.093191  | 0.058487 | -0.021441 | 0.207824 | 0.113226 |
| CpG_15    | 82,660,630            | Triglycerides     | -0.077664 | 0.077733 | -0.230018 | 0.07469  | 0.319404 |
| CpG_16-17 | 82,660,652-82,660,654 | SBP               | 0.676379  | 1.414151 | -2.095305 | 3.448064 | 0.633576 |
| CpG_16-17 | 82,660,652-82,660,654 | DBP               | 0.597217  | 0.908743 | -1.183887 | 2.37832  | 0.5127   |
| CpG_16-17 | 82,660,652-82,660,654 | Total cholesterol | 0.036757  | 0.066316 | -0.093219 | 0.166733 | 0.580229 |
| CpG_16-17 | 82,660,652-82,660,654 | HDL               | -0.002169 | 0.022409 | -0.04609  | 0.041752 | 0.923008 |
| CpG_16-17 | 82,660,652-82,660,654 | LDL               | -0.026591 | 0.050482 | -0.125534 | 0.072352 | 0.599163 |
| CpG_16-17 | 82,660,652-82,660,654 | Triglycerides     | 0.065576  | 0.066706 | -0.065165 | 0.196316 | 0.327215 |
| CpG_22    | 82,660,690            | SBP               | -0.053947 | 0.912504 | -1.842422 | 1.734528 | 0.952985 |
| CpG_22    | 82,660,690            | DBP               | -0.374057 | 0.585741 | -1.522089 | 0.773974 | 0.524667 |
| CpG_22    | 82,660,690            | Total cholesterol | 0.054329  | 0.051621 | -0.046847 | 0.155505 | 0.294318 |
| CpG_22    | 82,660,690            | HDL               | 0.025428  | 0.017365 | -0.008607 | 0.059464 | 0.145249 |
| CpG_22    | 82,660,690            | LDL               | 0.038156  | 0.039314 | -0.038898 | 0.11521  | 0.33337  |
| CpG_22    | 82,660,690            | Triglycerides     | -0.032681 | 0.051927 | -0.134457 | 0.069095 | 0.530105 |
| CpG_23    | 82,660,705            | SBP               | -2.138152 | 1.752134 | -5.572272 | 1.295968 | 0.225465 |

|           |                       |                   |           |          |           |           |          |
|-----------|-----------------------|-------------------|-----------|----------|-----------|-----------|----------|
| CpG_23    | 82,660,705            | DBP               | -1.78984  | 1.120831 | -3.986628 | 0.406949  | 0.11372  |
| CpG_23    | 82,660,705            | Total cholesterol | 0.060096  | 0.101062 | -0.137982 | 0.258173  | 0.552997 |
| CpG_23    | 82,660,705            | HDL               | 0.00803   | 0.03415  | -0.058904 | 0.074963  | 0.814435 |
| CpG_23    | 82,660,705            | LDL               | 0.009831  | 0.077013 | -0.141111 | 0.160773  | 0.898598 |
| CpG_23    | 82,660,705            | Triglycerides     | -0.012796 | 0.101364 | -0.211466 | 0.185873  | 0.899715 |
| CpG_27-29 | 82,660,761-82,660,767 | SBP               | -0.167132 | 1.066495 | -2.257424 | 1.92316   | 0.875823 |
| CpG_27-29 | 82,660,761-82,660,767 | DBP               | -0.275889 | 0.690554 | -1.629351 | 1.077572  | 0.690458 |
| CpG_27-29 | 82,660,761-82,660,767 | Total cholesterol | -0.032198 | 0.060339 | -0.15046  | 0.086064  | 0.594435 |
| CpG_27-29 | 82,660,761-82,660,767 | HDL               | -0.059473 | 0.019775 | -0.098231 | -0.020715 | 0.003116 |
| CpG_27-29 | 82,660,761-82,660,767 | LDL               | 0.032156  | 0.045887 | -0.05778  | 0.122092  | 0.484589 |
| CpG_27-29 | 82,660,761-82,660,767 | Triglycerides     | 0.045085  | 0.060219 | -0.072942 | 0.163113  | 0.4553   |
| CpG_30-31 | 82,660,774-82,660,779 | SBP               | 1.553888  | 4.175282 | -6.629514 | 9.73729   | 0.710627 |
| CpG_30-31 | 82,660,774-82,660,779 | DBP               | 1.889831  | 2.680808 | -3.364457 | 7.144118  | 0.482623 |
| CpG_30-31 | 82,660,774-82,660,779 | Total cholesterol | -0.124797 | 0.241504 | -0.598137 | 0.348543  | 0.606109 |
| CpG_30-31 | 82,660,774-82,660,779 | HDL               | -0.007604 | 0.081597 | -0.167532 | 0.152323  | 0.925875 |
| CpG_30-31 | 82,660,774-82,660,779 | LDL               | -0.221675 | 0.18308  | -0.580505 | 0.137156  | 0.227913 |
| CpG_30-31 | 82,660,774-82,660,779 | Triglycerides     | 0.692354  | 0.235449 | 0.230883  | 1.153826  | 0.003814 |
| CpG_32    | 82,660,791            | SBP               | -1.491522 | 0.912342 | -3.27968  | 0.296635  | 0.106064 |
| CpG_32    | 82,660,791            | DBP               | -0.343956 | 0.606234 | -1.532153 | 0.844241  | 0.572075 |
| CpG_32    | 82,660,791            | Total cholesterol | -0.022061 | 0.060895 | -0.141412 | 0.097291  | 0.71773  |
| CpG_32    | 82,660,791            | HDL               | 0.037846  | 0.017938 | 0.002688  | 0.073005  | 0.036779 |
| CpG_32    | 82,660,791            | LDL               | -0.04527  | 0.045294 | -0.134043 | 0.043504  | 0.319411 |
| CpG_32    | 82,660,791            | Triglycerides     | -0.038511 | 0.06032  | -0.156735 | 0.079713  | 0.524313 |
| CpG_36    | 82,660,826            | SBP               | 0.003047  | 0.703881 | -1.376534 | 1.382629  | 0.996556 |
| CpG_36    | 82,660,826            | DBP               | -0.080303 | 0.454064 | -0.970253 | 0.809647  | 0.860065 |
| CpG_36    | 82,660,826            | Total cholesterol | 0.01809   | 0.046517 | -0.073081 | 0.109261  | 0.697976 |
| CpG_36    | 82,660,826            | HDL               | 0.00359   | 0.01379  | -0.023438 | 0.030618  | 0.795015 |
| CpG_36    | 82,660,826            | LDL               | 0.035555  | 0.03492  | -0.032887 | 0.103997  | 0.310428 |
| CpG_36    | 82,660,826            | Triglycerides     | 0.001542  | 0.045913 | -0.088446 | 0.09153   | 0.97326  |
| CpG_37    | 82,660,834            | SBP               | -3.152186 | 3.557163 | -10.1241  | 3.819725  | 0.377846 |
| CpG_37    | 82,660,834            | DBP               | -1.873476 | 2.289803 | -6.361407 | 2.614455  | 0.415367 |
| CpG_37    | 82,660,834            | Total cholesterol | 0.067677  | 0.178099 | -0.281391 | 0.416745  | 0.704498 |
| CpG_37    | 82,660,834            | HDL               | -0.073289 | 0.059847 | -0.190586 | 0.044009  | 0.222682 |

|           |                       |                   |           |          |           |          |          |
|-----------|-----------------------|-------------------|-----------|----------|-----------|----------|----------|
| CpG_37    | 82,660,834            | LDL               | -0.069966 | 0.135506 | -0.335553 | 0.195621 | 0.606398 |
| CpG_37    | 82,660,834            | Triglycerides     | 0.129214  | 0.179199 | -0.222009 | 0.480438 | 0.472029 |
| CpG_38    | 82,660,843            | SBP               | -0.153907 | 0.598221 | -1.326399 | 1.018585 | 0.797581 |
| CpG_38    | 82,660,843            | DBP               | 0.06865   | 0.385968 | -0.687833 | 0.825132 | 0.859248 |
| CpG_38    | 82,660,843            | Total cholesterol | -0.014635 | 0.034271 | -0.081806 | 0.052536 | 0.670007 |
| CpG_38    | 82,660,843            | HDL               | 0.011951  | 0.011708 | -0.010997 | 0.034899 | 0.309123 |
| CpG_38    | 82,660,843            | LDL               | -0.013536 | 0.025906 | -0.064311 | 0.037238 | 0.602127 |
| CpG_38    | 82,660,843            | Triglycerides     | -0.046883 | 0.034495 | -0.114491 | 0.020726 | 0.176308 |
| CpG_39-42 | 82,660,847-82,660,855 | SBP               | -1.468101 | 1.099573 | -3.623224 | 0.687023 | 0.185156 |
| CpG_39-42 | 82,660,847-82,660,855 | DBP               | -0.720146 | 0.710728 | -2.113148 | 0.672855 | 0.313627 |
| CpG_39-42 | 82,660,847-82,660,855 | Total cholesterol | 0.055692  | 0.059624 | -0.061169 | 0.172552 | 0.35184  |
| CpG_39-42 | 82,660,847-82,660,855 | HDL               | 0.026395  | 0.01996  | -0.012726 | 0.065515 | 0.188139 |
| CpG_39-42 | 82,660,847-82,660,855 | LDL               | 0.008662  | 0.045473 | -0.080463 | 0.097788 | 0.849191 |
| CpG_39-42 | 82,660,847-82,660,855 | Triglycerides     | -0.005455 | 0.059884 | -0.122826 | 0.111916 | 0.927548 |
| CpG_43    | 82,660,866            | SBP               | 0.249827  | 0.566202 | -0.859908 | 1.359562 | 0.660079 |
| CpG_43    | 82,660,866            | DBP               | -0.210245 | 0.363971 | -0.923616 | 0.503125 | 0.564917 |
| CpG_43    | 82,660,866            | Total cholesterol | -0.011318 | 0.021347 | -0.053157 | 0.030522 | 0.596794 |
| CpG_43    | 82,660,866            | HDL               | 0.001736  | 0.007212 | -0.012398 | 0.015871 | 0.810061 |
| CpG_43    | 82,660,866            | LDL               | -0.007308 | 0.016253 | -0.039163 | 0.024547 | 0.653621 |
| CpG_43    | 82,660,866            | Triglycerides     | -0.017513 | 0.021339 | -0.059338 | 0.024311 | 0.413158 |
| CpG_45    | 82,660,890            | SBP               | 0.702245  | 0.44767  | -0.175172 | 1.579662 | 0.120159 |
| CpG_45    | 82,660,890            | DBP               | 0.076151  | 0.29171  | -0.495591 | 0.647893 | 0.794637 |
| CpG_45    | 82,660,890            | Total cholesterol | -0.018929 | 0.024327 | -0.06661  | 0.028752 | 0.437766 |
| CpG_45    | 82,660,890            | HDL               | 0.004832  | 0.00822  | -0.011278 | 0.020942 | 0.557556 |
| CpG_45    | 82,660,890            | LDL               | 0.013062  | 0.018524 | -0.023244 | 0.049368 | 0.481845 |
| CpG_45    | 82,660,890            | Triglycerides     | -0.019777 | 0.024679 | -0.068146 | 0.028592 | 0.424227 |
| CpG_52    | 82,661,050            | SBP               | 0.736498  | 0.586593 | -0.413203 | 1.886199 | 0.212801 |
| CpG_52    | 82,661,050            | DBP               | 0.682355  | 0.424364 | -0.149383 | 1.514093 | 0.111644 |
| CpG_52    | 82,661,050            | Total cholesterol | 0.029957  | 0.030275 | -0.029381 | 0.089296 | 0.32418  |
| CpG_52    | 82,661,050            | HDL               | 0.008423  | 0.011661 | -0.014433 | 0.031278 | 0.471365 |
| CpG_52    | 82,661,050            | LDL               | 0.022312  | 0.026355 | -0.029342 | 0.073966 | 0.398708 |
| CpG_52    | 82,661,050            | Triglycerides     | -0.007839 | 0.024519 | -0.055896 | 0.040217 | 0.749672 |
| CpG_53    | 82,661,087            | SBP               | 0.817954  | 0.718592 | -0.590461 | 2.226369 | 0.260656 |

|           |                       |                   |           |          |           |           |          |
|-----------|-----------------------|-------------------|-----------|----------|-----------|-----------|----------|
| CpG_53    | 82,661,087            | DBP               | 0.588908  | 0.508921 | -0.408559 | 1.586374  | 0.252929 |
| CpG_53    | 82,661,087            | Total cholesterol | 0.003506  | 0.029986 | -0.055267 | 0.062278  | 0.907258 |
| CpG_53    | 82,661,087            | HDL               | -0.022098 | 0.011408 | -0.044456 | 0.000261  | 0.056609 |
| CpG_53    | 82,661,087            | LDL               | 0.00406   | 0.026176 | -0.047243 | 0.055364  | 0.877155 |
| CpG_53    | 82,661,087            | Triglycerides     | 0.043707  | 0.022802 | -0.000984 | 0.088399  | 0.059179 |
| CpG_54    | 82,661,095            | SBP               | 0.312273  | 0.480914 | -0.6303   | 1.254847  | 0.517916 |
| CpG_54    | 82,661,095            | DBP               | -0.183379 | 0.350291 | -0.869936 | 0.503179  | 0.602019 |
| CpG_54    | 82,661,095            | Total cholesterol | 0.003811  | 0.025134 | -0.045452 | 0.053073  | 0.879724 |
| CpG_54    | 82,661,095            | HDL               | -0.009866 | 0.009675 | -0.028829 | 0.009098  | 0.309722 |
| CpG_54    | 82,661,095            | LDL               | -0.001808 | 0.021803 | -0.04454  | 0.040925  | 0.93405  |
| CpG_54    | 82,661,095            | Triglycerides     | 0.008401  | 0.020178 | -0.031148 | 0.047949  | 0.677846 |
| CpG_57-58 | 82,661,139-82,661,141 | SBP               | 0.093404  | 0.284919 | -0.465028 | 0.651836  | 0.74389  |
| CpG_57-58 | 82,661,139-82,661,141 | DBP               | 0.241416  | 0.204063 | -0.15854  | 0.641373  | 0.240251 |
| CpG_57-58 | 82,661,139-82,661,141 | Total cholesterol | 0.007132  | 0.015538 | -0.023321 | 0.037585  | 0.646993 |
| CpG_57-58 | 82,661,139-82,661,141 | HDL               | -0.001162 | 0.005581 | -0.0121   | 0.009775  | 0.835328 |
| CpG_57-58 | 82,661,139-82,661,141 | LDL               | 0.00581   | 0.013514 | -0.020677 | 0.032297  | 0.667961 |
| CpG_57-58 | 82,661,139-82,661,141 | Triglycerides     | 0.004972  | 0.012156 | -0.018854 | 0.028798  | 0.683243 |
| CpG_62-64 | 82,661,175-82,661,188 | SBP               | -1.048639 | 0.51651  | -2.060981 | -0.036297 | 0.045927 |
| CpG_62-64 | 82,661,175-82,661,188 | DBP               | -0.953686 | 0.360908 | -1.661053 | -0.246319 | 0.010039 |
| CpG_62-64 | 82,661,175-82,661,188 | Total cholesterol | -0.024401 | 0.024019 | -0.071477 | 0.022676  | 0.31173  |
| CpG_62-64 | 82,661,175-82,661,188 | HDL               | 0.006209  | 0.008589 | -0.010625 | 0.023043  | 0.471156 |
| CpG_62-64 | 82,661,175-82,661,188 | LDL               | -0.032607 | 0.020955 | -0.073677 | 0.008463  | 0.122324 |
| CpG_62-64 | 82,661,175-82,661,188 | Triglycerides     | 0.002153  | 0.018935 | -0.034959 | 0.039264  | 0.909681 |
| CpG_66    | 82,661,202            | SBP               | -0.473685 | 0.469462 | -1.393814 | 0.446444  | 0.31591  |
| CpG_66    | 82,661,202            | DBP               | -0.353677 | 0.341537 | -1.023077 | 0.315723  | 0.303422 |
| CpG_66    | 82,661,202            | Total cholesterol | 0.003469  | 0.02598  | -0.047451 | 0.054389  | 0.893978 |
| CpG_66    | 82,661,202            | HDL               | -0.005483 | 0.009959 | -0.025003 | 0.014037  | 0.582857 |
| CpG_66    | 82,661,202            | LDL               | 0.003757  | 0.022612 | -0.040562 | 0.048075  | 0.868302 |
| CpG_66    | 82,661,202            | Triglycerides     | 0.012794  | 0.020924 | -0.028216 | 0.053805  | 0.541929 |
| CpG_67    | 82,661,217            | SBP               | -0.851558 | 1.191733 | -3.187311 | 1.484195  | 0.476914 |
| CpG_67    | 82,661,217            | DBP               | -0.897245 | 0.868018 | -2.598528 | 0.804039  | 0.304329 |
| CpG_67    | 82,661,217            | Total cholesterol | -0.105661 | 0.063595 | -0.230306 | 0.018983  | 0.098941 |
| CpG_67    | 82,661,217            | HDL               | 0.004387  | 0.024435 | -0.043504 | 0.052278  | 0.857785 |

|           |                       |                   |           |          |           |           |          |
|-----------|-----------------------|-------------------|-----------|----------|-----------|-----------|----------|
| CpG_67    | 82,661,217            | LDL               | -0.121451 | 0.054856 | -0.228966 | -0.013935 | 0.028507 |
| CpG_67    | 82,661,217            | Triglycerides     | -0.03141  | 0.051746 | -0.132829 | 0.07001   | 0.544876 |
| CpG_69-70 | 82,661,244-82,661,248 | SBP               | -0.960038 | 0.870306 | -2.665806 | 0.745731  | 0.273331 |
| CpG_69-70 | 82,661,244-82,661,248 | DBP               | -0.507182 | 0.610307 | -1.703362 | 0.688997  | 0.408462 |
| CpG_69-70 | 82,661,244-82,661,248 | Total cholesterol | -0.088813 | 0.0454   | -0.177795 | 0.000168  | 0.052579 |
| CpG_69-70 | 82,661,244-82,661,248 | HDL               | -0.00707  | 0.015773 | -0.037985 | 0.023844  | 0.654707 |
| CpG_69-70 | 82,661,244-82,661,248 | LDL               | -0.092348 | 0.038824 | -0.168442 | -0.016254 | 0.018832 |
| CpG_69-70 | 82,661,244-82,661,248 | Triglycerides     | -0.023973 | 0.036578 | -0.095665 | 0.04772   | 0.51339  |
| CpG_71-72 | 82,661,267-82,661,275 | SBP               | -0.207865 | 0.844873 | -1.863787 | 1.448056  | 0.806288 |
| CpG_71-72 | 82,661,267-82,661,275 | DBP               | -0.128396 | 0.6132   | -1.330245 | 1.073453  | 0.834678 |
| CpG_71-72 | 82,661,267-82,661,275 | Total cholesterol | -0.076275 | 0.04168  | -0.157966 | 0.005416  | 0.069521 |
| CpG_71-72 | 82,661,267-82,661,275 | HDL               | 0.021892  | 0.016034 | -0.009534 | 0.053317  | 0.174486 |
| CpG_71-72 | 82,661,267-82,661,275 | LDL               | -0.08362  | 0.035925 | -0.154031 | -0.013209 | 0.021463 |
| CpG_71-72 | 82,661,267-82,661,275 | Triglycerides     | -0.034363 | 0.033943 | -0.100891 | 0.032165  | 0.313241 |
| CpG_73-74 | 82,661,285-82,661,290 | SBP               | -4.175494 | 1.622271 | -7.355087 | -0.995901 | 0.011879 |
| CpG_73-74 | 82,661,285-82,661,290 | DBP               | -2.792638 | 1.181531 | -5.108397 | -0.476879 | 0.020495 |
| CpG_73-74 | 82,661,285-82,661,290 | Total cholesterol | -0.032156 | 0.072105 | -0.173479 | 0.109167  | 0.656354 |
| CpG_73-74 | 82,661,285-82,661,290 | HDL               | 0.02323   | 0.024941 | -0.025654 | 0.072114  | 0.353346 |
| CpG_73-74 | 82,661,285-82,661,290 | LDL               | -0.040242 | 0.061604 | -0.160984 | 0.0805    | 0.514741 |
| CpG_73-74 | 82,661,285-82,661,290 | Triglycerides     | 0.003369  | 0.057619 | -0.109562 | 0.116301  | 0.953457 |
| CpG_75-76 | 82,661,313-82,661,326 | SBP               | -1.051914 | 1.020897 | -3.052836 | 0.949008  | 0.306142 |
| CpG_75-76 | 82,661,313-82,661,326 | DBP               | -0.219325 | 0.744263 | -1.678053 | 1.239403  | 0.769047 |
| CpG_75-76 | 82,661,313-82,661,326 | Total cholesterol | -0.032326 | 0.04564  | -0.121779 | 0.057128  | 0.480086 |
| CpG_75-76 | 82,661,313-82,661,326 | HDL               | 0.028735  | 0.016055 | -0.002732 | 0.060202  | 0.075889 |
| CpG_75-76 | 82,661,313-82,661,326 | LDL               | -0.067953 | 0.039421 | -0.145217 | 0.009311  | 0.0872   |
| CpG_75-76 | 82,661,313-82,661,326 | Triglycerides     | -0.002108 | 0.036271 | -0.073197 | 0.068981  | 0.953747 |
| CpG_77-81 | 82,661,336-82,661,349 | SBP               | -0.540071 | 0.741984 | -1.994334 | 0.914191  | 0.468816 |
| CpG_77-81 | 82,661,336-82,661,349 | DBP               | -0.388717 | 0.52739  | -1.422383 | 0.644949  | 0.463244 |
| CpG_77-81 | 82,661,336-82,661,349 | Total cholesterol | -0.093802 | 0.045073 | -0.182144 | -0.00546  | 0.039343 |
| CpG_77-81 | 82,661,336-82,661,349 | HDL               | -0.01472  | 0.01753  | -0.049079 | 0.019638  | 0.402577 |
| CpG_77-81 | 82,661,336-82,661,349 | LDL               | -0.073995 | 0.039244 | -0.150912 | 0.002922  | 0.061542 |
| CpG_77-81 | 82,661,336-82,661,349 | Triglycerides     | -0.028113 | 0.036942 | -0.100518 | 0.044292  | 0.448012 |
| CpG_83    | 82,661,360            | SBP               | -0.060796 | 0.340415 | -0.727997 | 0.606406  | 0.858709 |

|           |                       |                   |           |          |           |          |          |
|-----------|-----------------------|-------------------|-----------|----------|-----------|----------|----------|
| CpG_83    | 82,661,360            | DBP               | -0.316178 | 0.243201 | -0.792842 | 0.160487 | 0.19731  |
| CpG_83    | 82,661,360            | Total cholesterol | -0.013828 | 0.013239 | -0.039776 | 0.01212  | 0.298156 |
| CpG_83    | 82,661,360            | HDL               | 0.006107  | 0.004588 | -0.002886 | 0.0151   | 0.185468 |
| CpG_83    | 82,661,360            | LDL               | -0.015899 | 0.011285 | -0.038018 | 0.00622  | 0.161241 |
| CpG_83    | 82,661,360            | Triglycerides     | -0.019406 | 0.010527 | -0.040039 | 0.001227 | 0.067523 |
| CpG_84-85 | 82,661,384-82,661,390 | SBP               | -0.017177 | 0.289267 | -0.58413  | 0.549777 | 0.952799 |
| CpG_84-85 | 82,661,384-82,661,390 | DBP               | 0.111195  | 0.208933 | -0.298306 | 0.520696 | 0.596078 |
| CpG_84-85 | 82,661,384-82,661,390 | Total cholesterol | -0.002247 | 0.015216 | -0.032069 | 0.027576 | 0.882855 |
| CpG_84-85 | 82,661,384-82,661,390 | HDL               | 0.000691  | 0.005835 | -0.010745 | 0.012126 | 0.905919 |
| CpG_84-85 | 82,661,384-82,661,390 | LDL               | 0.002236  | 0.013204 | -0.023643 | 0.028116 | 0.865773 |
| CpG_84-85 | 82,661,384-82,661,390 | Triglycerides     | -0.001697 | 0.012147 | -0.025504 | 0.022109 | 0.889077 |
| CpG_86    | 82,661,399            | SBP               | -0.062355 | 0.125583 | -0.308493 | 0.183782 | 0.62085  |
| CpG_86    | 82,661,399            | DBP               | -0.056515 | 0.091753 | -0.236348 | 0.123319 | 0.539638 |
| CpG_86    | 82,661,399            | Total cholesterol | -0.003928 | 0.007677 | -0.018975 | 0.011119 | 0.609756 |
| CpG_86    | 82,661,399            | HDL               | 0.000879  | 0.002953 | -0.004909 | 0.006667 | 0.76643  |
| CpG_86    | 82,661,399            | LDL               | -0.004078 | 0.006642 | -0.017096 | 0.00894  | 0.540282 |
| CpG_86    | 82,661,399            | Triglycerides     | -0.006732 | 0.006161 | -0.018808 | 0.005343 | 0.276501 |
| CpG_87-88 | 82,661,404-82,661,413 | SBP               | -0.185451 | 0.350062 | -0.871559 | 0.500657 | 0.597722 |
| CpG_87-88 | 82,661,404-82,661,413 | DBP               | 0.059474  | 0.254515 | -0.439366 | 0.558315 | 0.815825 |
| CpG_87-88 | 82,661,404-82,661,413 | Total cholesterol | 0.026463  | 0.019212 | -0.011191 | 0.064118 | 0.170704 |
| CpG_87-88 | 82,661,404-82,661,413 | HDL               | 0.002005  | 0.007471 | -0.012637 | 0.016648 | 0.788788 |
| CpG_87-88 | 82,661,404-82,661,413 | LDL               | 0.01892   | 0.01664  | -0.013695 | 0.051534 | 0.257605 |
| CpG_87-88 | 82,661,404-82,661,413 | Triglycerides     | 0.003338  | 0.015643 | -0.027322 | 0.033998 | 0.831371 |
| CpG_89    | 82,661,421            | SBP               | -0.704706 | 0.723908 | -2.123541 | 0.714128 | 0.333926 |
| CpG_89    | 82,661,421            | DBP               | -0.488188 | 0.504813 | -1.477603 | 0.501227 | 0.337095 |
| CpG_89    | 82,661,421            | Total cholesterol | -0.034302 | 0.038402 | -0.109569 | 0.040965 | 0.373736 |
| CpG_89    | 82,661,421            | HDL               | -0.015403 | 0.014461 | -0.043746 | 0.012941 | 0.289236 |
| CpG_89    | 82,661,421            | LDL               | -0.011605 | 0.033955 | -0.078156 | 0.054946 | 0.733191 |
| CpG_89    | 82,661,421            | Triglycerides     | -0.030432 | 0.030181 | -0.089586 | 0.028722 | 0.315576 |
| CpG_90    | 82,661,438            | SBP               | -0.2733   | 0.572219 | -1.394829 | 0.848229 | 0.63418  |
| CpG_90    | 82,661,438            | DBP               | -0.382342 | 0.414882 | -1.195496 | 0.430812 | 0.359425 |
| CpG_90    | 82,661,438            | Total cholesterol | 0.008889  | 0.027994 | -0.045979 | 0.063756 | 0.751338 |
| CpG_90    | 82,661,438            | HDL               | -0.001597 | 0.010768 | -0.022702 | 0.019507 | 0.882284 |

|         |            |                   |           |          |           |          |          |
|---------|------------|-------------------|-----------|----------|-----------|----------|----------|
| CpG_90  | 82,661,438 | LDL               | 0.000657  | 0.024355 | -0.047077 | 0.048391 | 0.978523 |
| CpG_90  | 82,661,438 | Triglycerides     | 0.000508  | 0.022657 | -0.043899 | 0.044915 | 0.982139 |
| CpG_91  | 82,661,469 | SBP               | 0.094573  | 0.323877 | -0.540215 | 0.729361 | 0.771627 |
| CpG_91  | 82,661,469 | DBP               | 0.11018   | 0.240197 | -0.360597 | 0.580957 | 0.648652 |
| CpG_91  | 82,661,469 | Total cholesterol | -0.008272 | 0.020724 | -0.048889 | 0.032346 | 0.690841 |
| CpG_91  | 82,661,469 | HDL               | -0.001634 | 0.006507 | -0.014387 | 0.01112  | 0.802375 |
| CpG_91  | 82,661,469 | LDL               | 0.002395  | 0.016105 | -0.029169 | 0.03396  | 0.882136 |
| CpG_91  | 82,661,469 | Triglycerides     | -0.005855 | 0.012997 | -0.031329 | 0.019618 | 0.653556 |
| CpG_92  | 82,661,480 | SBP               | 0.282549  | 2.263617 | -4.15406  | 4.719157 | 0.901221 |
| CpG_92  | 82,661,480 | DBP               | 1.618252  | 1.663988 | -1.643104 | 4.879608 | 0.335994 |
| CpG_92  | 82,661,480 | Total cholesterol | -0.017719 | 0.100845 | -0.215371 | 0.179933 | 0.860962 |
| CpG_92  | 82,661,480 | HDL               | 0.058378  | 0.030979 | -0.00234  | 0.119096 | 0.063096 |
| CpG_92  | 82,661,480 | LDL               | -0.005757 | 0.078314 | -0.159249 | 0.147735 | 0.941583 |
| CpG_92  | 82,661,480 | Triglycerides     | -0.108212 | 0.062085 | -0.229897 | 0.013473 | 0.085184 |
| CpG_104 | 82,661,633 | SBP               | -0.249434 | 0.453464 | -1.138207 | 0.639338 | 0.585057 |
| CpG_104 | 82,661,633 | DBP               | 0.287621  | 0.335908 | -0.370746 | 0.945988 | 0.396499 |
| CpG_104 | 82,661,633 | Total cholesterol | -0.025405 | 0.025266 | -0.074926 | 0.024116 | 0.317772 |
| CpG_104 | 82,661,633 | HDL               | 0.005111  | 0.007873 | -0.010319 | 0.020541 | 0.518106 |
| CpG_104 | 82,661,633 | LDL               | -0.015264 | 0.019523 | -0.053528 | 0.022999 | 0.436656 |
| CpG_104 | 82,661,633 | Triglycerides     | 0.004567  | 0.015806 | -0.026412 | 0.035546 | 0.773423 |
| CpG_106 | 82,661,670 | SBP               | 0.712323  | 0.587745 | -0.439636 | 1.864282 | 0.231854 |
| CpG_106 | 82,661,670 | DBP               | 0.06633   | 0.44345  | -0.802815 | 0.935475 | 0.881766 |
| CpG_106 | 82,661,670 | Total cholesterol | 0.008265  | 0.032297 | -0.055036 | 0.071565 | 0.798679 |
| CpG_106 | 82,661,670 | HDL               | -0.009068 | 0.010089 | -0.028842 | 0.010705 | 0.371388 |
| CpG_106 | 82,661,670 | LDL               | 0.011381  | 0.025055 | -0.037726 | 0.060488 | 0.650878 |
| CpG_106 | 82,661,670 | Triglycerides     | 0.044855  | 0.019644 | 0.006353  | 0.083356 | 0.02506  |
| CpG_107 | 82,661,696 | SBP               | -0.848701 | 1.000678 | -2.809993 | 1.112591 | 0.400958 |
| CpG_107 | 82,661,696 | DBP               | -0.332682 | 0.747135 | -1.79704  | 1.131675 | 0.658303 |
| CpG_107 | 82,661,696 | Total cholesterol | 0.059201  | 0.054635 | -0.047881 | 0.166283 | 0.281851 |
| CpG_107 | 82,661,696 | HDL               | 0.017141  | 0.01765  | -0.017452 | 0.051734 | 0.334424 |
| CpG_107 | 82,661,696 | LDL               | 0.022056  | 0.042587 | -0.061414 | 0.105525 | 0.605983 |
| CpG_107 | 82,661,696 | Triglycerides     | 0.036652  | 0.035213 | -0.032364 | 0.105667 | 0.301154 |
| CpG_108 | 82,661,701 | SBP               | 0.119477  | 0.238416 | -0.34781  | 0.586764 | 0.619332 |

|         |            |                   |           |          |           |          |          |
|---------|------------|-------------------|-----------|----------|-----------|----------|----------|
| CpG_108 | 82,661,701 | DBP               | 0.006257  | 0.180605 | -0.347723 | 0.360237 | 0.972555 |
| CpG_108 | 82,661,701 | Total cholesterol | 0.010222  | 0.011179 | -0.012886 | 0.033331 | 0.388851 |
| CpG_108 | 82,661,701 | HDL               | -0.000398 | 0.003748 | -0.007744 | 0.006947 | 0.915642 |
| CpG_108 | 82,661,701 | LDL               | 0.012468  | 0.008766 | -0.004713 | 0.029648 | 0.159305 |
| CpG_108 | 82,661,701 | Triglycerides     | 0.004377  | 0.007548 | -0.010417 | 0.019171 | 0.563866 |
| CpG_109 | 82,661,725 | SBP               | -1.78144  | 1.502681 | -4.726641 | 1.163762 | 0.24204  |
| CpG_109 | 82,661,725 | DBP               | -2.103862 | 1.089009 | -4.238281 | 0.030556 | 0.059682 |
| CpG_109 | 82,661,725 | Total cholesterol | -0.067222 | 0.078156 | -0.220404 | 0.08596  | 0.392271 |
| CpG_109 | 82,661,725 | HDL               | 0.008555  | 0.024619 | -0.039697 | 0.056807 | 0.72911  |
| CpG_109 | 82,661,725 | LDL               | -0.05939  | 0.060603 | -0.178169 | 0.059389 | 0.330011 |
| CpG_109 | 82,661,725 | Triglycerides     | 0.016028  | 0.04923  | -0.080461 | 0.112517 | 0.745599 |
| CpG_116 | 82,661,812 | SBP               | 0.021732  | 0.287048 | -0.540871 | 0.584335 | 0.939986 |
| CpG_116 | 82,661,812 | DBP               | -0.070342 | 0.212934 | -0.487685 | 0.347    | 0.74267  |
| CpG_116 | 82,661,812 | Total cholesterol | 0.017678  | 0.015801 | -0.013292 | 0.048648 | 0.266544 |
| CpG_116 | 82,661,812 | HDL               | 0.005298  | 0.004962 | -0.004428 | 0.015023 | 0.288851 |
| CpG_116 | 82,661,812 | LDL               | 0.026089  | 0.012019 | 0.002533  | 0.049646 | 0.032881 |
| CpG_116 | 82,661,812 | Triglycerides     | -0.005521 | 0.010029 | -0.025178 | 0.014135 | 0.583494 |



CADCZ

| CpG site/unit <sup>a</sup> | Position at chr.16 <sup>b</sup> | Trait             | Beta      | SE       | CI_2.5%   | CI_97.5%  | P-value  |
|----------------------------|---------------------------------|-------------------|-----------|----------|-----------|-----------|----------|
| CpG_1                      | 82,660,317                      | SBP               | -0.263373 | 0.189379 | -0.634549 | 0.107804  | 0.166358 |
| CpG_1                      | 82,660,317                      | DBP               | -0.129149 | 0.117327 | -0.359107 | 0.100808  | 0.272753 |
| CpG_1                      | 82,660,317                      | Total cholesterol | -0.008137 | 0.011432 | -0.030545 | 0.01427   | 0.477696 |
| CpG_1                      | 82,660,317                      | HDL               | 0.00661   | 0.003477 | -0.000205 | 0.013424  | 0.059202 |
| CpG_1                      | 82,660,317                      | LDL               | -0.014327 | 0.01038  | -0.034672 | 0.006018  | 0.169558 |
| CpG_1                      | 82,660,317                      | Triglycerides     | -0.009352 | 0.013022 | -0.034875 | 0.01617   | 0.47374  |
| CpG_2                      | 82,660,328                      | SBP               | -0.268157 | 0.193206 | -0.646834 | 0.110519  | 0.167201 |
| CpG_2                      | 82,660,328                      | DBP               | -0.065091 | 0.120058 | -0.300399 | 0.170218  | 0.588505 |
| CpG_2                      | 82,660,328                      | Total cholesterol | 0.002863  | 0.011766 | -0.020197 | 0.025923  | 0.808063 |
| CpG_2                      | 82,660,328                      | HDL               | 0.001278  | 0.003614 | -0.005805 | 0.008361  | 0.724021 |
| CpG_2                      | 82,660,328                      | LDL               | -0.002868 | 0.010758 | -0.023954 | 0.018218  | 0.790157 |
| CpG_2                      | 82,660,328                      | Triglycerides     | 0.006096  | 0.013395 | -0.020158 | 0.03235   | 0.649696 |
| CpG_3                      | 82,660,376                      | SBP               | -0.079248 | 0.225902 | -0.522007 | 0.363512  | 0.726223 |
| CpG_3                      | 82,660,376                      | DBP               | -0.005988 | 0.13968  | -0.279755 | 0.267779  | 0.96586  |
| CpG_3                      | 82,660,376                      | Total cholesterol | -0.02869  | 0.013462 | -0.055075 | -0.002305 | 0.034681 |
| CpG_3                      | 82,660,376                      | HDL               | 0.010028  | 0.004117 | 0.001958  | 0.018098  | 0.016031 |
| CpG_3                      | 82,660,376                      | LDL               | -0.022954 | 0.012373 | -0.047205 | 0.001297  | 0.065528 |
| CpG_3                      | 82,660,376                      | Triglycerides     | -0.035479 | 0.015293 | -0.065453 | -0.005506 | 0.021672 |
| CpG_9                      | 82,660,464                      | SBP               | 0.17842   | 0.145838 | -0.107417 | 0.464258  | 0.223066 |
| CpG_9                      | 82,660,464                      | DBP               | 0.072464  | 0.090335 | -0.104588 | 0.249516  | 0.423705 |
| CpG_9                      | 82,660,464                      | Total cholesterol | 0.005457  | 0.008852 | -0.011892 | 0.022807  | 0.538471 |
| CpG_9                      | 82,660,464                      | HDL               | 0.002557  | 0.00279  | -0.00291  | 0.008024  | 0.360786 |
| CpG_9                      | 82,660,464                      | LDL               | 0.004802  | 0.008098 | -0.01107  | 0.020674  | 0.554098 |
| CpG_9                      | 82,660,464                      | Triglycerides     | -0.011302 | 0.010062 | -0.031024 | 0.00842   | 0.263101 |
| CpG_11                     | 82,660,490                      | SBP               | -0.051217 | 0.216455 | -0.47546  | 0.373026  | 0.813282 |
| CpG_11                     | 82,660,490                      | DBP               | -0.081348 | 0.135677 | -0.34727  | 0.184573  | 0.549713 |
| CpG_11                     | 82,660,490                      | Total cholesterol | 0.013682  | 0.012988 | -0.011775 | 0.039138  | 0.293885 |
| CpG_11                     | 82,660,490                      | HDL               | -0.000675 | 0.004138 | -0.008786 | 0.007435  | 0.870593 |

|           |                       |                   |           |          |           |          |          |
|-----------|-----------------------|-------------------|-----------|----------|-----------|----------|----------|
| CpG_11    | 82,660,490            | LDL               | 0.02011   | 0.012091 | -0.003588 | 0.043808 | 0.098388 |
| CpG_11    | 82,660,490            | Triglycerides     | -0.002887 | 0.014061 | -0.030447 | 0.024673 | 0.837611 |
| CpG_12    | 82,660,505            | SBP               | 0.542324  | 0.429483 | -0.299447 | 1.384095 | 0.208617 |
| CpG_12    | 82,660,505            | DBP               | 0.179414  | 0.266279 | -0.342484 | 0.701312 | 0.501474 |
| CpG_12    | 82,660,505            | Total cholesterol | 0.019197  | 0.026051 | -0.031863 | 0.070256 | 0.46232  |
| CpG_12    | 82,660,505            | HDL               | -0.012114 | 0.008178 | -0.028143 | 0.003915 | 0.140595 |
| CpG_12    | 82,660,505            | LDL               | 0.032155  | 0.023716 | -0.014327 | 0.078637 | 0.177162 |
| CpG_12    | 82,660,505            | Triglycerides     | 0.008608  | 0.029743 | -0.049688 | 0.066904 | 0.77266  |
| CpG_13    | 82,660,554            | SBP               | 0.67933   | 0.683252 | -0.659818 | 2.018479 | 0.321676 |
| CpG_13    | 82,660,554            | DBP               | 0.59711   | 0.420631 | -0.227311 | 1.421531 | 0.157784 |
| CpG_13    | 82,660,554            | Total cholesterol | 0.03191   | 0.041191 | -0.048823 | 0.112643 | 0.43972  |
| CpG_13    | 82,660,554            | HDL               | -0.013385 | 0.012981 | -0.038827 | 0.012057 | 0.304106 |
| CpG_13    | 82,660,554            | LDL               | 0.008374  | 0.037734 | -0.065582 | 0.082331 | 0.824665 |
| CpG_13    | 82,660,554            | Triglycerides     | 0.014427  | 0.047036 | -0.077762 | 0.106615 | 0.759475 |
| CpG_15    | 82,660,630            | SBP               | 0.746572  | 0.45478  | -0.14478  | 1.637925 | 0.102808 |
| CpG_15    | 82,660,630            | DBP               | 0.418479  | 0.273931 | -0.118417 | 0.955374 | 0.128741 |
| CpG_15    | 82,660,630            | Total cholesterol | 0.033825  | 0.026587 | -0.018284 | 0.085934 | 0.205274 |
| CpG_15    | 82,660,630            | HDL               | -0.001987 | 0.007025 | -0.015757 | 0.011782 | 0.777688 |
| CpG_15    | 82,660,630            | LDL               | 0.009508  | 0.024213 | -0.037948 | 0.056965 | 0.695109 |
| CpG_15    | 82,660,630            | Triglycerides     | -0.009255 | 0.029768 | -0.067599 | 0.049089 | 0.756309 |
| CpG_16-17 | 82,660,652-82,660,654 | SBP               | 0.534412  | 0.37973  | -0.209845 | 1.278669 | 0.161436 |
| CpG_16-17 | 82,660,652-82,660,654 | DBP               | 0.266154  | 0.228934 | -0.182547 | 0.714856 | 0.246883 |
| CpG_16-17 | 82,660,652-82,660,654 | Total cholesterol | 0.012362  | 0.022249 | -0.031246 | 0.05597  | 0.579315 |
| CpG_16-17 | 82,660,652-82,660,654 | HDL               | -0.006543 | 0.00583  | -0.01797  | 0.004884 | 0.263557 |
| CpG_16-17 | 82,660,652-82,660,654 | LDL               | 0.018677  | 0.020075 | -0.02067  | 0.058024 | 0.353728 |
| CpG_16-17 | 82,660,652-82,660,654 | Triglycerides     | -0.027857 | 0.024704 | -0.076276 | 0.020562 | 0.261306 |
| CpG_22    | 82,660,690            | SBP               | 0.702769  | 0.361155 | -0.005081 | 1.410619 | 0.053575 |
| CpG_22    | 82,660,690            | DBP               | 0.325921  | 0.218407 | -0.102149 | 0.753992 | 0.137773 |
| CpG_22    | 82,660,690            | Total cholesterol | 0.03943   | 0.021039 | -0.001805 | 0.080666 | 0.062878 |
| CpG_22    | 82,660,690            | HDL               | -0.002886 | 0.005591 | -0.013844 | 0.008072 | 0.606478 |
| CpG_22    | 82,660,690            | LDL               | 0.010085  | 0.01924  | -0.027625 | 0.047794 | 0.600959 |
| CpG_22    | 82,660,690            | Triglycerides     | 0.003946  | 0.02371  | -0.042525 | 0.050417 | 0.868055 |
| CpG_23    | 82,660,705            | SBP               | 0.416066  | 0.297718 | -0.167451 | 0.999582 | 0.164364 |

|           |                       |                   |           |          |           |          |          |
|-----------|-----------------------|-------------------|-----------|----------|-----------|----------|----------|
| CpG_23    | 82,660,705            | DBP               | 0.281037  | 0.1788   | -0.069405 | 0.631479 | 0.118148 |
| CpG_23    | 82,660,705            | Total cholesterol | 0.03212   | 0.017254 | -0.001698 | 0.065937 | 0.064646 |
| CpG_23    | 82,660,705            | HDL               | -0.003753 | 0.004578 | -0.012727 | 0.00522  | 0.41364  |
| CpG_23    | 82,660,705            | LDL               | 0.023218  | 0.015663 | -0.007481 | 0.053917 | 0.140386 |
| CpG_23    | 82,660,705            | Triglycerides     | -0.008695 | 0.019431 | -0.046778 | 0.029388 | 0.65518  |
| CpG_27-29 | 82,660,761-82,660,767 | SBP               | 0.734126  | 0.550332 | -0.344505 | 1.812758 | 0.184365 |
| CpG_27-29 | 82,660,761-82,660,767 | DBP               | 0.520789  | 0.327172 | -0.120457 | 1.162035 | 0.113672 |
| CpG_27-29 | 82,660,761-82,660,767 | Total cholesterol | 0.05131   | 0.031727 | -0.010874 | 0.113493 | 0.108046 |
| CpG_27-29 | 82,660,761-82,660,767 | HDL               | -0.007713 | 0.008481 | -0.024336 | 0.008909 | 0.364639 |
| CpG_27-29 | 82,660,761-82,660,767 | LDL               | 0.042626  | 0.028321 | -0.012882 | 0.098134 | 0.134537 |
| CpG_27-29 | 82,660,761-82,660,767 | Triglycerides     | -0.008265 | 0.036123 | -0.079064 | 0.062535 | 0.81936  |
| CpG_30-31 | 82,660,774-82,660,779 | SBP               | 0.495146  | 0.462789 | -0.411903 | 1.402195 | 0.286422 |
| CpG_30-31 | 82,660,774-82,660,779 | DBP               | 0.269866  | 0.278299 | -0.275589 | 0.815322 | 0.333799 |
| CpG_30-31 | 82,660,774-82,660,779 | Total cholesterol | 0.020207  | 0.026966 | -0.032645 | 0.073059 | 0.45483  |
| CpG_30-31 | 82,660,774-82,660,779 | HDL               | -0.003469 | 0.007087 | -0.017359 | 0.01042  | 0.625171 |
| CpG_30-31 | 82,660,774-82,660,779 | LDL               | 0.039763  | 0.02415  | -0.007571 | 0.087097 | 0.101818 |
| CpG_30-31 | 82,660,774-82,660,779 | Triglycerides     | -0.034416 | 0.030013 | -0.093241 | 0.024408 | 0.253364 |
| CpG_32    | 82,660,791            | SBP               | -0.191229 | 0.554607 | -1.278238 | 0.89578  | 0.730797 |
| CpG_32    | 82,660,791            | DBP               | -0.197709 | 0.331405 | -0.84725  | 0.451833 | 0.551819 |
| CpG_32    | 82,660,791            | Total cholesterol | -0.05107  | 0.029381 | -0.108656 | 0.006515 | 0.084507 |
| CpG_32    | 82,660,791            | HDL               | 0.007522  | 0.008434 | -0.009007 | 0.024052 | 0.374044 |
| CpG_32    | 82,660,791            | LDL               | -0.03806  | 0.026712 | -0.090414 | 0.014294 | 0.156564 |
| CpG_32    | 82,660,791            | Triglycerides     | -0.038336 | 0.032747 | -0.102519 | 0.025847 | 0.243836 |
| CpG_36    | 82,660,826            | SBP               | 0.260839  | 0.47032  | -0.660971 | 1.182648 | 0.580048 |
| CpG_36    | 82,660,826            | DBP               | 0.124796  | 0.283893 | -0.431624 | 0.681216 | 0.660909 |
| CpG_36    | 82,660,826            | Total cholesterol | 0.007255  | 0.02752  | -0.046683 | 0.061192 | 0.79245  |
| CpG_36    | 82,660,826            | HDL               | 0.004084  | 0.007308 | -0.010239 | 0.018408 | 0.57712  |
| CpG_36    | 82,660,826            | LDL               | 0.023804  | 0.024977 | -0.025149 | 0.072758 | 0.342188 |
| CpG_36    | 82,660,826            | Triglycerides     | -0.041749 | 0.030795 | -0.102106 | 0.018607 | 0.17734  |
| CpG_37    | 82,660,834            | SBP               | 2.477404  | 1.478709 | -0.420811 | 5.37562  | 0.095985 |
| CpG_37    | 82,660,834            | DBP               | 0.906371  | 0.894944 | -0.847688 | 2.660429 | 0.312835 |
| CpG_37    | 82,660,834            | Total cholesterol | 0.034614  | 0.086881 | -0.135669 | 0.204898 | 0.690901 |
| CpG_37    | 82,660,834            | HDL               | -0.019058 | 0.022798 | -0.063741 | 0.025626 | 0.404534 |

|           |                       |                   |           |          |           |           |          |
|-----------|-----------------------|-------------------|-----------|----------|-----------|-----------|----------|
| CpG_37    | 82,660,834            | LDL               | 0.039305  | 0.079345 | -0.116209 | 0.194819  | 0.621081 |
| CpG_37    | 82,660,834            | Triglycerides     | -0.025527 | 0.096809 | -0.215269 | 0.164216  | 0.792394 |
| CpG_38    | 82,660,843            | SBP               | 0.246935  | 0.36795  | -0.474234 | 0.968104  | 0.503306 |
| CpG_38    | 82,660,843            | DBP               | -0.057459 | 0.227517 | -0.503384 | 0.388465  | 0.801003 |
| CpG_38    | 82,660,843            | Total cholesterol | -0.000824 | 0.020528 | -0.041058 | 0.03941   | 0.968029 |
| CpG_38    | 82,660,843            | HDL               | -0.00753  | 0.005576 | -0.018458 | 0.003399  | 0.179152 |
| CpG_38    | 82,660,843            | LDL               | 0.010678  | 0.018859 | -0.026284 | 0.04764   | 0.572188 |
| CpG_38    | 82,660,843            | Triglycerides     | -0.000527 | 0.022634 | -0.044888 | 0.043835  | 0.981471 |
| CpG_39-42 | 82,660,847-82,660,855 | SBP               | 0.549104  | 0.281839 | -0.003291 | 1.101499  | 0.053715 |
| CpG_39-42 | 82,660,847-82,660,855 | DBP               | 0.280932  | 0.168307 | -0.048943 | 0.610807  | 0.097692 |
| CpG_39-42 | 82,660,847-82,660,855 | Total cholesterol | 0.023106  | 0.015183 | -0.006652 | 0.052864  | 0.130661 |
| CpG_39-42 | 82,660,847-82,660,855 | HDL               | -0.001388 | 0.004283 | -0.009782 | 0.007007  | 0.746506 |
| CpG_39-42 | 82,660,847-82,660,855 | LDL               | 0.012099  | 0.01323  | -0.013831 | 0.038029  | 0.362262 |
| CpG_39-42 | 82,660,847-82,660,855 | Triglycerides     | 0.001501  | 0.015711 | -0.029291 | 0.032294  | 0.924025 |
| CpG_43    | 82,660,866            | SBP               | -0.084982 | 0.103983 | -0.288785 | 0.118821  | 0.4151   |
| CpG_43    | 82,660,866            | DBP               | -0.024806 | 0.062666 | -0.147629 | 0.098017  | 0.692789 |
| CpG_43    | 82,660,866            | Total cholesterol | -0.012357 | 0.005976 | -0.02407  | -0.000643 | 0.040416 |
| CpG_43    | 82,660,866            | HDL               | 0.003104  | 0.001573 | 2.13E-05  | 0.006187  | 0.050301 |
| CpG_43    | 82,660,866            | LDL               | -0.011973 | 0.005392 | -0.02254  | -0.001406 | 0.027902 |
| CpG_43    | 82,660,866            | Triglycerides     | -0.009531 | 0.006707 | -0.022676 | 0.003615  | 0.157427 |
| CpG_45    | 82,660,890            | SBP               | 0.435479  | 0.357369 | -0.264952 | 1.13591   | 0.224973 |
| CpG_45    | 82,660,890            | DBP               | 0.373797  | 0.213437 | -0.044533 | 0.792126  | 0.081991 |
| CpG_45    | 82,660,890            | Total cholesterol | 0.023379  | 0.02072  | -0.017231 | 0.063989  | 0.261014 |
| CpG_45    | 82,660,890            | HDL               | -0.002778 | 0.005497 | -0.013551 | 0.007995  | 0.613981 |
| CpG_45    | 82,660,890            | LDL               | 0.017955  | 0.018706 | -0.018708 | 0.054618  | 0.338705 |
| CpG_45    | 82,660,890            | Triglycerides     | -0.009883 | 0.023294 | -0.055537 | 0.035772  | 0.671984 |
| CpG_52    | 82,661,050            | SBP               | 0.833668  | 0.704126 | -0.546394 | 2.213729  | 0.238374 |
| CpG_52    | 82,661,050            | DBP               | 0.23099   | 0.431622 | -0.614974 | 1.076954  | 0.593359 |
| CpG_52    | 82,661,050            | Total cholesterol | 0.044263  | 0.042253 | -0.038551 | 0.127076  | 0.296581 |
| CpG_52    | 82,661,050            | HDL               | -0.011936 | 0.011681 | -0.03483  | 0.010958  | 0.308544 |
| CpG_52    | 82,661,050            | LDL               | 0.049992  | 0.03828  | -0.025036 | 0.12502   | 0.193657 |
| CpG_52    | 82,661,050            | Triglycerides     | 0.009285  | 0.046871 | -0.082579 | 0.10115   | 0.843242 |
| CpG_53    | 82,661,087            | SBP               | 0.491559  | 0.4527   | -0.395717 | 1.378835  | 0.279515 |

|           |                       |                   |           |          |           |          |          |
|-----------|-----------------------|-------------------|-----------|----------|-----------|----------|----------|
| CpG_53    | 82,661,087            | DBP               | 0.323055  | 0.266161 | -0.198611 | 0.844721 | 0.226991 |
| CpG_53    | 82,661,087            | Total cholesterol | 0.039868  | 0.025839 | -0.010776 | 0.090512 | 0.125209 |
| CpG_53    | 82,661,087            | HDL               | -0.010713 | 0.007194 | -0.024812 | 0.003386 | 0.138784 |
| CpG_53    | 82,661,087            | LDL               | 0.025682  | 0.022729 | -0.018866 | 0.07023  | 0.260546 |
| CpG_53    | 82,661,087            | Triglycerides     | 0.047994  | 0.029881 | -0.01057  | 0.106559 | 0.110582 |
| CpG_54    | 82,661,095            | SBP               | 0.147554  | 0.690187 | -1.205188 | 1.500295 | 0.831015 |
| CpG_54    | 82,661,095            | DBP               | -0.176059 | 0.421263 | -1.00172  | 0.649601 | 0.67662  |
| CpG_54    | 82,661,095            | Total cholesterol | -0.043605 | 0.041121 | -0.124201 | 0.036991 | 0.290727 |
| CpG_54    | 82,661,095            | HDL               | 0.002436  | 0.011408 | -0.019924 | 0.024795 | 0.831218 |
| CpG_54    | 82,661,095            | LDL               | -0.033891 | 0.037379 | -0.107153 | 0.039371 | 0.366093 |
| CpG_54    | 82,661,095            | Triglycerides     | -0.026906 | 0.045571 | -0.116223 | 0.062412 | 0.555833 |
| CpG_57-58 | 82,661,139-82,661,141 | SBP               | -0.225779 | 0.607353 | -1.416169 | 0.964612 | 0.710651 |
| CpG_57-58 | 82,661,139-82,661,141 | DBP               | -0.055074 | 0.369086 | -0.778468 | 0.668321 | 0.881599 |
| CpG_57-58 | 82,661,139-82,661,141 | Total cholesterol | -0.062828 | 0.034813 | -0.131061 | 0.005405 | 0.073269 |
| CpG_57-58 | 82,661,139-82,661,141 | HDL               | 0.00977   | 0.009866 | -0.009566 | 0.029106 | 0.323722 |
| CpG_57-58 | 82,661,139-82,661,141 | LDL               | -0.048121 | 0.031029 | -0.108937 | 0.012695 | 0.123216 |
| CpG_57-58 | 82,661,139-82,661,141 | Triglycerides     | -0.055226 | 0.039691 | -0.133018 | 0.022566 | 0.166306 |
| CpG_62-64 | 82,661,175-82,661,188 | SBP               | 0.108363  | 0.695459 | -1.254712 | 1.471439 | 0.876413 |
| CpG_62-64 | 82,661,175-82,661,188 | DBP               | -0.126918 | 0.4197   | -0.949514 | 0.695678 | 0.762814 |
| CpG_62-64 | 82,661,175-82,661,188 | Total cholesterol | 0.001013  | 0.039197 | -0.075812 | 0.077838 | 0.979423 |
| CpG_62-64 | 82,661,175-82,661,188 | HDL               | -0.010636 | 0.011095 | -0.032382 | 0.01111  | 0.339461 |
| CpG_62-64 | 82,661,175-82,661,188 | LDL               | -0.006097 | 0.035008 | -0.07471  | 0.062517 | 0.862004 |
| CpG_62-64 | 82,661,175-82,661,188 | Triglycerides     | 0.031543  | 0.045404 | -0.057447 | 0.120533 | 0.488425 |
| CpG_66    | 82,661,202            | SBP               | 0.142647  | 0.353305 | -0.549818 | 0.835112 | 0.686999 |
| CpG_66    | 82,661,202            | DBP               | 0.066854  | 0.215859 | -0.356223 | 0.489931 | 0.757231 |
| CpG_66    | 82,661,202            | Total cholesterol | 0.033854  | 0.020631 | -0.006582 | 0.074291 | 0.102993 |
| CpG_66    | 82,661,202            | HDL               | -0.007375 | 0.005823 | -0.018788 | 0.004039 | 0.207421 |
| CpG_66    | 82,661,202            | LDL               | 0.025397  | 0.018905 | -0.011656 | 0.06245  | 0.181263 |
| CpG_66    | 82,661,202            | Triglycerides     | 0.033075  | 0.023135 | -0.012268 | 0.078418 | 0.154972 |
| CpG_67    | 82,661,217            | SBP               | 0.166644  | 0.42106  | -0.658618 | 0.991906 | 0.692871 |
| CpG_67    | 82,661,217            | DBP               | 0.044795  | 0.257703 | -0.460295 | 0.549884 | 0.862254 |
| CpG_67    | 82,661,217            | Total cholesterol | 0.004204  | 0.025613 | -0.045996 | 0.054404 | 0.869856 |
| CpG_67    | 82,661,217            | HDL               | 0.010154  | 0.006983 | -0.003532 | 0.023839 | 0.14811  |

|           |                       |                   |           |          |           |          |          |
|-----------|-----------------------|-------------------|-----------|----------|-----------|----------|----------|
| CpG_67    | 82,661,217            | LDL               | 0.011508  | 0.023225 | -0.034012 | 0.057029 | 0.621018 |
| CpG_67    | 82,661,217            | Triglycerides     | -0.032829 | 0.028142 | -0.087986 | 0.022328 | 0.24535  |
| CpG_69-70 | 82,661,244-82,661,248 | SBP               | 0.560295  | 0.934932 | -1.272138 | 2.392728 | 0.549984 |
| CpG_69-70 | 82,661,244-82,661,248 | DBP               | -0.166063 | 0.56731  | -1.277971 | 0.945844 | 0.770185 |
| CpG_69-70 | 82,661,244-82,661,248 | Total cholesterol | -0.045469 | 0.053532 | -0.15039  | 0.059452 | 0.397163 |
| CpG_69-70 | 82,661,244-82,661,248 | HDL               | 0.000398  | 0.01501  | -0.029021 | 0.029817 | 0.978904 |
| CpG_69-70 | 82,661,244-82,661,248 | LDL               | -0.052197 | 0.047422 | -0.145143 | 0.040748 | 0.272985 |
| CpG_69-70 | 82,661,244-82,661,248 | Triglycerides     | 0.00496   | 0.061823 | -0.11621  | 0.12613  | 0.936175 |
| CpG_71-72 | 82,661,267-82,661,275 | SBP               | 0.068628  | 0.54072  | -0.991163 | 1.12842  | 0.899188 |
| CpG_71-72 | 82,661,267-82,661,275 | DBP               | -0.139369 | 0.328105 | -0.782443 | 0.503705 | 0.671666 |
| CpG_71-72 | 82,661,267-82,661,275 | Total cholesterol | -0.032169 | 0.031069 | -0.093062 | 0.028724 | 0.30227  |
| CpG_71-72 | 82,661,267-82,661,275 | HDL               | -0.00876  | 0.008862 | -0.026129 | 0.008608 | 0.324596 |
| CpG_71-72 | 82,661,267-82,661,275 | LDL               | -0.028258 | 0.027501 | -0.082159 | 0.025643 | 0.305974 |
| CpG_71-72 | 82,661,267-82,661,275 | Triglycerides     | 0.014181  | 0.035961 | -0.0563   | 0.084663 | 0.693921 |
| CpG_73-74 | 82,661,285-82,661,290 | SBP               | 0.355753  | 0.349985 | -0.330205 | 1.04171  | 0.311179 |
| CpG_73-74 | 82,661,285-82,661,290 | DBP               | 0.029526  | 0.21367  | -0.389259 | 0.448311 | 0.890295 |
| CpG_73-74 | 82,661,285-82,661,290 | Total cholesterol | -0.01835  | 0.019998 | -0.057546 | 0.020845 | 0.360419 |
| CpG_73-74 | 82,661,285-82,661,290 | HDL               | -0.008066 | 0.005721 | -0.019279 | 0.003146 | 0.160762 |
| CpG_73-74 | 82,661,285-82,661,290 | LDL               | -0.006106 | 0.017934 | -0.041257 | 0.029044 | 0.73401  |
| CpG_73-74 | 82,661,285-82,661,290 | Triglycerides     | -0.006695 | 0.023151 | -0.052071 | 0.038681 | 0.772865 |
| CpG_75-76 | 82,661,313-82,661,326 | SBP               | 0.564749  | 0.555803 | -0.524605 | 1.654103 | 0.311443 |
| CpG_75-76 | 82,661,313-82,661,326 | DBP               | 0.119929  | 0.337393 | -0.54135  | 0.781208 | 0.722815 |
| CpG_75-76 | 82,661,313-82,661,326 | Total cholesterol | 0.025213  | 0.031641 | -0.036803 | 0.087228 | 0.426968 |
| CpG_75-76 | 82,661,313-82,661,326 | HDL               | 0.003144  | 0.008616 | -0.013743 | 0.020031 | 0.71575  |
| CpG_75-76 | 82,661,313-82,661,326 | LDL               | 0.045316  | 0.027783 | -0.009138 | 0.099769 | 0.105259 |
| CpG_75-76 | 82,661,313-82,661,326 | Triglycerides     | -0.047178 | 0.036515 | -0.118746 | 0.024389 | 0.198586 |
| CpG_77-81 | 82,661,336-82,661,349 | SBP               | 0.869702  | 0.723515 | -0.548361 | 2.287765 | 0.231402 |
| CpG_77-81 | 82,661,336-82,661,349 | DBP               | -0.086942 | 0.440425 | -0.950159 | 0.776276 | 0.843802 |
| CpG_77-81 | 82,661,336-82,661,349 | Total cholesterol | -0.033635 | 0.041544 | -0.115059 | 0.047788 | 0.419529 |
| CpG_77-81 | 82,661,336-82,661,349 | HDL               | -0.020498 | 0.011459 | -0.042957 | 0.00196  | 0.075812 |
| CpG_77-81 | 82,661,336-82,661,349 | LDL               | 0.00234   | 0.036845 | -0.069875 | 0.074555 | 0.949449 |
| CpG_77-81 | 82,661,336-82,661,349 | Triglycerides     | -0.027873 | 0.047755 | -0.121472 | 0.065725 | 0.560387 |
| CpG_83    | 82,661,360            | SBP               | 0.225214  | 0.32876  | -0.419143 | 0.869571 | 0.494434 |

|           |                       |                   |           |          |           |           |          |
|-----------|-----------------------|-------------------|-----------|----------|-----------|-----------|----------|
| CpG_83    | 82,661,360            | DBP               | 0.086087  | 0.199531 | -0.304986 | 0.47716   | 0.666797 |
| CpG_83    | 82,661,360            | Total cholesterol | 0.019272  | 0.019146 | -0.018253 | 0.056796  | 0.315839 |
| CpG_83    | 82,661,360            | HDL               | -0.008065 | 0.005369 | -0.018587 | 0.002458  | 0.135281 |
| CpG_83    | 82,661,360            | LDL               | 0.02316   | 0.017006 | -0.010172 | 0.056492  | 0.175413 |
| CpG_83    | 82,661,360            | Triglycerides     | 0.010418  | 0.021813 | -0.032335 | 0.05317   | 0.633669 |
| CpG_84-85 | 82,661,384-82,661,390 | SBP               | 0.279558  | 0.366998 | -0.439745 | 0.998861  | 0.447495 |
| CpG_84-85 | 82,661,384-82,661,390 | DBP               | 0.223755  | 0.221954 | -0.211266 | 0.658776  | 0.315139 |
| CpG_84-85 | 82,661,384-82,661,390 | Total cholesterol | -0.024481 | 0.021395 | -0.066414 | 0.017453  | 0.254471 |
| CpG_84-85 | 82,661,384-82,661,390 | HDL               | -0.006707 | 0.006031 | -0.018528 | 0.005114  | 0.268007 |
| CpG_84-85 | 82,661,384-82,661,390 | LDL               | -0.015319 | 0.019108 | -0.052771 | 0.022132  | 0.424077 |
| CpG_84-85 | 82,661,384-82,661,390 | Triglycerides     | -0.002751 | 0.024361 | -0.050498 | 0.044996  | 0.910239 |
| CpG_86    | 82,661,399            | SBP               | -0.091269 | 0.282174 | -0.64432  | 0.461782  | 0.746825 |
| CpG_86    | 82,661,399            | DBP               | 0.077914  | 0.172245 | -0.259681 | 0.415508  | 0.651704 |
| CpG_86    | 82,661,399            | Total cholesterol | 0.004094  | 0.016923 | -0.029074 | 0.037262  | 0.809179 |
| CpG_86    | 82,661,399            | HDL               | -0.010598 | 0.004595 | -0.019604 | -0.001592 | 0.022506 |
| CpG_86    | 82,661,399            | LDL               | 0.023295  | 0.015273 | -0.006639 | 0.053229  | 0.129392 |
| CpG_86    | 82,661,399            | Triglycerides     | -0.017275 | 0.018653 | -0.053834 | 0.019284  | 0.355924 |
| CpG_87-88 | 82,661,404-82,661,413 | SBP               | 0.220375  | 0.371099 | -0.506966 | 0.947716  | 0.553568 |
| CpG_87-88 | 82,661,404-82,661,413 | DBP               | 0.214288  | 0.226126 | -0.22891  | 0.657487  | 0.344928 |
| CpG_87-88 | 82,661,404-82,661,413 | Total cholesterol | 0.008764  | 0.022063 | -0.03448  | 0.052008  | 0.691805 |
| CpG_87-88 | 82,661,404-82,661,413 | HDL               | -0.009072 | 0.006095 | -0.021017 | 0.002873  | 0.138843 |
| CpG_87-88 | 82,661,404-82,661,413 | LDL               | 0.024199  | 0.019813 | -0.014634 | 0.063033  | 0.223989 |
| CpG_87-88 | 82,661,404-82,661,413 | Triglycerides     | -0.012678 | 0.024571 | -0.060837 | 0.035481  | 0.606679 |
| CpG_89    | 82,661,421            | SBP               | 0.466716  | 0.470231 | -0.45492  | 1.388352  | 0.322691 |
| CpG_89    | 82,661,421            | DBP               | 0.182498  | 0.290497 | -0.386866 | 0.751863  | 0.530901 |
| CpG_89    | 82,661,421            | Total cholesterol | 0.070758  | 0.02846  | 0.014978  | 0.126538  | 0.014103 |
| CpG_89    | 82,661,421            | HDL               | -0.005347 | 0.007946 | -0.020921 | 0.010226  | 0.502082 |
| CpG_89    | 82,661,421            | LDL               | 0.07327   | 0.025654 | 0.022988  | 0.123551  | 0.004958 |
| CpG_89    | 82,661,421            | Triglycerides     | 0.006133  | 0.031979 | -0.056544 | 0.06881   | 0.84819  |
| CpG_90    | 82,661,438            | SBP               | 0.089408  | 0.398745 | -0.692118 | 0.870934  | 0.822902 |
| CpG_90    | 82,661,438            | DBP               | 0.192504  | 0.243001 | -0.283769 | 0.668777  | 0.42955  |
| CpG_90    | 82,661,438            | Total cholesterol | 0.017532  | 0.023851 | -0.029215 | 0.06428   | 0.463482 |
| CpG_90    | 82,661,438            | HDL               | -0.006984 | 0.006579 | -0.019879 | 0.005911  | 0.290235 |

|         |            |                   |           |          |           |           |          |
|---------|------------|-------------------|-----------|----------|-----------|-----------|----------|
| CpG_90  | 82,661,438 | LDL               | 0.034154  | 0.021495 | -0.007975 | 0.076284  | 0.114268 |
| CpG_90  | 82,661,438 | Triglycerides     | -0.017663 | 0.02637  | -0.069348 | 0.034022  | 0.504054 |
| CpG_91  | 82,661,469 | SBP               | 1.542745  | 0.63574  | 0.296717  | 2.788773  | 0.016557 |
| CpG_91  | 82,661,469 | DBP               | 0.789033  | 0.388214 | 0.028148  | 1.549919  | 0.044067 |
| CpG_91  | 82,661,469 | Total cholesterol | 0.049163  | 0.037029 | -0.023412 | 0.121738  | 0.186498 |
| CpG_91  | 82,661,469 | HDL               | 0.001039  | 0.011022 | -0.020563 | 0.022641  | 0.925003 |
| CpG_91  | 82,661,469 | LDL               | 0.062813  | 0.033253 | -0.002363 | 0.127988  | 0.061048 |
| CpG_91  | 82,661,469 | Triglycerides     | -0.027463 | 0.044052 | -0.113803 | 0.058877  | 0.534051 |
| CpG_92  | 82,661,480 | SBP               | 0.593052  | 0.544606 | -0.474356 | 1.66046   | 0.278128 |
| CpG_92  | 82,661,480 | DBP               | 0.240867  | 0.3301   | -0.406116 | 0.887851  | 0.466859 |
| CpG_92  | 82,661,480 | Total cholesterol | 0.008931  | 0.03124  | -0.052298 | 0.070159  | 0.775415 |
| CpG_92  | 82,661,480 | HDL               | -0.000164 | 0.009179 | -0.018155 | 0.017827  | 0.985761 |
| CpG_92  | 82,661,480 | LDL               | 0.01672   | 0.028487 | -0.039112 | 0.072553  | 0.558222 |
| CpG_92  | 82,661,480 | Triglycerides     | -0.020901 | 0.037118 | -0.093651 | 0.051849  | 0.574302 |
| CpG_104 | 82,661,633 | SBP               | 0.110934  | 0.192085 | -0.265546 | 0.487413  | 0.564609 |
| CpG_104 | 82,661,633 | DBP               | 0.032334  | 0.116681 | -0.196357 | 0.261025  | 0.782144 |
| CpG_104 | 82,661,633 | Total cholesterol | -0.000111 | 0.010691 | -0.021065 | 0.020843  | 0.991746 |
| CpG_104 | 82,661,633 | HDL               | -0.004095 | 0.003186 | -0.010339 | 0.002149  | 0.201017 |
| CpG_104 | 82,661,633 | LDL               | 0.005176  | 0.009523 | -0.01349  | 0.023841  | 0.587768 |
| CpG_104 | 82,661,633 | Triglycerides     | -0.001217 | 0.013035 | -0.026765 | 0.024332  | 0.925791 |
| CpG_106 | 82,661,670 | SBP               | 0.506795  | 0.480051 | -0.434087 | 1.447677  | 0.292999 |
| CpG_106 | 82,661,670 | DBP               | 0.212247  | 0.290894 | -0.357895 | 0.782389  | 0.466886 |
| CpG_106 | 82,661,670 | Total cholesterol | -0.060506 | 0.02703  | -0.113484 | -0.007529 | 0.026825 |
| CpG_106 | 82,661,670 | HDL               | -0.006759 | 0.008065 | -0.022566 | 0.009048  | 0.403464 |
| CpG_106 | 82,661,670 | LDL               | -0.028565 | 0.024823 | -0.077217 | 0.020088  | 0.251901 |
| CpG_106 | 82,661,670 | Triglycerides     | -0.046986 | 0.032484 | -0.110654 | 0.016681  | 0.150372 |
| CpG_107 | 82,661,696 | SBP               | 0.019046  | 0.523099 | -1.006208 | 1.044301  | 0.971013 |
| CpG_107 | 82,661,696 | DBP               | -0.105573 | 0.310949 | -0.715022 | 0.503876  | 0.734785 |
| CpG_107 | 82,661,696 | Total cholesterol | 0.008017  | 0.029152 | -0.049121 | 0.065155  | 0.783765 |
| CpG_107 | 82,661,696 | HDL               | 0.003881  | 0.008591 | -0.012958 | 0.02072   | 0.652238 |
| CpG_107 | 82,661,696 | LDL               | 2.32E-05  | 0.02625  | -0.051425 | 0.051472  | 0.999296 |
| CpG_107 | 82,661,696 | Triglycerides     | 0.007016  | 0.035394 | -0.062355 | 0.076388  | 0.843181 |
| CpG_108 | 82,661,701 | SBP               | 0.140704  | 0.208824 | -0.268584 | 0.549992  | 0.501658 |



|         |            |                   |           |          |           |           |          |
|---------|------------|-------------------|-----------|----------|-----------|-----------|----------|
| CpG_108 | 82,661,701 | DBP               | 0.094066  | 0.126686 | -0.154235 | 0.342367  | 0.459138 |
| CpG_108 | 82,661,701 | Total cholesterol | -0.014666 | 0.011642 | -0.037483 | 0.008151  | 0.210028 |
| CpG_108 | 82,661,701 | HDL               | 0.001342  | 0.003502 | -0.005521 | 0.008205  | 0.702156 |
| CpG_108 | 82,661,701 | LDL               | -0.006596 | 0.010506 | -0.027187 | 0.013996  | 0.531264 |
| CpG_108 | 82,661,701 | Triglycerides     | -0.017827 | 0.014192 | -0.045642 | 0.009988  | 0.21132  |
| CpG_109 | 82,661,725 | SBP               | 0.283921  | 0.274002 | -0.253112 | 0.820955  | 0.301974 |
| CpG_109 | 82,661,725 | DBP               | 0.047927  | 0.166289 | -0.277993 | 0.373846  | 0.773628 |
| CpG_109 | 82,661,725 | Total cholesterol | -0.011911 | 0.015653 | -0.042591 | 0.018768  | 0.448011 |
| CpG_109 | 82,661,725 | HDL               | -0.000122 | 0.004608 | -0.009154 | 0.008909  | 0.978855 |
| CpG_109 | 82,661,725 | LDL               | 0.002755  | 0.014141 | -0.02496  | 0.03047   | 0.845819 |
| CpG_109 | 82,661,725 | Triglycerides     | -0.028507 | 0.018493 | -0.064751 | 0.007738  | 0.125528 |
| CpG_116 | 82,661,812 | SBP               | 0.036431  | 0.275117 | -0.502788 | 0.575649  | 0.894851 |
| CpG_116 | 82,661,812 | DBP               | -0.005844 | 0.166362 | -0.331907 | 0.32022   | 0.972031 |
| CpG_116 | 82,661,812 | Total cholesterol | -0.042729 | 0.015267 | -0.072651 | -0.012807 | 0.00588  |
| CpG_116 | 82,661,812 | HDL               | 0.005516  | 0.004588 | -0.003477 | 0.014509  | 0.231427 |
| CpG_116 | 82,661,812 | LDL               | -0.037989 | 0.013787 | -0.065012 | -0.010966 | 0.006679 |
| CpG_116 | 82,661,812 | Triglycerides     | -0.019331 | 0.0186   | -0.055787 | 0.017124  | 0.300519 |

| CpG site/unit <sup>a</sup> | Position at chr.16 <sup>b</sup> | Trait             | Meta-analysis <sup>d</sup> |          |           |           |          |
|----------------------------|---------------------------------|-------------------|----------------------------|----------|-----------|-----------|----------|
|                            |                                 |                   | Beta                       | SE       | CI_2.5%   | CI_97.5%  | P-value  |
| CpG_1                      | 82,660,317                      | SBP               | -0.30693                   | 0.158644 | -0.617866 | 0.004006  | 0.053026 |
| CpG_1                      | 82,660,317                      | DBP               | -0.10574                   | 0.099056 | -0.299886 | 0.088405  | 0.285754 |
| CpG_1                      | 82,660,317                      | Total cholesterol | -0.004402                  | 0.008907 | -0.021859 | 0.013056  | 0.621175 |
| CpG_1                      | 82,660,317                      | HDL               | 0.005611                   | 0.00275  | 0.000222  | 0.011001  | 0.041277 |
| CpG_1                      | 82,660,317                      | LDL               | -0.009268                  | 0.007487 | -0.023942 | 0.005407  | 0.215799 |
| CpG_1                      | 82,660,317                      | Triglycerides     | 0.003989                   | 0.009515 | -0.01466  | 0.022638  | 0.675029 |
| CpG_2                      | 82,660,328                      | SBP               | -0.398172                  | 0.158584 | -0.708991 | -0.087353 | 0.012046 |
| CpG_2                      | 82,660,328                      | DBP               | -0.149799                  | 0.099418 | -0.344656 | 0.045057  | 0.131874 |
| CpG_2                      | 82,660,328                      | Total cholesterol | 0.004964                   | 0.009061 | -0.012794 | 0.022722  | 0.583786 |
| CpG_2                      | 82,660,328                      | HDL               | 0.001083                   | 0.00282  | -0.004444 | 0.00661   | 0.700972 |
| CpG_2                      | 82,660,328                      | LDL               | -0.00305                   | 0.007622 | -0.017989 | 0.011889  | 0.689035 |
| CpG_2                      | 82,660,328                      | Triglycerides     | 0.003769                   | 0.009719 | -0.015279 | 0.022818  | 0.698127 |
| CpG_3                      | 82,660,376                      | SBP               | -0.063662                  | 0.19622  | -0.448246 | 0.320921  | 0.745601 |
| CpG_3                      | 82,660,376                      | DBP               | 0.03179                    | 0.121897 | -0.207124 | 0.270703  | 0.794254 |
| CpG_3                      | 82,660,376                      | Total cholesterol | -0.020573                  | 0.010901 | -0.041939 | 0.000794  | 0.05914  |
| CpG_3                      | 82,660,376                      | HDL               | 0.005712                   | 0.003374 | -0.000901 | 0.012326  | 0.090483 |
| CpG_3                      | 82,660,376                      | LDL               | -0.018709                  | 0.009296 | -0.03693  | -0.000489 | 0.044165 |
| CpG_3                      | 82,660,376                      | Triglycerides     | -0.021742                  | 0.011735 | -0.044742 | 0.001259  | 0.063926 |
| CpG_9                      | 82,660,464                      | SBP               | 0.146316                   | 0.140346 | -0.128757 | 0.42139   | 0.297162 |
| CpG_9                      | 82,660,464                      | DBP               | 0.069249                   | 0.087045 | -0.101356 | 0.239854  | 0.426293 |
| CpG_9                      | 82,660,464                      | Total cholesterol | 0.011679                   | 0.008356 | -0.004698 | 0.028056  | 0.162211 |
| CpG_9                      | 82,660,464                      | HDL               | 0.003052                   | 0.00264  | -0.002121 | 0.008226  | 0.247505 |
| CpG_9                      | 82,660,464                      | LDL               | 0.011567                   | 0.007467 | -0.003067 | 0.026201  | 0.121342 |
| CpG_9                      | 82,660,464                      | Triglycerides     | -0.006217                  | 0.009353 | -0.024549 | 0.012114  | 0.506212 |
| CpG_11                     | 82,660,490                      | SBP               | -0.001132                  | 0.163209 | -0.321016 | 0.318751  | 0.994464 |
| CpG_11                     | 82,660,490                      | DBP               | 0.032657                   | 0.102116 | -0.167486 | 0.232801  | 0.749115 |
| CpG_11                     | 82,660,490                      | Total cholesterol | 0.016321                   | 0.009344 | -0.001993 | 0.034634  | 0.080695 |
| CpG_11                     | 82,660,490                      | HDL               | 0.00095                    | 0.002988 | -0.004906 | 0.006807  | 0.750517 |

|           |                       |                   |           |          |           |          |          |
|-----------|-----------------------|-------------------|-----------|----------|-----------|----------|----------|
| CpG_11    | 82,660,490            | LDL               | 0.010598  | 0.00787  | -0.004828 | 0.026023 | 0.178119 |
| CpG_11    | 82,660,490            | Triglycerides     | -0.009171 | 0.009757 | -0.028294 | 0.009952 | 0.347241 |
| CpG_12    | 82,660,505            | SBP               | 0.341013  | 0.375626 | -0.3952   | 1.077226 | 0.363956 |
| CpG_12    | 82,660,505            | DBP               | 0.115955  | 0.233764 | -0.342214 | 0.574124 | 0.619869 |
| CpG_12    | 82,660,505            | Total cholesterol | 0.019561  | 0.021048 | -0.021692 | 0.060815 | 0.352708 |
| CpG_12    | 82,660,505            | HDL               | -0.011467 | 0.006639 | -0.024478 | 0.001545 | 0.08413  |
| CpG_12    | 82,660,505            | LDL               | 0.033756  | 0.017871 | -0.00127  | 0.068783 | 0.058908 |
| CpG_12    | 82,660,505            | Triglycerides     | -0.008494 | 0.022717 | -0.053018 | 0.03603  | 0.708465 |
| CpG_13    | 82,660,554            | SBP               | 0.698009  | 0.620878 | -0.518889 | 1.914908 | 0.260916 |
| CpG_13    | 82,660,554            | DBP               | 0.573394  | 0.383725 | -0.178692 | 1.32548  | 0.135101 |
| CpG_13    | 82,660,554            | Total cholesterol | 0.026727  | 0.036189 | -0.044202 | 0.097655 | 0.460189 |
| CpG_13    | 82,660,554            | HDL               | -0.003148 | 0.011402 | -0.025496 | 0.0192   | 0.782477 |
| CpG_13    | 82,660,554            | LDL               | 0.000413  | 0.031597 | -0.061516 | 0.062342 | 0.989579 |
| CpG_13    | 82,660,554            | Triglycerides     | 0.012495  | 0.039794 | -0.065499 | 0.090489 | 0.753521 |
| CpG_15    | 82,660,630            | SBP               | 0.590578  | 0.428602 | -0.249467 | 1.430623 | 0.168229 |
| CpG_15    | 82,660,630            | DBP               | 0.251523  | 0.259681 | -0.257441 | 0.760488 | 0.332751 |
| CpG_15    | 82,660,630            | Total cholesterol | 0.041188  | 0.025132 | -0.00807  | 0.090445 | 0.101242 |
| CpG_15    | 82,660,630            | HDL               | -0.000693 | 0.006784 | -0.01399  | 0.012604 | 0.918599 |
| CpG_15    | 82,660,630            | LDL               | 0.021752  | 0.022372 | -0.022096 | 0.0656   | 0.330897 |
| CpG_15    | 82,660,630            | Triglycerides     | -0.018004 | 0.027799 | -0.072489 | 0.036481 | 0.517211 |
| CpG_16-17 | 82,660,652-82,660,654 | SBP               | 0.54396   | 0.366738 | -0.174834 | 1.262754 | 0.138012 |
| CpG_16-17 | 82,660,652-82,660,654 | DBP               | 0.285912  | 0.221997 | -0.149196 | 0.721019 | 0.197779 |
| CpG_16-17 | 82,660,652-82,660,654 | Total cholesterol | 0.01483   | 0.021094 | -0.026513 | 0.056173 | 0.482018 |
| CpG_16-17 | 82,660,652-82,660,654 | HDL               | -0.006266 | 0.005642 | -0.017325 | 0.004793 | 0.266781 |
| CpG_16-17 | 82,660,652-82,660,654 | LDL               | 0.012495  | 0.018654 | -0.024067 | 0.049057 | 0.502967 |
| CpG_16-17 | 82,660,652-82,660,654 | Triglycerides     | -0.016588 | 0.023167 | -0.061993 | 0.028818 | 0.473979 |
| CpG_22    | 82,660,690            | SBP               | 0.600287  | 0.33581  | -0.057888 | 1.258461 | 0.073844 |
| CpG_22    | 82,660,690            | DBP               | 0.24048   | 0.204644 | -0.160615 | 0.641574 | 0.239949 |
| CpG_22    | 82,660,690            | Total cholesterol | 0.041553  | 0.019483 | 0.003367  | 0.079738 | 0.032943 |
| CpG_22    | 82,660,690            | HDL               | -0.000227 | 0.005322 | -0.010658 | 0.010204 | 0.966012 |
| CpG_22    | 82,660,690            | LDL               | 0.015509  | 0.017281 | -0.018362 | 0.04938  | 0.369492 |
| CpG_22    | 82,660,690            | Triglycerides     | -0.002373 | 0.021568 | -0.044646 | 0.0399   | 0.912392 |
| CpG_23    | 82,660,705            | SBP               | 0.34439   | 0.293511 | -0.230881 | 0.919661 | 0.240657 |

|           |                       |                   |           |          |           |           |          |
|-----------|-----------------------|-------------------|-----------|----------|-----------|-----------|----------|
| CpG_23    | 82,660,705            | DBP               | 0.229645  | 0.176568 | -0.116421 | 0.575711  | 0.193393 |
| CpG_23    | 82,660,705            | Total cholesterol | 0.032912  | 0.017008 | -0.000423 | 0.066247  | 0.052978 |
| CpG_23    | 82,660,705            | HDL               | -0.003545 | 0.004538 | -0.012439 | 0.005348  | 0.434624 |
| CpG_23    | 82,660,705            | LDL               | 0.022686  | 0.015349 | -0.007397 | 0.05277   | 0.139392 |
| CpG_23    | 82,660,705            | Triglycerides     | -0.00884  | 0.019083 | -0.046243 | 0.028562  | 0.643186 |
| CpG_27-29 | 82,660,761-82,660,767 | SBP               | 0.544607  | 0.489059 | -0.41393  | 1.503144  | 0.265458 |
| CpG_27-29 | 82,660,761-82,660,767 | DBP               | 0.374742  | 0.295667 | -0.204754 | 0.954238  | 0.204995 |
| CpG_27-29 | 82,660,761-82,660,767 | Total cholesterol | 0.033222  | 0.028081 | -0.021816 | 0.088261  | 0.236779 |
| CpG_27-29 | 82,660,761-82,660,767 | HDL               | -0.015755 | 0.007795 | -0.031032 | -0.000478 | 0.043249 |
| CpG_27-29 | 82,660,761-82,660,767 | LDL               | 0.039738  | 0.0241   | -0.007498 | 0.086973  | 0.099179 |
| CpG_27-29 | 82,660,761-82,660,767 | Triglycerides     | 0.005853  | 0.030977 | -0.054861 | 0.066567  | 0.850146 |
| CpG_30-31 | 82,660,774-82,660,779 | SBP               | 0.507995  | 0.459972 | -0.393533 | 1.409523  | 0.269417 |
| CpG_30-31 | 82,660,774-82,660,779 | DBP               | 0.287138  | 0.276811 | -0.255401 | 0.829678  | 0.299592 |
| CpG_30-31 | 82,660,774-82,660,779 | Total cholesterol | 0.018422  | 0.026799 | -0.034104 | 0.070947  | 0.49183  |
| CpG_30-31 | 82,660,774-82,660,779 | HDL               | -0.0035   | 0.00706  | -0.017338 | 0.010337  | 0.62004  |
| CpG_30-31 | 82,660,774-82,660,779 | LDL               | 0.035291  | 0.023943 | -0.011636 | 0.082219  | 0.140486 |
| CpG_30-31 | 82,660,774-82,660,779 | Triglycerides     | -0.022796 | 0.029772 | -0.081148 | 0.035557  | 0.443869 |
| CpG_32    | 82,660,791            | SBP               | -0.54208  | 0.473913 | -1.470932 | 0.386772  | 0.25269  |
| CpG_32    | 82,660,791            | DBP               | -0.231357 | 0.290791 | -0.801298 | 0.338583  | 0.426257 |
| CpG_32    | 82,660,791            | Total cholesterol | -0.045592 | 0.026462 | -0.097457 | 0.006272  | 0.0849   |
| CpG_32    | 82,660,791            | HDL               | 0.013012  | 0.007632 | -0.001947 | 0.027971  | 0.088225 |
| CpG_32    | 82,660,791            | LDL               | -0.03992  | 0.023009 | -0.085017 | 0.005176  | 0.082737 |
| CpG_32    | 82,660,791            | Triglycerides     | -0.038376 | 0.028779 | -0.094782 | 0.01803   | 0.182382 |
| CpG_36    | 82,660,826            | SBP               | 0.181269  | 0.391056 | -0.585187 | 0.947725  | 0.64298  |
| CpG_36    | 82,660,826            | DBP               | 0.067154  | 0.240716 | -0.404641 | 0.538949  | 0.780264 |
| CpG_36    | 82,660,826            | Total cholesterol | 0.010064  | 0.023685 | -0.036358 | 0.056486  | 0.670905 |
| CpG_36    | 82,660,826            | HDL               | 0.003976  | 0.006457 | -0.00868  | 0.016632  | 0.538076 |
| CpG_36    | 82,660,826            | LDL               | 0.027781  | 0.020315 | -0.012036 | 0.067598  | 0.171462 |
| CpG_36    | 82,660,826            | Triglycerides     | -0.028317 | 0.025575 | -0.078443 | 0.021809  | 0.268201 |
| CpG_37    | 82,660,834            | SBP               | 1.647919  | 1.36543  | -1.028275 | 4.324114  | 0.227476 |
| CpG_37    | 82,660,834            | DBP               | 0.538005  | 0.833542 | -1.095707 | 2.171717  | 0.518639 |
| CpG_37    | 82,660,834            | Total cholesterol | 0.04097   | 0.078085 | -0.112074 | 0.194014  | 0.599805 |
| CpG_37    | 82,660,834            | HDL               | -0.02593  | 0.021305 | -0.067687 | 0.015826  | 0.223557 |

|           |                       |                   |           |          |           |           |          |
|-----------|-----------------------|-------------------|-----------|----------|-----------|-----------|----------|
| CpG_37    | 82,660,834            | LDL               | 0.011405  | 0.068471 | -0.122794 | 0.145605  | 0.867705 |
| CpG_37    | 82,660,834            | Triglycerides     | 0.009432  | 0.085175 | -0.157507 | 0.176371  | 0.911823 |
| CpG_38    | 82,660,843            | SBP               | 0.136913  | 0.313411 | -0.477362 | 0.751188  | 0.662222 |
| CpG_38    | 82,660,843            | DBP               | -0.024939 | 0.195998 | -0.409089 | 0.359211  | 0.898748 |
| CpG_38    | 82,660,843            | Total cholesterol | -0.004471 | 0.01761  | -0.038987 | 0.030045  | 0.799589 |
| CpG_38    | 82,660,843            | HDL               | -0.003928 | 0.005034 | -0.013795 | 0.005939  | 0.435223 |
| CpG_38    | 82,660,843            | LDL               | 0.002291  | 0.015247 | -0.027592 | 0.032174  | 0.880571 |
| CpG_38    | 82,660,843            | Triglycerides     | -0.014478 | 0.018924 | -0.051568 | 0.022612  | 0.444229 |
| CpG_39-42 | 82,660,847-82,660,855 | SBP               | 0.424747  | 0.273014 | -0.11035  | 0.959844  | 0.119762 |
| CpG_39-42 | 82,660,847-82,660,855 | DBP               | 0.227774  | 0.163777 | -0.093224 | 0.548771  | 0.1643   |
| CpG_39-42 | 82,660,847-82,660,855 | Total cholesterol | 0.02509   | 0.014714 | -0.003748 | 0.053928  | 0.088146 |
| CpG_39-42 | 82,660,847-82,660,855 | HDL               | -0.000165 | 0.004188 | -0.008373 | 0.008043  | 0.968628 |
| CpG_39-42 | 82,660,847-82,660,855 | LDL               | 0.011831  | 0.012703 | -0.013067 | 0.036729  | 0.35167  |
| CpG_39-42 | 82,660,847-82,660,855 | Triglycerides     | 0.001053  | 0.015196 | -0.028731 | 0.030838  | 0.944735 |
| CpG_43    | 82,660,866            | SBP               | -0.074058 | 0.102273 | -0.274509 | 0.126393  | 0.468991 |
| CpG_43    | 82,660,866            | DBP               | -0.030145 | 0.061757 | -0.151187 | 0.090897  | 0.625463 |
| CpG_43    | 82,660,866            | Total cholesterol | -0.012281 | 0.005755 | -0.023561 | -0.001002 | 0.032843 |
| CpG_43    | 82,660,866            | HDL               | 0.003042  | 0.001537 | 3E-05     | 0.006055  | 0.047762 |
| CpG_43    | 82,660,866            | LDL               | -0.011511 | 0.005117 | -0.021541 | -0.001481 | 0.024493 |
| CpG_43    | 82,660,866            | Triglycerides     | -0.010248 | 0.006398 | -0.022789 | 0.002292  | 0.109226 |
| CpG_45    | 82,660,890            | SBP               | 0.539311  | 0.279292 | -0.008091 | 1.086712  | 0.053484 |
| CpG_45    | 82,660,890            | DBP               | 0.270013  | 0.172253 | -0.067597 | 0.607623  | 0.116989 |
| CpG_45    | 82,660,890            | Total cholesterol | 0.005592  | 0.015774 | -0.025325 | 0.036508  | 0.722972 |
| CpG_45    | 82,660,890            | HDL               | -0.000427 | 0.004569 | -0.009382 | 0.008528  | 0.925562 |
| CpG_45    | 82,660,890            | LDL               | 0.015485  | 0.013162 | -0.010313 | 0.041282  | 0.239419 |
| CpG_45    | 82,660,890            | Triglycerides     | -0.014544 | 0.01694  | -0.047745 | 0.018656  | 0.390557 |
| CpG_52    | 82,661,050            | SBP               | 0.776308  | 0.450689 | -0.107028 | 1.659643  | 0.084981 |
| CpG_52    | 82,661,050            | DBP               | 0.460499  | 0.302604 | -0.132594 | 1.053593  | 0.128062 |
| CpG_52    | 82,661,050            | Total cholesterol | 0.03481   | 0.02461  | -0.013424 | 0.083045  | 0.157222 |
| CpG_52    | 82,661,050            | HDL               | -0.00174  | 0.008253 | -0.017915 | 0.014435  | 0.833035 |
| CpG_52    | 82,661,050            | LDL               | 0.031213  | 0.021708 | -0.011333 | 0.073759  | 0.150471 |
| CpG_52    | 82,661,050            | Triglycerides     | -0.00416  | 0.021726 | -0.046742 | 0.038422  | 0.848155 |
| CpG_53    | 82,661,087            | SBP               | 0.584293  | 0.383029 | -0.166429 | 1.335016  | 0.127145 |

|           |                       |                   |           |          |           |           |          |
|-----------|-----------------------|-------------------|-----------|----------|-----------|-----------|----------|
| CpG_53    | 82,661,087            | DBP               | 0.380154  | 0.235853 | -0.08211  | 0.842417  | 0.107    |
| CpG_53    | 82,661,087            | Total cholesterol | 0.024373  | 0.019575 | -0.013992 | 0.062739  | 0.213078 |
| CpG_53    | 82,661,087            | HDL               | -0.013952 | 0.006085 | -0.025878 | -0.002026 | 0.021855 |
| CpG_53    | 82,661,087            | LDL               | 0.016387  | 0.017162 | -0.017249 | 0.050024  | 0.339645 |
| CpG_53    | 82,661,087            | Triglycerides     | 0.045285  | 0.018127 | 0.009757  | 0.080813  | 0.012483 |
| CpG_54    | 82,661,095            | SBP               | 0.258438  | 0.394574 | -0.514914 | 1.031789  | 0.512482 |
| CpG_54    | 82,661,095            | DBP               | -0.180386 | 0.26934  | -0.708284 | 0.347511  | 0.503027 |
| CpG_54    | 82,661,095            | Total cholesterol | -0.009086 | 0.021446 | -0.051118 | 0.032947  | 0.671812 |
| CpG_54    | 82,661,095            | HDL               | -0.004719 | 0.007379 | -0.019181 | 0.009743  | 0.522469 |
| CpG_54    | 82,661,095            | LDL               | -0.009952 | 0.018833 | -0.046864 | 0.02696   | 0.597201 |
| CpG_54    | 82,661,095            | Triglycerides     | 0.002613  | 0.01845  | -0.033549 | 0.038775  | 0.887371 |
| CpG_57-58 | 82,661,139-82,661,141 | SBP               | 0.035831  | 0.257947 | -0.469735 | 0.541397  | 0.889522 |
| CpG_57-58 | 82,661,139-82,661,141 | DBP               | 0.172002  | 0.178585 | -0.178018 | 0.522023  | 0.335478 |
| CpG_57-58 | 82,661,139-82,661,141 | Total cholesterol | -0.004489 | 0.014189 | -0.032298 | 0.02332   | 0.751724 |
| CpG_57-58 | 82,661,139-82,661,141 | HDL               | 0.001488  | 0.004857 | -0.008032 | 0.011008  | 0.759376 |
| CpG_57-58 | 82,661,139-82,661,141 | LDL               | -0.002789 | 0.01239  | -0.027073 | 0.021495  | 0.821917 |
| CpG_57-58 | 82,661,139-82,661,141 | Triglycerides     | -0.000191 | 0.011623 | -0.022972 | 0.02259   | 0.986889 |
| CpG_62-64 | 82,661,175-82,661,188 | SBP               | -0.637326 | 0.414659 | -1.450042 | 0.17539   | 0.124296 |
| CpG_62-64 | 82,661,175-82,661,188 | DBP               | -0.602219 | 0.273646 | -1.138555 | -0.065883 | 0.027756 |
| CpG_62-64 | 82,661,175-82,661,188 | Total cholesterol | -0.017463 | 0.02048  | -0.057603 | 0.022677  | 0.393832 |
| CpG_62-64 | 82,661,175-82,661,188 | HDL               | -0.000103 | 0.006792 | -0.013415 | 0.013208  | 0.987874 |
| CpG_62-64 | 82,661,175-82,661,188 | LDL               | -0.025614 | 0.01798  | -0.060854 | 0.009625  | 0.15427  |
| CpG_62-64 | 82,661,175-82,661,188 | Triglycerides     | 0.006507  | 0.017476 | -0.027746 | 0.040759  | 0.709652 |
| CpG_66    | 82,661,202            | SBP               | -0.080206 | 0.282295 | -0.633494 | 0.473081  | 0.776317 |
| CpG_66    | 82,661,202            | DBP               | -0.05318  | 0.18247  | -0.410815 | 0.304454  | 0.770709 |
| CpG_66    | 82,661,202            | Total cholesterol | 0.022103  | 0.016156 | -0.009563 | 0.053769  | 0.171289 |
| CpG_66    | 82,661,202            | HDL               | -0.006893 | 0.005027 | -0.016746 | 0.00296   | 0.170341 |
| CpG_66    | 82,661,202            | LDL               | 0.016494  | 0.014504 | -0.011933 | 0.04492   | 0.255446 |
| CpG_66    | 82,661,202            | Triglycerides     | 0.02192   | 0.015518 | -0.008496 | 0.052335  | 0.157801 |
| CpG_67    | 82,661,217            | SBP               | 0.053645  | 0.397008 | -0.724477 | 0.831767  | 0.892515 |
| CpG_67    | 82,661,217            | DBP               | -0.031513 | 0.247046 | -0.515713 | 0.452688  | 0.898499 |
| CpG_67    | 82,661,217            | Total cholesterol | -0.01113  | 0.023758 | -0.057695 | 0.035436  | 0.639463 |
| CpG_67    | 82,661,217            | HDL               | 0.009718  | 0.006714 | -0.00344  | 0.022877  | 0.147752 |

|           |                       |                   |           |          |           |           |          |
|-----------|-----------------------|-------------------|-----------|----------|-----------|-----------|----------|
| CpG_67    | 82,661,217            | LDL               | -0.008702 | 0.021387 | -0.050621 | 0.033216  | 0.684081 |
| CpG_67    | 82,661,217            | Triglycerides     | -0.032505 | 0.024722 | -0.08096  | 0.01595   | 0.188578 |
| CpG_69-70 | 82,661,244-82,661,248 | SBP               | -0.254228 | 0.637022 | -1.502769 | 0.994312  | 0.689828 |
| CpG_69-70 | 82,661,244-82,661,248 | DBP               | -0.324185 | 0.415519 | -1.138586 | 0.490217  | 0.435278 |
| CpG_69-70 | 82,661,244-82,661,248 | Total cholesterol | -0.07068  | 0.034625 | -0.138543 | -0.002818 | 0.041217 |
| CpG_69-70 | 82,661,244-82,661,248 | HDL               | -0.003151 | 0.010873 | -0.024463 | 0.01816   | 0.771945 |
| CpG_69-70 | 82,661,244-82,661,248 | LDL               | -0.076236 | 0.030041 | -0.135115 | -0.017357 | 0.011156 |
| CpG_69-70 | 82,661,244-82,661,248 | Triglycerides     | -0.016471 | 0.031481 | -0.078172 | 0.045231  | 0.600839 |
| CpG_71-72 | 82,661,267-82,661,275 | SBP               | -0.011715 | 0.455433 | -0.904346 | 0.880917  | 0.979479 |
| CpG_71-72 | 82,661,267-82,661,275 | DBP               | -0.136927 | 0.289296 | -0.703935 | 0.430082  | 0.635992 |
| CpG_71-72 | 82,661,267-82,661,275 | Total cholesterol | -0.047923 | 0.02491  | -0.096744 | 0.000899  | 0.054372 |
| CpG_71-72 | 82,661,267-82,661,275 | HDL               | -0.001588 | 0.007756 | -0.016789 | 0.013613  | 0.837759 |
| CpG_71-72 | 82,661,267-82,661,275 | LDL               | -0.048714 | 0.021837 | -0.091514 | -0.005914 | 0.025696 |
| CpG_71-72 | 82,661,267-82,661,275 | Triglycerides     | -0.011491 | 0.024684 | -0.05987  | 0.036889  | 0.641564 |
| CpG_73-74 | 82,661,285-82,661,290 | SBP               | 0.154236  | 0.342114 | -0.516295 | 0.824766  | 0.652111 |
| CpG_73-74 | 82,661,285-82,661,290 | DBP               | -0.059846 | 0.210259 | -0.471946 | 0.352254  | 0.775928 |
| CpG_73-74 | 82,661,285-82,661,290 | Total cholesterol | -0.019336 | 0.019271 | -0.057106 | 0.018434  | 0.315664 |
| CpG_73-74 | 82,661,285-82,661,290 | HDL               | -0.006502 | 0.005576 | -0.017431 | 0.004426  | 0.243564 |
| CpG_73-74 | 82,661,285-82,661,290 | LDL               | -0.008773 | 0.01722  | -0.042523 | 0.024976  | 0.610399 |
| CpG_73-74 | 82,661,285-82,661,290 | Triglycerides     | -0.005296 | 0.021482 | -0.0474   | 0.036808  | 0.805265 |
| CpG_75-76 | 82,661,313-82,661,326 | SBP               | 0.195127  | 0.488148 | -0.761626 | 1.151879  | 0.689357 |
| CpG_75-76 | 82,661,313-82,661,326 | DBP               | 0.062095  | 0.307293 | -0.540187 | 0.664378  | 0.83986  |
| CpG_75-76 | 82,661,313-82,661,326 | Total cholesterol | 0.006535  | 0.026003 | -0.04443  | 0.057501  | 0.801562 |
| CpG_75-76 | 82,661,313-82,661,326 | HDL               | 0.008866  | 0.007592 | -0.006013 | 0.023745  | 0.242863 |
| CpG_75-76 | 82,661,313-82,661,326 | LDL               | 0.007726  | 0.02271  | -0.036784 | 0.052236  | 0.733707 |
| CpG_75-76 | 82,661,313-82,661,326 | Triglycerides     | -0.024492 | 0.025733 | -0.074928 | 0.025944  | 0.341215 |
| CpG_77-81 | 82,661,336-82,661,349 | SBP               | 0.18258   | 0.518009 | -0.832699 | 1.197858  | 0.72449  |
| CpG_77-81 | 82,661,336-82,661,349 | DBP               | -0.21093  | 0.33805  | -0.873495 | 0.451635  | 0.532653 |
| CpG_77-81 | 82,661,336-82,661,349 | Total cholesterol | -0.061271 | 0.030547 | -0.121143 | -0.001399 | 0.044882 |
| CpG_77-81 | 82,661,336-82,661,349 | HDL               | -0.018769 | 0.009591 | -0.037567 | 3.03E-05  | 0.05037  |
| CpG_77-81 | 82,661,336-82,661,349 | LDL               | -0.033423 | 0.026862 | -0.086071 | 0.019224  | 0.213397 |
| CpG_77-81 | 82,661,336-82,661,349 | Triglycerides     | -0.028023 | 0.02922  | -0.085293 | 0.029246  | 0.337532 |
| CpG_83    | 82,661,360            | SBP               | 0.087189  | 0.236481 | -0.376305 | 0.550684  | 0.712355 |

|           |                       |                   |           |          |           |          |          |
|-----------|-----------------------|-------------------|-----------|----------|-----------|----------|----------|
| CpG_83    | 82,661,360            | DBP               | -0.075749 | 0.154258 | -0.378088 | 0.22659  | 0.623386 |
| CpG_83    | 82,661,360            | Total cholesterol | -0.003121 | 0.010889 | -0.024463 | 0.018221 | 0.774393 |
| CpG_83    | 82,661,360            | HDL               | 0.000126  | 0.003488 | -0.006711 | 0.006962 | 0.971291 |
| CpG_83    | 82,661,360            | LDL               | -0.003958 | 0.009403 | -0.022388 | 0.014473 | 0.673846 |
| CpG_83    | 82,661,360            | Triglycerides     | -0.013772 | 0.009481 | -0.032354 | 0.00481  | 0.146325 |
| CpG_84-85 | 82,661,384-82,661,390 | SBP               | 0.09653   | 0.227182 | -0.348738 | 0.541798 | 0.670907 |
| CpG_84-85 | 82,661,384-82,661,390 | DBP               | 0.164077  | 0.152133 | -0.134098 | 0.462251 | 0.280807 |
| CpG_84-85 | 82,661,384-82,661,390 | Total cholesterol | -0.009715 | 0.0124   | -0.034018 | 0.014588 | 0.43335  |
| CpG_84-85 | 82,661,384-82,661,390 | HDL               | -0.002885 | 0.004193 | -0.011104 | 0.005333 | 0.491392 |
| CpG_84-85 | 82,661,384-82,661,390 | LDL               | -0.003437 | 0.010863 | -0.024728 | 0.017853 | 0.751674 |
| CpG_84-85 | 82,661,384-82,661,390 | Triglycerides     | -0.001907 | 0.01087  | -0.023213 | 0.019398 | 0.860717 |
| CpG_86    | 82,661,399            | SBP               | -0.067136 | 0.114733 | -0.292008 | 0.157737 | 0.558449 |
| CpG_86    | 82,661,399            | DBP               | -0.026801 | 0.08098  | -0.18552  | 0.131918 | 0.740677 |
| CpG_86    | 82,661,399            | Total cholesterol | -0.002559 | 0.006991 | -0.016262 | 0.011144 | 0.714377 |
| CpG_86    | 82,661,399            | HDL               | -0.002476 | 0.002484 | -0.007345 | 0.002393 | 0.318991 |
| CpG_86    | 82,661,399            | LDL               | 0.000276  | 0.006091 | -0.011663 | 0.012214 | 0.963904 |
| CpG_86    | 82,661,399            | Triglycerides     | -0.007769 | 0.00585  | -0.019235 | 0.003697 | 0.184159 |
| CpG_87-88 | 82,661,404-82,661,413 | SBP               | 0.005633  | 0.254644 | -0.493459 | 0.504725 | 0.982351 |
| CpG_87-88 | 82,661,404-82,661,413 | DBP               | 0.145994  | 0.169045 | -0.185328 | 0.477316 | 0.387786 |
| CpG_87-88 | 82,661,404-82,661,413 | Total cholesterol | 0.018831  | 0.014489 | -0.009567 | 0.047228 | 0.193714 |
| CpG_87-88 | 82,661,404-82,661,413 | HDL               | -0.004646 | 0.004722 | -0.013901 | 0.00461  | 0.325261 |
| CpG_87-88 | 82,661,404-82,661,413 | LDL               | 0.021103  | 0.012742 | -0.003871 | 0.046078 | 0.097693 |
| CpG_87-88 | 82,661,404-82,661,413 | Triglycerides     | -0.001281 | 0.013196 | -0.027145 | 0.024582 | 0.922639 |
| CpG_89    | 82,661,421            | SBP               | 0.119111  | 0.394339 | -0.65378  | 0.892001 | 0.762613 |
| CpG_89    | 82,661,421            | DBP               | 0.015652  | 0.251784 | -0.477836 | 0.50914  | 0.950432 |
| CpG_89    | 82,661,421            | Total cholesterol | 0.033512  | 0.022865 | -0.011302 | 0.078327 | 0.142743 |
| CpG_89    | 82,661,421            | HDL               | -0.007679 | 0.006964 | -0.021328 | 0.00597  | 0.270154 |
| CpG_89    | 82,661,421            | LDL               | 0.042427  | 0.020469 | 0.002308  | 0.082545 | 0.038197 |
| CpG_89    | 82,661,421            | Triglycerides     | -0.013206 | 0.021949 | -0.056226 | 0.029814 | 0.5474   |
| CpG_90    | 82,661,438            | SBP               | -0.029149 | 0.32715  | -0.67035  | 0.612053 | 0.929003 |
| CpG_90    | 82,661,438            | DBP               | 0.045671  | 0.209682 | -0.365297 | 0.45664  | 0.827575 |
| CpG_90    | 82,661,438            | Total cholesterol | 0.013897  | 0.018155 | -0.021687 | 0.049481 | 0.444005 |
| CpG_90    | 82,661,438            | HDL               | -0.00552  | 0.005614 | -0.016523 | 0.005484 | 0.325542 |



|         |            |                   |           |          |           |          |          |
|---------|------------|-------------------|-----------|----------|-----------|----------|----------|
| CpG_90  | 82,661,438 | LDL               | 0.019487  | 0.016116 | -0.0121   | 0.051073 | 0.226603 |
| CpG_90  | 82,661,438 | Triglycerides     | -0.007209 | 0.017185 | -0.040891 | 0.026473 | 0.674865 |
| CpG_91  | 82,661,469 | SBP               | 0.392981  | 0.288586 | -0.172637 | 0.958599 | 0.173277 |
| CpG_91  | 82,661,469 | DBP               | 0.298113  | 0.204261 | -0.102231 | 0.698457 | 0.144435 |
| CpG_91  | 82,661,469 | Total cholesterol | 0.005428  | 0.018084 | -0.030017 | 0.040872 | 0.764079 |
| CpG_91  | 82,661,469 | HDL               | -0.000943 | 0.005603 | -0.011925 | 0.010039 | 0.866363 |
| CpG_91  | 82,661,469 | LDL               | 0.013874  | 0.014494 | -0.014535 | 0.042282 | 0.338472 |
| CpG_91  | 82,661,469 | Triglycerides     | -0.007586 | 0.012466 | -0.032018 | 0.016847 | 0.542845 |
| CpG_92  | 82,661,480 | SBP               | 0.576062  | 0.529497 | -0.461733 | 1.613857 | 0.27662  |
| CpG_92  | 82,661,480 | DBP               | 0.293021  | 0.32379  | -0.341596 | 0.927637 | 0.36548  |
| CpG_92  | 82,661,480 | Total cholesterol | 0.006597  | 0.029841 | -0.05189  | 0.065084 | 0.825033 |
| CpG_92  | 82,661,480 | HDL               | 0.004561  | 0.008801 | -0.012689 | 0.021811 | 0.604309 |
| CpG_92  | 82,661,480 | LDL               | 0.014094  | 0.026771 | -0.038376 | 0.066563 | 0.598563 |
| CpG_92  | 82,661,480 | Triglycerides     | -0.043891 | 0.031858 | -0.106332 | 0.01855  | 0.168299 |
| CpG_104 | 82,661,633 | SBP               | 0.056109  | 0.176871 | -0.290552 | 0.40277  | 0.751068 |
| CpG_104 | 82,661,633 | DBP               | 0.05982   | 0.110221 | -0.156209 | 0.275849 | 0.587316 |
| CpG_104 | 82,661,633 | Total cholesterol | -0.003952 | 0.009846 | -0.02325  | 0.015346 | 0.688149 |
| CpG_104 | 82,661,633 | HDL               | -0.002799 | 0.002953 | -0.008588 | 0.002989 | 0.343195 |
| CpG_104 | 82,661,633 | LDL               | 0.001247  | 0.008559 | -0.015529 | 0.018022 | 0.884199 |
| CpG_104 | 82,661,633 | Triglycerides     | 0.001125  | 0.010056 | -0.018586 | 0.020835 | 0.910965 |
| CpG_106 | 82,661,670 | SBP               | 0.589039  | 0.371796 | -0.139669 | 1.317746 | 0.113124 |
| CpG_106 | 82,661,670 | DBP               | 0.168348  | 0.243232 | -0.308378 | 0.645073 | 0.488856 |
| CpG_106 | 82,661,670 | Total cholesterol | -0.032179 | 0.020728 | -0.072805 | 0.008448 | 0.120566 |
| CpG_106 | 82,661,670 | HDL               | -0.00766  | 0.0063   | -0.020006 | 0.004687 | 0.224027 |
| CpG_106 | 82,661,670 | LDL               | -0.008777 | 0.017634 | -0.04334  | 0.025785 | 0.618657 |
| CpG_106 | 82,661,670 | Triglycerides     | 0.020262  | 0.016809 | -0.012683 | 0.053208 | 0.228041 |
| CpG_107 | 82,661,696 | SBP               | -0.167186 | 0.46358  | -1.075786 | 0.741415 | 0.718368 |
| CpG_107 | 82,661,696 | DBP               | -0.139103 | 0.287079 | -0.701767 | 0.423561 | 0.627997 |
| CpG_107 | 82,661,696 | Total cholesterol | 0.01936   | 0.02572  | -0.03105  | 0.06977  | 0.451615 |
| CpG_107 | 82,661,696 | HDL               | 0.006421  | 0.007725 | -0.008719 | 0.021561 | 0.405849 |
| CpG_107 | 82,661,696 | LDL               | 0.006089  | 0.022346 | -0.037708 | 0.049886 | 0.785244 |
| CpG_107 | 82,661,696 | Triglycerides     | 0.02191   | 0.024963 | -0.027016 | 0.070837 | 0.380104 |
| CpG_108 | 82,661,701 | SBP               | 0.131489  | 0.157088 | -0.176397 | 0.439375 | 0.402569 |

|         |            |                   |           |          |           |          |          |
|---------|------------|-------------------|-----------|----------|-----------|----------|----------|
| CpG_108 | 82,661,701 | DBP               | 0.065109  | 0.103715 | -0.138168 | 0.268386 | 0.530156 |
| CpG_108 | 82,661,701 | Total cholesterol | -0.00238  | 0.008284 | -0.018616 | 0.013857 | 0.773922 |
| CpG_108 | 82,661,701 | HDL               | 0.000531  | 0.002559 | -0.004484 | 0.005546 | 0.835641 |
| CpG_108 | 82,661,701 | LDL               | 0.004644  | 0.006731 | -0.008548 | 0.017836 | 0.490227 |
| CpG_108 | 82,661,701 | Triglycerides     | -0.000519 | 0.006664 | -0.013581 | 0.012542 | 0.937883 |
| CpG_109 | 82,661,725 | SBP               | 0.217461  | 0.269557 | -0.310862 | 0.745783 | 0.41982  |
| CpG_109 | 82,661,725 | DBP               | -0.001102 | 0.164383 | -0.323287 | 0.321083 | 0.99465  |
| CpG_109 | 82,661,725 | Total cholesterol | -0.014044 | 0.015348 | -0.044127 | 0.016038 | 0.360168 |
| CpG_109 | 82,661,725 | HDL               | 0.000171  | 0.004529 | -0.008706 | 0.009049 | 0.969821 |
| CpG_109 | 82,661,725 | LDL               | -0.000454 | 0.013771 | -0.027444 | 0.026536 | 0.973718 |
| CpG_109 | 82,661,725 | Triglycerides     | -0.023    | 0.017311 | -0.05693  | 0.01093  | 0.183981 |
| CpG_116 | 82,661,812 | SBP               | 0.029393  | 0.198621 | -0.359897 | 0.418683 | 0.882353 |
| CpG_116 | 82,661,812 | DBP               | -0.030291 | 0.131095 | -0.287233 | 0.22665  | 0.817266 |
| CpG_116 | 82,661,812 | Total cholesterol | -0.013565 | 0.010979 | -0.035084 | 0.007954 | 0.216643 |
| CpG_116 | 82,661,812 | HDL               | 0.005415  | 0.003369 | -0.001188 | 0.012018 | 0.107956 |
| CpG_116 | 82,661,812 | LDL               | -0.001579 | 0.00906  | -0.019336 | 0.016178 | 0.861623 |
| CpG_116 | 82,661,812 | Triglycerides     | -0.008632 | 0.008828 | -0.025933 | 0.00867  | 0.32816  |

<sup>a</sup> Numbering and the precise localization of CpG sites/units within *CDH13* promoter region is provided in Figure S2. CpG sites 1-15 are located upstream from CpG island, sites 16-116 are within the CpG island and sites 18-26 are in the first exon.

<sup>b</sup> Genomic position on chromosome 16 is according to GRCh37/hg19.

<sup>c</sup> Effects (methylation on scale from 0-100% effect on cardio-metabolic traits) and *P*-values are calculated using linear regression, including age, gender and experiment series as covariates to the model.

<sup>d</sup> Results were combined using the inverse-variance method under fixed-effects model. Estimated Bonferroni threshold  $\alpha=0.05/[5 \text{ (independent parameters)} \times 46 \text{ (CpG sites/units)} \times 2 \text{ (HYPEST and CAD CZ studies)}]=1.09 \times 10^{-4}$ .

SE, standard error; CI, confidence interval.

**A- meQTL analysis**  
SNP-CpG methylation  
association testing

Discovery for the *CDH13* promoter  
region (HYPEST/CADCZ, n=358):

- 7 shared SNPs from resequencing
- EpiTYPER™ assay, 46 CpG-sites

Validation data extracted from genotyping  
and methylation arrays (EGCUT, n=165):

- 4 SNPs overlapping with HYPEST/CADCZ
- 57 CpG sites across *CDH13*

**B- SNP-trait** association  
testing

HYPEST (n=184): association testing  
of 11 SNPs and HWM adiponectin

HYPEST/CADCZ/EGCUT meta-analysis (n=523): association testing of 4  
overlapping *CDH13* promoter meQTLs with total cholesterol, LDL, HDL, SBP, DBP

**C- DNA methylation-  
trait** association testing

HYPEST/CADCZ (n=358): 46 CpG sites in  
*CDH13* promoter (EpiTYPER™ assay) with  
total cholesterol, LDL, HDL, SBP, DBP

**Supplemental Figure S1** Overview of the study data and analysis.

**(A)** In the discovery analysis, seven *CDH13* promoter SNP shared by HYPEST and CADCZ were tested for association with DNA methylation levels at the 46 studied *cis*-CpG-sites/units. For meQTL confirmation analysis in the EGCUT sample set, the SNPs in the *CDH13* promoter region overlapping with the HYPEST/CADCZ dataset (rs12443878, rs12444338, rs62040565, rs8060301) were assessed for the effect on the DNA methylation level at the CpG-sites measured across the *CDH13* gene (n=57) in EGCUT. **(B)** The effect of genotypes on cardio-metabolic traits (total cholesterol, LDL, HDL, triglycerides, SBP, DBP) was tested in the meta-analysis across HYPEST, CADCZ and EGCUT for the four SNPs (rs12443878, rs12444338, rs62040565, rs8060301) shared by the three datasets. Genetic association testing with serum HMW adiponectin levels was applicable for the HYPEST samples (not available for CADCZ and EGCUT) for 11 SNP detected in resequencing. **(C)** The effect of methylation levels at the 46 *CDH13* promoter CpG-sites/units on serum lipids and BP in HYPEST and CADCZ subjects was assessed by meta-analysis across the two samples. No validation was sought as the discovery analysis did not reach significant results.

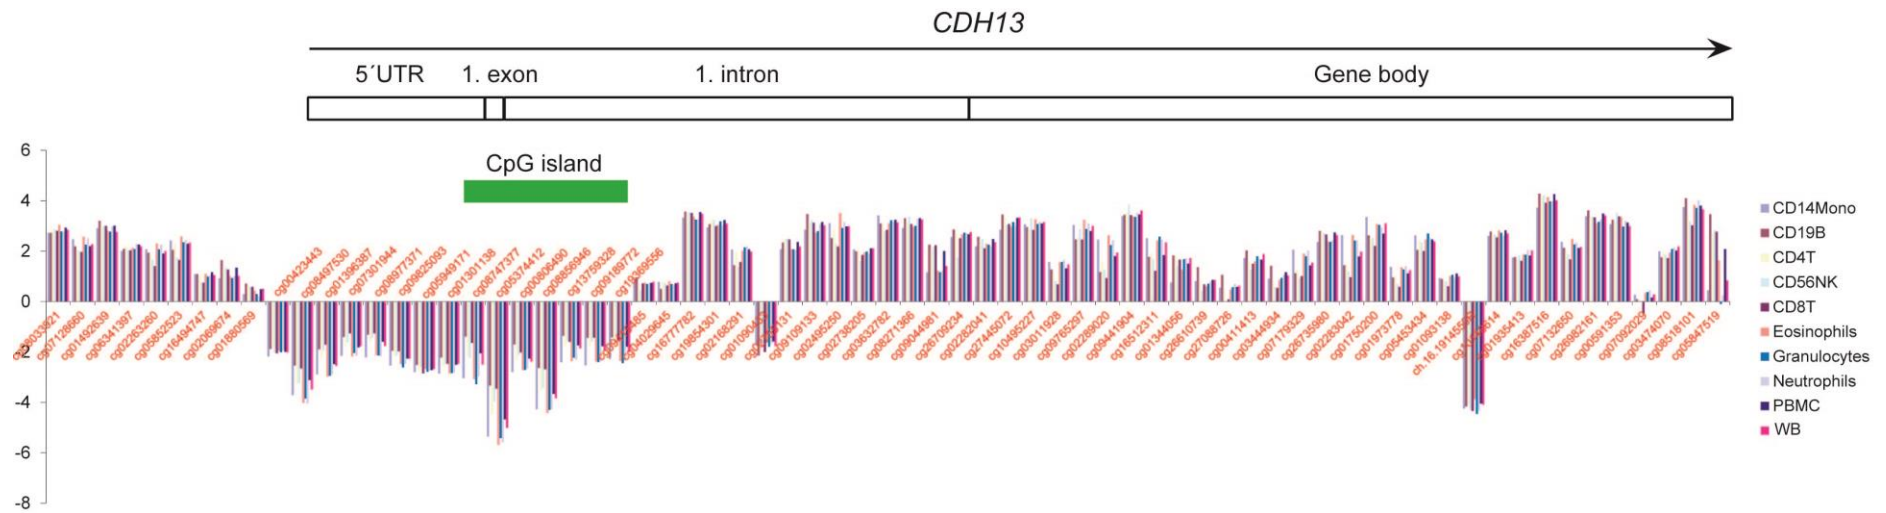

**Supplemental Figure S2** *CDH13* DNA methylation in different blood cell types. DNA methylation of 69 CpG-sites (red codes) covering *CDH13* locus on Infinium HumanMethylation450 BeadChip is defined as M-value (described in Reinius et al., 2012). Vertical bars (10 per each CpG-site) represent nine blood cell types and whole blood (listed on the right). Positive values indicate to methylated and negative values to unmethylated state. Location of CpG-sites in the *CDH13* gene is shown at the top.



53 54 55  
C**CG**GAGGCT**CG**GTGCATTGGAGAAAGACTCAGTTAGAGG**CG**ACTCCA  
56 5758 59 60 61 62  
A**CG**AGC**CGCG**GTTTTCCCCAGCCCAA**CG**CCCAG**CG**GC**CG**AAG**CG**CTG  
63 64 65 66 67  
CT**CG**GGT**CG**GATTG**CG**GGATG**CG**GGGCTGGAGAGGC**CG**AGCAGGCA  
68 69 70 71  
CCAC**CG**ACTTCCCAGGG**CG**CC**CG**GGCCCCCTGGTACAGCC**CG**GCTGC  
72 73 74 75  
C**CG**CTGGAAGG**CG**CCT**CG**GGGCAGCAGAGAGCCTCAGCC**CG**GCTGCT  
76 77 78 79 80 81 82 83  
GCTGT**CG**CTCAAAGG**CG**CC**CG**GC**CG**GC**CG**CACC**CG**CAT**CG**GGGTCC  
84 85 86 87 88  
TTTTGCTCCCAGACCC**CG**GGCC**CG**AAAGGGC**CG**GAG**CG**TGTCCCC**CG**  
89 90  
CCAGGG**CG**CAGGCCCCAGCCCC**CG**CACCCCTATTGTCCAGCCAGCT  
91 92 93  
GGAGCTC**CG**GCCAGATCC**CG**GGCTGC**CG**CCTCTGCTGCCTTCCCTGA  
94 95 96 97  
G**CG**GGAG**CG**GAG**CG**CAGAGAAAAGTTCAAGCCTTGCCCACC**CG**GGCT  
98 99 100101  
GCAGCTGCTTGTTAACCTCAGAG**CG**CCA**CG**GC**CG**AGGGAAGGGCA  
102 103 104 105  
**CG**CCAACCAGGAGAGGGGG**CG**AGGGAGATG**CG**GTCC**CG**CCTGCAGTCA  
106 107  
CCTCTGCACCTCAGAGATTT**CG**GGAAGTTTGAGTGCAGGAAAGCAGC  
108 109 110 111  
GCTC**CG**AGGCCAGGCCTGGGGTGCTGGC**CG**CTG**CG**GGGGGCA**CG**CCC  
112 113 114  
TG**CG**CTGCTCAGGGGCCTGTGGTTTT**CG**GAGAGCACCC**CG**ATCCAGTC  
115 116  
CCCCAT**CG**CCTCTCTGGCAGG**CG**TTGGGACTTGGAGTGAGCTGGCAG  
82, 661, 877 ↩  
CCTGCAAGTGGGTGGATAAGAGCCAGGGCAGGGCAGGGCCGGGCAGA

**Supplemental Figure S3** *CDH13* promoter region targeted for DNA methylation analysis. Arrows indicate the start and end positions of the region on chromosome 16 targeted for methylation measurement. CpG sites marked bold and red are sites in the targeted region. Numbers coloured red indicate sites that passed QC and were used in the association analysis. The CpG island covers sites 16-116. The sequence of the first exon is underlined covering CpG sites 18-26. Assay 1-yellow background, assay 2- grey background, assay 3-light blue background, assay 4- purple background, overlapping assays- dark blue (**Table S2**).



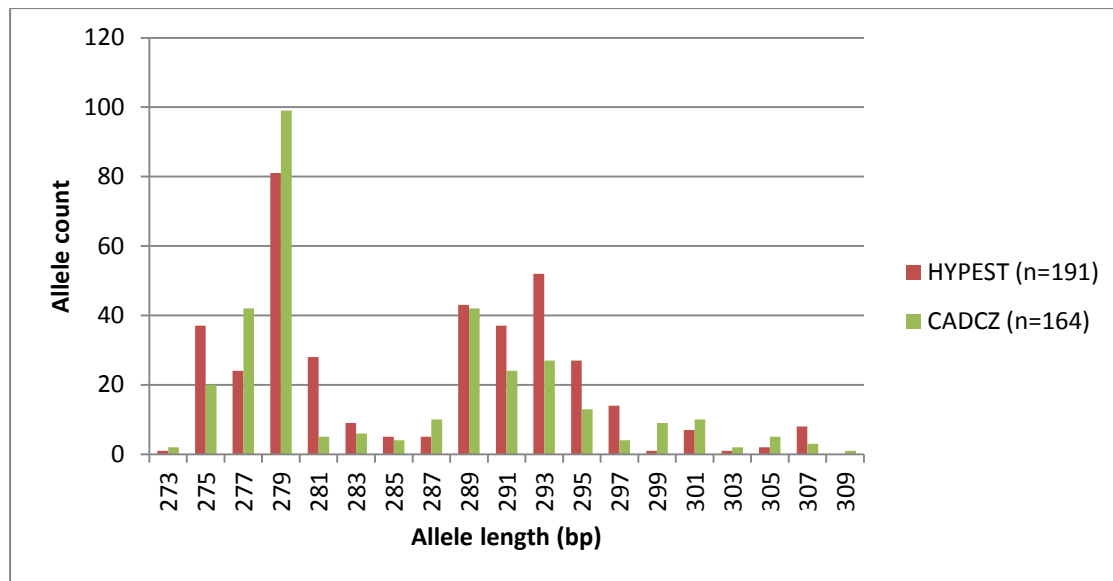

**Supplemental Figure S4** Distribution of microsatellite length variants in HYPEST and CADCZ. On the x-axis the length (bp) of alleles identified by fragment analysis on 3730xl DNA Analyzer is shown. The y-axis shows the number of alleles identified in HYPEST (n=191) and CADCZ (n=164) study groups.

## References to Supplemental Materials and Methods

1000 Genomes Project Consortium, Abecasis GR, Auton A, Brooks LD, DePristo MA, Durbin RM, Handsaker RE, Kang HM, Marth GT, McVean GA. An integrated map of genetic variation from 1,092 human genomes. *Nature*. 2012;491(7422):56-65.

Adalsteinsson BT, Gudnason H, Aspelund T, Harris TB, Launer LJ, Eiriksdottir G, Smith AV, Gudnason V. Heterogeneity in white blood cells has potential to confound DNA methylation measurements. *PLoS One*. 2012;7(10):e46705

Aryee MJ, Jaffe AE, Corrada-Bravo H, Ladd-Acosta C, Feinberg AP, Hansen KD, Irizarry RA: Minfi: a flexible and comprehensive Bioconductor package for the analysis of Infinium DNA methylation microarrays. *Bioinformatics* 2014

Bell JT, Tsai PC, Yang TP, Pidsley R, Nisbet J, Glass D, Mangino M, Zhai G, Zhang F, Valdes A, et al. Epigenome-wide scans identify differentially methylated regions for age and age-related phenotypes in a healthy ageing population. *PLoS Genet*. 2012;8(4):e1002629.

Ehrich M, Nelson MR, Stanssens P, Zabeau M, Liloglou T, Xinarianos G, Cantor CR, Field JK, van den Boom D. Quantitative high-throughput analysis of DNA methylation patterns by base-specific cleavage and mass spectrometry. *Proc Natl Acad Sci USA*. 2005;102(44):15785-90

Gomes MV, Toffoli LV, Arruda DW, Soldera LM, Pelosi GG, Neves-Souza RD, Freitas ER, Castro DT, Marquez AS. Age-related changes in the global DNA methylation profile of leukocytes are linked to nutrition but are not associated with the MTHFR C677T genotype or to functional capacities. *PLoS One*. 2012;7(12):e52570.

Howie BN, Donnelly P, Marchini J. A flexible and accurate genotype imputation method for the next generation of genome-wide association studies. *PLoS Genet*. 2009;5(6):e1000529.

Janosíková B, Pavlíková M, Kocmanová D, Vítová A, Veselá K, Krupková L, Kahleová R, Krijt J, Kraml P, Hyánek J, et al. Genetic variants of homocysteine metabolizing enzymes and the risk of coronary artery disease. *Mol Genet Metab.* 2003;79(3):167-75.

Leitsalu L, Haller T, Esko T, Tammesoo ML, Alavere H, Snieder H, Perola M, Ng PC, Mägi R, Milani L, et al. Cohort Profile: Estonian Biobank of the Estonian Genome Center, University of Tartu. *Int J Epidemiol.* 2014;[Epub ahead of print]

Maksimovic J, Gordon L, Oshlack A. SWAN: Subset-quantile within array normalization for illumina infinium HumanMethylation450 BeadChips. *Genome Biol.* 2012;13(6):R44.

Org E, Veldre G, Viigimaa M, Juhanson P, Putku M, Rosenberg M, Tomberg K, Uuetoa T, Laan M. HYPEST study: profile of hypertensive patients in Estonia. *BMC Cardiovasc Disord.* 2011;11:55.

Reinius LE, Acevedo N, Joerink M, Pershagen G, Dahlén SE, Greco D, Söderhäll C, Scheynius A, Kere J. Differential DNA methylation in purified human blood cells: implications for cell lineage and studies on disease susceptibility. *PLoS One.* 2012;7(7):e41361.

Tobin MD, Sheehan NA, Scurrah KJ, Burton PR. Adjusting for treatment effects in studies of quantitative traits: antihypertensive therapy and systolic blood pressure. *Stat Med.* 2005;24(19):2911-35.

Westra HJ, Jansen RC, Fehrmann RS, te Meerman GJ, van Heel D, Wijmenga C, Franke L. MixupMapper: correcting sample mix-ups in genome-wide datasets increases power to detect small genetic effects. *Bioinformatics.* 2011;27(15):2104-11.

Wu J, Province MA, Coon H, Hunt SC, Eckfeldt JH, Arnett DK, Heiss G, Lewis CE, Ellison RC, Rao DC, et al. An investigation of the effects of lipid-lowering medications: genome-wide linkage analysis of lipids in the HyperGEN study. *BMC Genet.* 2007;8:60.
